# Supplementary material for: Transmission of ultraviolet, visible and near-infrared solar radiation to plants within a seasonal snow pack
Source: Royal Society of Chemistry journal article supplement (doi:10.1039/c9pp00197b), 2019-07-19
Supplement: c9pp00197b1.xlsx [file c9pp00197b1.xlsx]

## Sheet: DailyWeather
2018						Kumpula	Kumpula	Kumpula	Kumpula	Kumpula	Malmi	Malmi	Malmi	Vanta
Date	Year	Month	Day	Time	Time zone	Rainfall (mm)	Snow Depth (cm)	Air temperature (degC)	High Temperature (degC)	Lowest Temperature (degC)	Air temperature (degC)	High Temperature (degC)	Lowest Temperature (degC)	Snow Depth (cm)
2018-01-01	2018	1	1	00:00:00	UTC	4.5	3	1.7	2.2	0.2	1	1.7	-0.2	2
2018-01-02	2018	1	2	00:00:00	UTC	-1	-1	4.3	5.2	1.3	4	4.7	0.4	-1
2018-01-03	2018	1	3	00:00:00	UTC	0.9	-1	3.2	4.7	1.8	2.9	4.4	1.4	-1
2018-01-04	2018	1	4	00:00:00	UTC	2.7	-1	2.8	3.2	1.9	2.3	2.9	1.1	-1
2018-01-05	2018	1	5	00:00:00	UTC	3.9	-1	4	4.6	3.1	3.7	4.4	2.8	-1
2018-01-06	2018	1	6	00:00:00	UTC	0.6	-1	2.1	4.1	0.7	1.8	3.8	0.5	-1
2018-01-07	2018	1	7	00:00:00	UTC	-1	-1	-1.4	0.9	-3.3	-1.9	0.5	-4.2	0
2018-01-08	2018	1	8	00:00:00	UTC	-1	-1	-0.6	1.1	-1.7	-1.2	0.7	-3.3	0
2018-01-09	2018	1	9	00:00:00	UTC	-1	-1	0.5	1.9	-0.5	-0.2	1.6	-2.2	1
2018-01-10	2018	1	10	00:00:00	UTC	-1	-1	-2.6	-0.1	-3.4	-3.3	-0.5	-5.4	0
2018-01-11	2018	1	11	00:00:00	UTC	-1	-1	-2.8	-1.4	-5.3	-3.9	-2.5	-7.8	0
2018-01-12	2018	1	12	00:00:00	UTC	-1	-1	-1.7	-0.4	-3.2	-3.3	-1	-6.5	0
2018-01-13	2018	1	13	00:00:00	UTC	-1	-1	-1.6	-1.2	-3	-2.5	-1.9	-3.4	0
2018-01-14	2018	1	14	00:00:00	UTC	-1	-1	-3.1	-1	-5	-3.8	-1.6	-6.5	0
2018-01-15	2018	1	15	00:00:00	UTC	-1	-1	-6.4	-4.8	-7.2	-6.8	-4.9	-7.6	0
2018-01-16	2018	1	16	00:00:00	UTC	-1	-1	-5.7	-4.1	-7.5	-6.2	-4.6	-7.9	0
2018-01-17	2018	1	17	00:00:00	UTC	4.1	-1	-5.5	-4.1	-6.5	-5.9	-4.6	-6.8	0
2018-01-18	2018	1	18	00:00:00	UTC	2.1	6	-3.1	-2.2	-4.7	-3.7	-2.7	-5.2	16
2018-01-19	2018	1	19	00:00:00	UTC	-1	9	-2.8	-1.1	-4.9	-4.2	-2.4	-6.9	21
2018-01-20	2018	1	20	00:00:00	UTC	-1	8	-2.6	-1	-3.7	-3	-1.7	-4	19
2018-01-21	2018	1	21	00:00:00	UTC	0.9	7	-6.3	-3.7	-8.1	-6.8	-3.9	-8.6	14
2018-01-22	2018	1	22	00:00:00	UTC	0.9	8	-5.8	-1.7	-9.5	-8	-4	-13	15
2018-01-23	2018	1	23	00:00:00	UTC	2.4	8	-6.3	-1.2	-11.5	-7.9	-3.8	-14.7	20
2018-01-24	2018	1	24	00:00:00	UTC	12.1	10	-0.7	2.1	-3.6	-1.1	2	-5.4	21
2018-01-25	2018	1	25	00:00:00	UTC	0.9	7	4	4.5	2.1	4.1	4.7	1.8	14
2018-01-26	2018	1	26	00:00:00	UTC	0.1	-1	3.2	4.3	2.8	3.2	4.7	2.8	0
2018-01-27	2018	1	27	00:00:00	UTC	0.4	-1	2.1	3	1.4	1.9	3	1.4	0
2018-01-28	2018	1	28	00:00:00	UTC	2.3	-1	0.4	1.6	-0.7	0	1.4	-1.7	0
2018-01-29	2018	1	29	00:00:00	UTC	0.4	0	0.1	0.9	-0.3	-0.3	0.6	-0.6	1
2018-01-30	2018	1	30	00:00:00	UTC	0.6	0	-2.4	-0.2	-3.6	-3	-0.6	-4.7	2
2018-01-31	2018	1	31	00:00:00	UTC	3.3	2	-2.7	-1.1	-4.6	-3.8	-1.6	-6.4	4
2018-02-01	2018	2	1	00:00:00	UTC	20.3	4	-0.7	0.6	-1.8	-1.2	0	-2.3	6
2018-02-02	2018	2	2	00:00:00	UTC	-1	16	1.7	2.3	0.5	1.1	1.8	-0.2	24
2018-02-03	2018	2	3	00:00:00	UTC	-1	11	-4.7	1.6	-8.6	-5.7	1.1	-9.3	19
2018-02-04	2018	2	4	00:00:00	UTC	-1	11	-9.9	-7.7	-12.4	-10.8	-8.3	-13.6	19
2018-02-05	2018	2	5	00:00:00	UTC	1.1	11	-7.9	-5.9	-10.1	-9	-6.5	-11.3	18
2018-02-06	2018	2	6	00:00:00	UTC	2.9	11	-8.4	-7.2	-10.2	-9	-7.8	-11.4	19
2018-02-07	2018	2	7	00:00:00	UTC	1.4	18	-5.2	-4.1	-7.7	-8	-5.3	-14.4	24
2018-02-08	2018	2	8	00:00:00	UTC	0.2	18	-2.8	0	-10	-4.2	-0.8	-13.9	25
2018-02-09	2018	2	9	00:00:00	UTC	-1	19	-6	-3	-7.3	-6.3	-3.4	-7.7	26
2018-02-10	2018	2	10	00:00:00	UTC	0.1	17	-5.8	-4	-8.3	-6.3	-4.5	-9.1	26
2018-02-11	2018	2	11	00:00:00	UTC	0.5	16	-3.7	-2.4	-8.3	-4.3	-3	-8.8	25
2018-02-12	2018	2	12	00:00:00	UTC	5.9	17	-2.2	-1.4	-3.2	-2.7	-1.8	-3.8	26
2018-02-13	2018	2	13	00:00:00	UTC	-1	21	0.3	1	-1.5	-0.1	0.7	-1.8	29
2018-02-14	2018	2	14	00:00:00	UTC	-1	21	0.2	0.9	-0.6	-0.1	0.7	-0.5	27
2018-02-15	2018	2	15	00:00:00	UTC	0.6	20	-3	0.3	-5.9	-3.6	-0.1	-6.6	27
2018-02-16	2018	2	16	00:00:00	UTC	-1	20	-4.1	-2.6	-5.5	-4.8	-3.2	-6.8	28
2018-02-17	2018	2	17	00:00:00	UTC	-1	20	-4.7	-2.6	-5.8	-7	-3.8	-11.3	26
2018-02-18	2018	2	18	00:00:00	UTC	-1	19	-8.6	-5.3	-10.1	-11.2	-6.4	-16.2	26
2018-02-19	2018	2	19	00:00:00	UTC	-1	20	-9.4	-6.2	-11.8	-10.5	-7.1	-16.5	26
2018-02-20	2018	2	20	00:00:00	UTC	-1	20	-10	-4.9	-14.2	-12.3	-5.6	-16.1	26
2018-02-21	2018	2	21	00:00:00	UTC	-1	20	-11.4	-7	-14.9	-15.6	-6.7	-21.5	26
2018-02-22	2018	2	22	00:00:00	UTC	-1	20	-12.4	-6.3	-17.3	-16.2	-5.9	-23.6	26
2018-02-23	2018	2	23	00:00:00	UTC	-1	20	-11.4	-5.7	-16.9	-14.6	-7.2	-22.8	26
2018-02-24	2018	2	24	00:00:00	UTC	-1	20	-13.3	-10.1	-16.1	-14.6	-10.6	-17.7	26
2018-02-25	2018	2	25	00:00:00	UTC	0.2	20	-10.1	-6.3	-15.8	-10.9	-6.5	-17.4	26
2018-02-26	2018	2	26	00:00:00	UTC	-1	20	-9.6	-6.7	-12.4	-10.3	-7.1	-13.3	27
2018-02-27	2018	2	27	00:00:00	UTC	-1	21	-16.5	-12.4	-18.1	-17.4	-13.2	-19	27
2018-02-28	2018	2	28	00:00:00	UTC	-1	21	-15.7	-12.2	-19.7	-17.1	-12.5	-22	27
2019	Vuosi	Kk	Pv	Klo	Aikavyöhyke	Sademäärä (mm)	Lumensyvyys (cm)	Ilman lämpötila (degC)	Ylin lämpötila (degC)	Alin lämpötila (degC)	Ilman lämpötila (degC)	Ylin lämpötila (degC)	Alin lämpötila (degC)
2018-12-31	2018	12	31	00:00	UTC	8	3	-0.9	0.2	-2.2	-1.1	0.1	-4	8
2019-01-01	2019	1	1	00:00	UTC	0.4		2.2	4.1	0	2.3	4	0	9
2019-01-02	2019	1	2	00:00	UTC	0.6	2	-3.2	1.9	-6.5	-3.3	1.7	-6.8	7
2019-01-03	2019	1	3	00:00	UTC	3	3	-9.7	-6.5	-12.4	-10.2	-6.7	-13.4	7
2019-01-04	2019	1	4	00:00	UTC	1	7	-1.6	0.8	-13.2	-1.9	0.8	-14.2	8
2019-01-05	2019	1	5	00:00	UTC	0		-5	-0.6	-5.6	-5.1	-0.8	-5.7	9
2019-01-06	2019	1	6	00:00	UTC	1.6		-3.9	-0.1	-7.8	-4	0	-7.2	10
2019-01-07	2019	1	7	00:00	UTC	3.7	3	1	2.1	-0.8	1.1	2.2	-0.5	9
2019-01-08	2019	1	8	00:00	UTC	11.3	4	0.1	1.2	-1	0.1	0.9	-0.9	10
2019-01-09	2019	1	9	00:00	UTC	0.7	18	-2.1	-0.2	-4.3	-2.2	-0.1	-4.4	22
2019-01-10	2019	1	10	00:00	UTC	2.5	17	-4.5	-3.2	-6.5	-4.6	-3.2	-6.5	21
2019-01-11	2019	1	11	00:00	UTC	-1	17	0.9	1.6	-4.4	1.1	1.9	-4.5	20
2019-01-12	2019	1	12	00:00	UTC	-1	15	-2.4	1.5	-5	-3	1.9	-6.3	20
2019-01-13	2019	1	13	00:00	UTC	3.8	14	-2.9	0.5	-6.7	-5.8	0.1	-13.2	20
2019-01-14	2019	1	14	00:00	UTC	1.3	19	-2.5	0.1	-6.1	-2.7	-0.1	-5.3	23
2019-01-15	2019	1	15	00:00	UTC	0.4	19	-6.4	-4.8	-10.1	-7.2	-4.8	-15.2	24
2019-01-16	2019	1	16	00:00	UTC	11.5	19	-6	-3.7	-8.8	-6.6	-3.5	-12.2	24
2019-01-17	2019	1	17	00:00	UTC	1.6	28	-4.8	-1.6	-8.4	-4.9	-1.8	-10.9	33
2019-01-18	2019	1	18	00:00	UTC	-1	20	-9.8	-6.5	-12.4	-12.3	-7.7	-17.2	36
2019-01-19	2019	1	19	00:00	UTC	3.3	27	-6	-0.3	-13.7	-7.2	-0.5	-18.8	35
2019-01-20	2019	1	20	00:00	UTC	-1	30	-8.5	-0.9	-12.5	-9.2	-0.5	-17.1	37
2019-01-21	2019	1	21	00:00	UTC	-1	30	-15.7	-12.3	-17.6	-18.1	-12.1	-22.3	37
2019-01-22	2019	1	22	00:00	UTC	0.8	30	-15.5	-10.8	-21.7	-20	-15.1	-25.7	37
2019-01-23	2019	1	23	00:00	UTC	2.6	30	-2.2	-0.4	-13.2	-2.2	-0.2	-17.4	38
2019-01-24	2019	1	24	00:00	UTC	0	32	-8.6	-1.5	-11.4	-9.2	-1.4	-12.6	45
2019-01-25	2019	1	25	00:00	UTC	2.4	30	-4	-2.6	-10.8	-4.7	-2.6	-11.2	45
2019-01-26	2019	1	26	00:00	UTC	2.4	31	-8.7	-5.1	-10.3	-8.9	-5.2	-10.6	45
2019-01-27	2019	1	27	00:00	UTC	-1	36	-14.3	-10.1	-16.3	-17.2	-10.2	-22.3	45
2019-01-28	2019	1	28	00:00	UTC	12.8	34	-7.9	-5.5	-16.7	-8.2	-5.6	-23.1	44
2019-01-29	2019	1	29	00:00	UTC	8.7	47	-4.8	-4.1	-5.9	-5	-4.2	-5.7	51
2019-01-30	2019	1	30	00:00	UTC	1.4	53	-1.3	0.4	-4.9	-1.9	0.6	-5	55
2019-01-31	2019	1	31	00:00	UTC	0	54	-0.9	0.5	-3.6	-1.4	0.6	-3.9	56
2019-02-01	2019	2	1	00:00	UTC	1	51	-3.7	-1.5	-5.9	-3.8	-1.4	-5.7	54
2019-02-02	2019	2	2	00:00	UTC	5	45	-2.9	-2.2	-4.7	-2.9	-2.4	-4.9	54
2019-02-03	2019	2	3	00:00	UTC	7.5	51	-0.8	1.7	-3.4	-0.7	2	-3	53
2019-02-04	2019	2	4	00:00	UTC	2.7	49	-3.9	0.9	-6.3	-3.8	1.2	-6.1	48
2019-02-05	2019	2	5	00:00	UTC	7.9	50	-0.5	0.9	-6.4	-0.4	1	-6.1	51
2019-02-06	2019	2	6	00:00	UTC	3	60	-4.3	-0.6	-8.7	-4.7	-0.2	-8.6	59
2019-02-07	2019	2	7	00:00	UTC	1.5	61	-0.3	1.4	-6.4	-0.2	1.5	-6.6	63
2019-02-08	2019	2	8	00:00	UTC	1.5	52	1.2	2.2	0.4	1.4	2.4	0.4	59
2019-02-09	2019	2	9	00:00	UTC	8.7	47	1.8	2.3	1.3	2	2.7	1.3	50
2019-02-10	2019	2	10	00:00	UTC	4	43	1.8	2.6	0.3	2.1	3	0.3	43
2019-02-11	2019	2	11	00:00	UTC	8.7	37	1.1	2.8	0.4	1.2	2.8	0.4	36
2019-02-12	2019	2	12	00:00	UTC	-1	37	-1.5	0.6	-2.8	-1.6	0.7	-2.9	38
2019-02-13	2019	2	13	00:00	UTC	2.4	36	-0.8	0.8	-5.3	-1	0.9	-9.2	37
2019-02-14	2019	2	14	00:00	UTC	-1	37	1.9	2.8	-0.1	2.2	3.2	0.4	35
2019-02-15	2019	2	15	00:00	UTC	-1	35	4.3	7.4	1.6	5	8	1.7	34
2019-02-16	2019	2	16	00:00	UTC	-1	35	2.6	6.6	0.3	2.9	6.9	-0.1	33
2019-02-17	2019	2	17	00:00	UTC	-1	34	0.9	4.1	-1.3	0.3	3.7	-2.7	33
2019-02-18	2019	2	18	00:00	UTC	0.4	32	0.2	2.1	-3.6	-0.8	2.3	-7.5	33
2019-02-19	2019	2	19	00:00	UTC	5.1	30	1.6	1.9	1.3	1.9	2.3	1.4	32
2019-02-20	2019	2	20	00:00	UTC	0	29	-0.9	2.5	-4.1	-0.9	2.7	-4.3	30
2019-02-21	2019	2	21	00:00	UTC	-1	28	-6.7	-3.9	-8.9	-7.3	-4.3	-9.2	30
2019-02-22	2019	2	22	00:00	UTC	1.2	27	-7.1	-2.1	-12.2	-7.8	-1.5	-14.4	30
2019-02-23	2019	2	23	00:00	UTC	0.2	30	1.3	4.9	-5.3	1.3	5	-5.4	32
2019-02-24	2019	2	24	00:00	UTC	0	30	2.3	4	0.4	2.6	4.6	0.5	31
2019-02-25	2019	2	25	00:00	UTC	0.5	28	5	8	3.5	5.1	7.2	3.9	31
2019-02-26	2019	2	26	00:00	UTC	-1	28	2.1	5.4	0.8	1.5	4.1	0	30
2019-02-27	2019	2	27	00:00	UTC	-1	27	2.8	5.2	-0.9	3.2	6	-3.3	29
2019-02-28	2019	2	28	00:00	UTC	0.3	27	1.7	4.6	-1.4	1.6	4.9	-1.5	29
2019-03-01	2019	3	1	00:00	UTC	0	25	-5.3	-1.4	-7.9	-5.6	-1.5	-8.3	29
2019-03-02	2019	3	2	00:00	UTC	-1	26	-0.2	3.1	-6.4	-0.2	3.3	-6.5	29
2019-03-03	2019	3	3	00:00	UTC	0	26	-5.3	1.1	-8.6	-5.9	1.2	-9.2	29
2019-03-04	2019	3	4	00:00	UTC	2.8	27	-3.2	-1.7	-5.4	-3.6	-1.8	-6	29
2019-03-05	2019	3	5	00:00	UTC	-1	28	-4.9	-1.6	-7.7	-5.2	-1.7	-8	30
2019-03-06	2019	3	6	00:00	UTC	0.3	28	-7.5	-3	-15.2	-8.1	-3.2	-18.7	29
2019-03-07	2019	3	7	00:00	UTC	10.3	27	-0.1	0.5	-3.3	-0.2	0.3	-3.3	30
2019-03-08	2019	3	8	00:00	UTC	7.4	30	2.8	4.7	0.3	3.1	4.9	0.3	31
2019-03-09	2019	3	9	00:00	UTC	5.8	27	0.1	3.1	-2.3	0.2	3.5	-2.2	28
2019-03-10	2019	3	10	00:00	UTC	-1	28	-1	1.7	-3	-1.4	1.6	-3.5	29
2019-03-11	2019	3	11	00:00	UTC	0.3	28	-5.4	-2.9	-7.5	-6.1	-2.8	-10.5	29
2019-03-12	2019	3	12	00:00	UTC	-1	29	-5.3	-1.2	-9.8	-6.9	-1.9	-11.6	31
2019-03-13	2019	3	13	00:00	UTC	4.9	29	-4	0.1	-10.6	-5.5	-0.7	-14.6	32
2019-03-14	2019	3	14	00:00	UTC	0.7	30	1.1	2.2	-1.6	1.1	2	-1.5	40
2019-03-15	2019	3	15	00:00	UTC	4.5	29	1.9	2.3	1.2	1.9	2.4	1.1	30
2019-03-16	2019	3	16	00:00	UTC	3	26	1.5	3.2	0.8	1.4	3	0.8	27
2019-03-17	2019	3	17	00:00	UTC	9.9	25	1.5	2.5	0.3	1.5	2.3	0.1	26
2019-03-18	2019	3	18	00:00	UTC	1.7	21	3.1	4.3	1.2	3.3	4.2	0.8	28
2019-03-19	2019	3	19	00:00	UTC	0.2	19	2.5	5.4	1.7	2.4	5.1	1.8	23
2019-03-20	2019	3	20	00:00	UTC	1.7	17	1	2.8	-0.6	1	3	-0.6	22
2019-03-21	2019	3	21	00:00	UTC	0	15	2.5	5.4	-0.2	2.9	6.1	-0.3	20
2019-03-22	2019	3	22	00:00	UTC	-1	12	3.6	7.6	0.7	3	6.8	0.9	16
2019-03-23	2019	3	23	00:00	UTC	1	14	1.9	3.4	0.5	2.1	3.8	-2.3	15
2019-03-24	2019	3	24	00:00	UTC	-1	13	3.4	6.9	0.4	3.7	6.6	0.8	14
2019-03-25	2019	3	25	00:00	UTC	0	4	1.2	5.1	-1.3	0.2	4.8	-3.8	12

## Sheet: HourlyWeather
					Kumpula	Kumpula	Kumpula	Kumpula	Kumpula	Kumpula	Malmi	Malmi	Malmi	Malmi	Vanta	Vanta	Vanta	Vanta	Vanta
Year	month	pv	at the	Time zone	Number of Clouds (1/8)	Air pressure (msl) (hPa)	Relative humidity (%)	Rainfall intensity (mm / h)	Snow depth (cm)	Air temperature (degC)	Number of Clouds (1/8)	Air pressure (msl) (hPa)	Relative humidity (%)	Air temperature (degC)	Air pressure (msl) (hPa)	Relative humidity (%)	Rainfall intensity (mm / h)	Snow depth (cm)	Air temperature (degC)
2018	2	28	00:00:00	UTC	8	1048.8	67	0	21	-17.3	8	1049.2	70	-19.1	1049.5	74	0	31	-20
2018	2	28	00:10:00	UTC	8	1048.7	67	0	21	-17.5	7	1049.2	71	-19.2	1049.4	74	0	31	-20.4
2018	2	28	00:20:00	UTC	7	1048.7	67	0	21	-17.4	4	1049.2	71	-19.5	1049.4	75	0	31	-20.4
2018	2	28	00:30:00	UTC	7	1048.8	67	0	21	-17.5	2	1049.2	72	-19.6	1049.5	76	0	31	-20.6
2018	2	28	00:40:00	UTC	7	1048.8	68	0	21	-17.6	0	1049.2	72	-19.7	1049.6	77	0	31	-20.5
2018	2	28	00:50:00	UTC	7	1048.8	68	0	21	-17.7	0	1049.3	73	-19.8	1049.6	77	0	31	-20.8
2018	2	28	01:00:00	UTC	7	1048.8	68	0	21	-17.8	0	1049.2	73	-19.9	1049.6	77	0	31	-20.7
2018	2	28	01:10:00	UTC	3	1048.8	68	0	21	-18.1	1	1049.3	74	-20.2	1049.6	77	0	31	-20.9
2018	2	28	01:20:00	UTC	1	1048.8	69	0	21	-18.3	2	1049.2	75	-20.1	1049.5	77	0	31	-20.7
2018	2	28	01:30:00	UTC	0	1048.8	70	0	21	-18.5	1	1049.2	74	-19.8	1049.4	77	0	31	-20.8
2018	2	28	01:40:00	UTC	0	1048.8	70	0	21	-18.6	1	1049.2	74	-20	1049.4	78	0	31	-20.9
2018	2	28	01:50:00	UTC	3	1048.7	70	0	21	-18.6	0	1049.1	75	-20	1049.4	78	0	31	-20.8
2018	2	28	02:00:00	UTC	5	1048.7	70	0	21	-18.6	1	1049.1	75	-20.2	1049.4	78	0	31	-20.8
2018	2	28	02:10:00	UTC	7	1048.7	71	0	21	-18.6	0	1049.1	75	-20.3	1049.5	78	0	31	-20.9
2018	2	28	02:20:00	UTC	7	1048.7	71	0	21	-18.7	0	1049.1	75	-20.3	1049.4	77	0	31	-21.1
2018	2	28	02:30:00	UTC	8	1048.7	71	0	21	-18.6	0	1049.1	75	-20.5	1049.3	78	0	31	-21
2018	2	28	02:40:00	UTC	8	1048.8	71	0	21	-18.7	0	1049.1	76	-20.4	1049.4	78	0	31	-21.2
2018	2	28	02:50:00	UTC	8	1048.7	71	0	21	-18.6	0	1049.1	77	-20.4	1049.3	79	0	31	-21.5
2018	2	28	03:00:00	UTC	8	1048.6	72	0	21	-18.7	0	1049.1	77	-20.5	1049.4	80	0	31	-21.7
2018	2	28	03:10:00	UTC	7	1048.7	72	0	21	-18.7	0	1049	77	-20.6	1049.3	80	0	31	-21.5
2018	2	28	03:20:00	UTC	5	1048.7	72	0	21	-18.9	0	1049.1	78	-20.6	1049.4	80	0	31	-21.5
2018	2	28	03:30:00	UTC	3	1048.7	73	0	21	-19	0	1049.1	78	-20.7	1049.4	80	0	31	-21.4
2018	2	28	03:40:00	UTC	1	1048.8	73	0	21	-19.1	0	1049.1	78	-20.9	1049.4	80	0	31	-21.4
2018	2	28	03:50:00	UTC	1	1048.7	74	0	21	-19.3	0	1049.1	79	-21.2	1049.4	80	0	31	-21.4
2018	2	28	04:00:00	UTC	1	1048.7	74	0	21	-19.4	0	1049	79	-21.1	1049.3	80	0	31	-21.5
2018	2	28	04:10:00	UTC	1	1048.7	75	0	21	-19.5	0	1049	79	-21.3	1049.2	81	0	31	-21.5
2018	2	28	04:20:00	UTC	1	1048.7	75	0	21	-19.5	0	1049	80	-21.2	1049.2	81	0	31	-21.4
2018	2	28	04:30:00	UTC	0	1048.7	75	0	21	-19.5	0	1049	80	-21.4	1049.1	81	0	31	-21.5
2018	2	28	04:40:00	UTC	0	1048.6	75	0	21	-19.5	0	1049	81	-21.9	1049.2	81	0	31	-21.7
2018	2	28	04:50:00	UTC	0	1048.6	76	0	21	-19.6	0	1049	81	-21.6	1049.2	81	0	31	-21.8
2018	2	28	05:00:00	UTC	0	1048.6	76	0	21	-19.6	0	1048.9	82	-21.6	1049.2	82	0	31	-21.9
2018	2	28	05:10:00	UTC	0	1048.6	76	0	21	-19.5	0	1048.9	82	-21.8	1049.1	82	0	31	-22
2018	2	28	05:20:00	UTC	0	1048.6	76	0	21	-19.6	0	1048.9	82	-21.8	1049.2	83	0	31	-21.9
2018	2	28	05:30:00	UTC	0	1048.6	77	0	21	-19.6	0	1049	82	-21.5	1049.3	82	0	31	-21.8
2018	2	28	05:40:00	UTC	0	1048.6	76	0	21	-19.6	0	1048.9	81	-21.4	1049.2	82	0	31	-21.7
2018	2	28	05:50:00	UTC	0	1048.6	77	0	21	-19.6	0	1049	81	-21.9	1049.2	82	0	31	-21.6
2018	2	28	06:00:00	UTC	0	1048.6	77	0	21	-19.7	0	1049	81	-21.7	1049.2	81	0	31	-21.5
2018	2	28	06:10:00	UTC	0	1048.6	76	0	21	-19.6	0	1049	81	-21.5	1049.3	81	0	31	-21.4
2018	2	28	06:20:00	UTC	0	1048.7	76	0	21	-19.5	0	1049.1	80	-20.8	1049.2	81	0	31	-21.2
2018	2	28	06:30:00	UTC	0	1048.7	75	0	21	-19.3	0	1049	78	-20.7	1049.2	80	0	31	-20.7
2018	2	28	06:40:00	UTC	1	1048.6	74	0	21	-19.2	0	1049	78	-20.5	1049.2	79	0	31	-20.5
2018	2	28	06:50:00	UTC	1	1048.6	73	0	21	-19.1	0	1048.9	77	-20.3	1049.1	78	0	31	-20.2
2018	2	28	07:00:00	UTC	1	1048.6	72	0	21	-19	0	1048.9	76	-20	1049.1	78	0	31	-19.9
2018	2	28	07:10:00	UTC	0	1048.6	73	0	21	-18.7	0	1049	75	-19.7	1049.1	77	0	31	-19.7
2018	2	28	07:20:00	UTC	0	1048.6	71	0	21	-18.4	0	1048.9	74	-19.3	1049.1	76	0	31	-19.3
2018	2	28	07:30:00	UTC	0	1048.6	71	0	21	-18	0	1048.9	73	-19	1049.1	75	0	31	-19
2018	2	28	07:40:00	UTC	0	1048.7	70	0	21	-17.6	0	1048.9	73	-18.8	1049.1	74	0	31	-18.8
2018	2	28	07:50:00	UTC	0	1048.6	68	0	21	-17.6	0	1048.9	71	-18.4	1049.1	74	0	31	-18.5
2018	2	28	08:00:00	UTC	0	1048.5	69	0	21	-17.3	0	1049	71	-18.1	1049.2	73	0	31	-18.3
2018	2	28	08:10:00	UTC	0	1048.6	67	0	21	-16.8	0	1048.9	70	-17.9	1049.1	73	0	31	-18
2018	2	28	08:20:00	UTC	0	1048.5	67	0	21	-16.7	0	1048.8	70	-17.8	1049.1	72	0	31	-17.8
2018	2	28	08:30:00	UTC	0	1048.5	66	0	21	-16.4	0	1048.8	69	-17.6	1049	72	0	31	-17.7
2018	2	28	08:40:00	UTC	0	1048.4	64	0	21	-16.2	0	1048.8	69	-17.4	1048.9	72	0	31	-17.4
2018	2	28	08:50:00	UTC	0	1048.4	64	0	21	-15.9	0	1048.7	68	-17.1	1048.9	72	0	31	-17.2
2018	2	28	09:00:00	UTC	0	1048.4	64	0	21	-15.6	0	1048.7	67	-16.9	1048.8	71	0	31	-17.2
2018	2	28	09:10:00	UTC	1	1048.3	63	0	21	-15.4	0	1048.6	67	-16.7	1048.8	70	0	31	-16.9
2018	2	28	09:20:00	UTC	0	1048.2	63	0	21	-15.2	0	1048.6	66	-16.6	1048.7	70	0	31	-16.6
2018	2	28	09:30:00	UTC	0	1048.2	62	0	21	-14.8	0	1048.5	66	-16.6	1048.6	68	0	31	-16.4
2018	2	28	09:40:00	UTC	1	1048.2	59	0	21	-15	0	1048.5	64	-16.1	1048.5	67	0	31	-16.4
2018	2	28	09:50:00	UTC	1	1048.1	60	0	21	-14.7	0	1048.4	63	-16	1048.5	67	0	31	-16.2
2018	2	28	10:00:00	UTC	1	1048	60	0	21	-14.6	0	1048.3	62	-15.8	1048.4	66	0	31	-16.1
2018	2	28	10:10:00	UTC	0	1047.9	59	0	21	-14.6	0	1048.2	62	-15.6	1048.3	66	0	31	-16
2018	2	28	10:20:00	UTC	0	1047.7	58	0	21	-14	0	1048	61	-15.3	1048.2	65	0	31	-15.8
2018	2	28	10:30:00	UTC	0	1047.7	57	0	21	-13.8	0	1048	60	-15.2	1048.2	64	0	31	-15.6
2018	2	28	10:40:00	UTC	0	1047.6	56	0	21	-13.5	0	1047.9	59	-15	1048	62	0	31	-15
2018	2	28	10:50:00	UTC	0	1047.5	56	0	20	-13.7	0	1047.8	59	-14.6	1048	61	0	31	-14.7
2018	2	28	11:00:00	UTC	0	1047.5	56	0	21	-13.4	0	1047.7	57	-14.5	1047.9	59	0	31	-14.7
2018	2	28	11:10:00	UTC	0	1047.4	56	0	21	-13.3	0	1047.6	56	-14.3	1047.8	58	0	31	-14.3
2018	2	28	11:20:00	UTC	0	1047.2	54	0	21	-13.3	0	1047.5	57	-14.6	1047.7	58	0	31	-14.1
2018	2	28	11:30:00	UTC	0	1047.2	53	0	20	-13.2	0	1047.5	56	-14.1	1047.6	56	0	31	-13.7
2018	2	28	11:40:00	UTC	0	1047	52	0	21	-13.1	0	1047.4	55	-13.9	1047.6	57	0	31	-14
2018	2	28	11:50:00	UTC	0	1046.9	52	0	21	-13	0	1047.2	54	-13.7	1047.4	56	0	31	-13.8
2018	2	28	12:00:00	UTC	0	1046.9	53	0	21	-13.2	0	1047.2	52	-13.5	1047.4	58	0	31	-13.7
2018	2	28	12:10:00	UTC	0	1046.8	53	0	21	-13	0	1047.1	54	-13.8	1047.4	57	0	31	-13.7
2018	2	28	12:20:00	UTC	0	1046.8	53	0	21	-13	0	1047	55	-13.7	1047.2	56	0	31	-13.7
2018	2	28	1 day, 0:30:00	UTC	1	1046.7	51	0	21	-12.7	0	1047	55	-13.5	1047.1	55	0	31	-13.3
2018	2	28	12:40:00	UTC	1	1046.5	51	0	21	-12.4	0	1046.9	54	-13.3	1047	55	0	31	-13.5
2018	2	28	12:50:00	UTC	1	1046.4	52	0	21	-12.5	0	1046.8	53	-13.1	1046.9	55	0	31	-13.3
2018	2	28	13:00:00	UTC	0	1046.3	52	0	21	-12.4	0	1046.6	54	-13.2	1046.8	54	0	31	-13.2
2018	2	28	13:10:00	UTC	0	1046.2	52	0	21	-12.4	0	1046.6	54	-13.2	1046.7	55	0	31	-13.1
2018	2	28	13:20:00	UTC	0	1046.1	51	0	21	-12.5	0	1046.5	53	-12.9	1046.6	55	0	31	-13.1
2018	2	28	13:30:00	UTC	0	1046	52	0	21	-12.4	0	1046.2	52	-12.9	1046.4	54	0	31	-13
2018	2	28	13:40:00	UTC	0	1046	52	0	21	-12.5	0	1046.3	51	-12.8	1046.4	55	0	31	-12.8
2018	2	28	13:50:00	UTC	0	1045.9	52	0	21	-12.4	0	1046.1	51	-12.6	1046.3	54	0	31	-12.7
2018	2	28	14:00:00	UTC	0	1045.8	52	0	21	-12.3	0	1046.1	51	-12.6	1046.2	53	0	31	-12.7
2018	2	28	14:10:00	UTC	0	1045.7	52	0	21	-12.3	0	1045.9	51	-12.6	1046.1	53	0	31	-12.7
2018	2	28	14:20:00	UTC	0	1045.6	52	0	21	-12.2	0	1045.8	51	-12.7	1046	54	0	31	-12.8
2018	2	28	14:30:00	UTC	0	1045.4	51	0	21	-12.2	0	1045.8	51	-12.6	1045.9	53	0	31	-12.8
2018	2	28	14:40:00	UTC	0	1045.4	52	0	21	-12.2	0	1045.6	50	-12.6	1045.7	53	0	31	-12.8
2018	2	28	14:50:00	UTC	0	1045.3	51	0	21	-12.3	0	1045.6	50	-12.6	1045.7	53	0	31	-12.8
2018	2	28	15:00:00	UTC	0	1045.2	52	0	21	-12.4	0	1045.5	50	-12.6	1045.7	53	0	31	-12.9
2018	2	28	15:10:00	UTC	0	1045.2	53	0	21	-12.5	0	1045.5	51	-12.8	1045.6	53	0	31	-13
2018	2	28	15:20:00	UTC	0	1045.2	52	0	21	-12.4	0	1045.4	51	-12.8	1045.6	54	0	31	-13.3
2018	2	28	15:30:00	UTC	0	1045.1	52	0	21	-12.4	0	1045.4	51	-13	1045.5	55	0	31	-13.5
2018	2	28	15:40:00	UTC	0	1045.1	52	0	21	-12.5	0	1045.3	52	-13.1	1045.5	55	0	31	-13.5
2018	2	28	15:50:00	UTC	0	1044.9	52	0	21	-12.6	0	1045.2	53	-13.3	1045.3	55	0	31	-13.6
2018	2	28	16:00:00	UTC	0	1044.9	53	0	21	-12.6	0	1045.2	54	-13.4	1045.4	56	0	31	-13.9
2018	2	28	16:10:00	UTC	0	1044.8	53	0	21	-12.8	0	1045.1	55	-13.5	1045.3	57	0	31	-14
2018	2	28	16:20:00	UTC	0	1044.8	53	0	21	-12.6	0	1045.1	55	-13.6	1045.2	58	0	31	-14.2
2018	2	28	16:30:00	UTC	0	1044.7	54	0	21	-12.8	0	1045	56	-13.8	1045.2	59	0	31	-14.5
2018	2	28	16:40:00	UTC	0	1044.6	54	0	21	-12.8	0	1044.9	57	-13.9	1045.1	60	0	31	-14.6
2018	2	28	16:50:00	UTC	0	1044.5	56	0	21	-13	0	1044.9	58	-14.1	1045	61	0	31	-14.8
2018	2	28	17:00:00	UTC	0	1044.5	56	0	21	-13	0	1044.8	59	-14.2	1044.9	62	0	31	-15
2018	2	28	17:10:00	UTC	0	1044.4	56	0	21	-13.1	0	1044.7	60	-14.5	1044.8	63	0	31	-15.1
2018	2	28	17:20:00	UTC	0	1044.3	56	0	21	-13.2	0	1044.6	61	-14.6	1044.8	63	0	31	-15.2
2018	2	28	17:30:00	UTC	0	1044.2	58	0	21	-13.3	0	1044.5	63	-15	1044.7	64	0	31	-15.3
2018	2	28	17:40:00	UTC	0	1044.1	58	0	21	-13.3	0	1044.5	62	-14.8	1044.7	65	0	31	-15.4
2018	2	28	17:50:00	UTC	0	1044.1	58	0	21	-13.4	0	1044.4	62	-14.6	1044.6	65	0	31	-15.5
2018	2	28	18:00:00	UTC	0	1044	59	0	21	-13.5	0	1044.3	63	-14.7	1044.5	66	0	31	-15.6
2018	2	28	18:10:00	UTC	0	1044	59	0	21	-13.7	0	1044.3	63	-14.8	1044.5	67	0	31	-15.6
2018	2	28	18:20:00	UTC	0	1043.9	60	0	21	-13.7	0	1044.2	63	-14.7	1044.4	67	0	31	-15.6
2018	2	28	18:30:00	UTC	0	1043.9	61	0	21	-13.9	0	1044.2	64	-14.9	1044.4	68	0	31	-16.2
2018	2	28	18:40:00	UTC	0	1043.9	62	0	21	-14	0	1044.2	64	-15.2	1044.4	69	0	31	-16.4
2018	2	28	18:50:00	UTC	0	1043.9	63	0	21	-14.1	0	1044.2	66	-15.1	1044.4	70	0	31	-16.4
2018	2	28	19:00:00	UTC	0	1043.9	64	0	21	-14.2	0	1044.2	66	-15.2	1044.4	70	0	31	-16.4
2018	2	28	19:10:00	UTC	0	1043.8	63	0	21	-14.2	0	1044.1	67	-15.6	1044.3	71	0	31	-16.5
2018	2	28	19:20:00	UTC	0	1043.8	63	0	21	-14.2	0	1044	67	-15.4	1044.2	71	0	31	-16.4
2018	2	28	19:30:00	UTC	0	1043.7	64	0	21	-14.2	0	1044	67	-15.7	1044.3	71	0	31	-16.6
2018	2	28	19:40:00	UTC	0	1043.7	64	0	21	-14.2	0	1044.1	70	-16.5	1044.2	72	0	31	-16.7
2018	2	28	19:50:00	UTC	0	1043.7	64	0	21	-14.2	0	1044	73	-16.6	1044.2	72	0	31	-16.6
2018	2	28	20:00:00	UTC	0	1043.5	65	0	21	-14.3	0	1044	73	-16.6	1044.1	72	0	31	-16.5
2018	2	28	20:10:00	UTC	0	1043.5	65	0	21	-14.4	0	1043.9	74	-17.1	1044	72	0	31	-16.6
2018	2	28	20:20:00	UTC	0	1043.4	65	0	21	-14.5	0	1043.8	76	-17.7	1043.9	74	0	31	-16.7
2018	2	28	20:30:00	UTC	0	1043.3	66	0	21	-14.7	0	1043.7	77	-17.3	1043.8	74	0	31	-16.8
2018	2	28	20:40:00	UTC	0	1043.2	67	0	21	-14.7	0	1043.6	77	-17.5	1043.7	75	0	31	-16.9
2018	2	28	20:50:00	UTC	0	1043.1	68	0	21	-14.8	0	1043.5	78	-17.9	1043.7	74	0	31	-17
2018	2	28	21:00:00	UTC	0	1043	68	0	21	-15	0	1043.4	78	-18	1043.6	75	0	31	-16.9
2018	2	28	21:10:00	UTC	0	1042.9	68	0	21	-14.9	0	1043.3	78	-18	1043.5	75	0	31	-17
2018	2	28	21:20:00	UTC	0	1042.8	68	0	21	-14.9	0	1043.2	78	-17.5	1043.5	75	0	31	-17.2
2018	2	28	21:30:00	UTC	0	1042.8	68	0	21	-15	0	1043.2	77	-17.6	1043.4	76	0	31	-17.3
2018	2	28	21:40:00	UTC	0	1042.8	68	0	21	-15	0	1043.1	77	-17.5	1043.3	77	0	31	-17.4
2018	2	28	21:50:00	UTC	0	1042.7	68	0	21	-15.1	0	1043.1	77	-17.9	1043.3	77	0	31	-17.5
2018	2	28	22:00:00	UTC	0	1042.6	69	0	21	-15.2	0	1043	79	-17.8	1043.2	77	0	31	-17.5
2018	2	28	22:10:00	UTC	0	1042.5	69	0	21	-15.3	0	1042.8	79	-17.9	1043.2	77	0	31	-17.5
2018	2	28	22:20:00	UTC	0	1042.5	69	0	21	-15.3	0	1042.9	78	-18	1043.1	77	0	31	-17.4
2018	2	28	22:30:00	UTC	0	1042.4	69	0	21	-15.3	0	1042.9	79	-18	1043.1	77	0	31	-17.3
2018	2	28	22:40:00	UTC	0	1042.5	70	0	21	-15.4	0	1042.8	79	-18	1043.1	77	0	31	-17.4
2018	2	28	22:50:00	UTC	0	1042.4	70	0	21	-15.4	0	1042.8	78	-18	1043	77	0	31	-17.6
2018	2	28	23:00:00	UTC	0	1042.4	70	0	21	-15.5	0	1042.8	79	-18	1042.9	78	0	31	-17.5
2018	2	28	23:10:00	UTC	0	1042.3	70	0	21	-15.6	0	1042.7	79	-17.8	1043	77	0	31	-17.5
2018	2	28	23:20:00	UTC	0	1042.3	70	0	21	-15.6	0	1042.6	77	-17.9	1042.9	78	0	31	-17.7
2018	2	28	23:30:00	UTC	0	1042.2	71	0	21	-15.7	0	1042.5	78	-17.6	1042.8	78	0	31	-17.9
2018	2	28	23:40:00	UTC	0	1042.1	71	0	21	-15.7	0	1042.5	77	-17.9	1042.7	79	0	31	-17.8
2018	2	28	23:50:00	UTC	0	1042.1	71	0	21	-15.7	0	1042.5	78	-18.1	1042.7	79	0	31	-17.9
2018	3	1	00:00:00	UTC	0	1042	72	0	21	-15.7	0	1042.3	80	-17.9	1042.6	80	0	31	-18.1
Vuosi	Kk	Pv	Klo	Aikavyöhyke	Pilvien määrä (1/8)	Ilmanpaine (msl) (hPa)	Suhteellinen kosteus (%)	Sateen intensiteetti (mm/h)	Lumensyvyys (cm)	Ilman lämpötila (degC)	Pilvien määrä (1/8)	Ilmanpaine (msl) (hPa)	Suhteellinen kosteus (%)	Ilman lämpötila (degC)	Ilmanpaine (msl) (hPa)	Suhteellinen kosteus (%)	Sateen intensiteetti (mm/h)	Lumensyvyys (cm)	Ilman lämpötila (degC)
2018	12	30	00:00	UTC	7	1022	96	0	5	-0.2	7	1011.3	92	0.5	1022.4	91	0	8	-1.8
2018	12	30	01:00	UTC	7	1022.7	98	0	5	-0.3	4	1011.2	94	-0.1	1023	91	0	8	-1.9
2018	12	30	02:00	UTC	8	1023.4	96	0	5	0	7	1011.6	93	0.3	1023.7	89	0	8	-2.3
2018	12	30	03:00	UTC	8	1023.7	95	0	5	0.1	8	1011.7	94	0.2	1023.9	88	0	8	-2.3
2018	12	30	04:00	UTC	8	1024.1	95	0	5	0.2	8	1011.7	92	0.2	1024.4	88	0	8	-2.5
2018	12	30	05:00	UTC	8	1024.9	94	0	5	0.1	8	1011.9	92	0.2	1025.1	85	0	8	-2.6
2018	12	30	06:00	UTC	8	1025.1	95	0	5	0.2	8	1012.4	93	0.2	1025.2	84	0	8	-2.9
2018	12	30	07:00	UTC	8	1025.4	95	0	5	0.1	8	1012.6	94	0.2	1025.5	84	0	8	-3
2018	12	30	08:00	UTC	8	1025.3	96	0	5	0.1	8	1013.3	94	0.3	1025.6	88	0	8	-3.4
2018	12	30	09:00	UTC	8	1025	95	0	5	0.3	8	1013.9	94	0.3	1025.2	90	0	8	-3.5
2018	12	30	10:00	UTC	8	1024.5	94	0	5	0.4	8	1014.2	93	0.4	1024.7	90	0	8	-2.9
2018	12	30	11:00	UTC	8	1023.6	93	0	5	0.5	8	1014.3	93	0.3	1023.6	87	0	8	-2.5
2018	12	30	12:00	UTC	8	1022.6	93	0	5	0.4	7	1014.9	92	0.3	1022.6	86	0	8	-1.7
2018	12	30	13:00	UTC	7	1021.3	93	0	5	0.2	8	1015.6	93	0.2	1021.2	97	0	8	-1
2018	12	30	14:00	UTC	7	1020.5	96	0	5	-0.2	8	1015.9	94	-0.1	1020.2	85	0	8	-0.8
2018	12	30	15:00	UTC	7	1019.1	96	0	5	-0.6	7	1016.3	94	-0.4	1018.9	93	0	8	-1.2
2018	12	30	16:00	UTC	8	1018.4	94	0	5	-0.3	8	1017	93	-0.4	1017.9	94	0	8	-0.9
2018	12	30	17:00	UTC	7	1016.4	91	0	5	-0.4	8	1017.6	92	-0.6	1015.8	94	0	8	-0.9
2018	12	30	18:00	UTC	8	1014.3	91	0	5	-0.5	8	1018.2	92	-0.6	1013.8	90	0	8	-0.4
2018	12	30	19:00	UTC	8	1012.1	93	0	5	-0.7	8	1018.8	92	-0.8	1011.5	93	0	8	-0.1
2018	12	30	20:00	UTC	8	1009.8	92	0	5	-0.9	8	1019.3	92	-1	1009.1	96	0	7	0.1
2018	12	30	21:00	UTC	8	1007.9	91	0	5	-0.8	8	1019.9	92	-1	1007.3	99	1	7	0
2018	12	30	22:00	UTC	8	1005.5	85	0	5	-1	8	1020.5	84	-1	1004.9	100	1.7	9	0
2018	12	30	23:00	UTC	8	1003	85	0	5	-1.1	8	1021.3	84	-1.3	1002.6	100	1.4	11	0
2018	12	31	00:00	UTC	8	1000.9	84	0	5	-1.6	8	1022.2	83	-1.6	1000.4	100	1.3	11	0.3
2018	12	31	01:00	UTC	8	998.7	84	0	5	-1.5	8	1022.8	82	-1.6	998.2	100	0.1	12	1
2018	12	31	02:00	UTC	8	996.6	82	0	5	-1.8	8	1023.5	81	-1.8	996.2	100	0.7	11	1.5
2018	12	31	03:00	UTC	8	994.2	81	0	5	-1.9	8	1023.8	81	-1.9	993.9	100	0	11	1.9
2018	12	31	04:00	UTC	8	992	82	0	5	-1.9	8	1024.2	81	-2	991.4	100	0.5	10	2.1
2018	12	31	05:00	UTC	8	990	82	0	5	-1.9	8	1025	81	-2.1	989.5	100	0.3	9	2.5
2018	12	31	06:00	UTC	8	988.1	82	0	5	-2	8	1025.1	80	-2.3	987.9	100	0.1	9	2.7
2018	12	31	07:00	UTC	8	986.4	81	0	5	-2.1	8	1025.5	81	-2.6	986.1	100	0.7	8	2.6
2018	12	31	08:00	UTC	8	984.7	82	0	5	-1.6	8	1025.5	87	-3.9	984.5	100	0.4	8	2.5
2018	12	31	09:00	UTC	8	983.3	82	0	5	-1.7	7	1025.2	83	-2.5	983.1	100	0.2	7	2.8
2018	12	31	10:00	UTC	8	981.7	80	0	5	-1.8	8	1024.6	81	-2.1	981.5	100	0	7	3
2018	12	31	11:00	UTC	8	980.8	81	0	5	-1.5	8	1023.7	81	-1.8	980.7	100	0	7	3.1
2018	12	31	12:00	UTC	7	980.7	88	0	5	-0.3	8	1022.6	79	-0.6	980.5	100	0	7	2.8
2018	12	31	13:00	UTC	8	980.6	80	0	5	0.1	8	1021.3	82	-0.2	980.4	100	0	7	2.9
2018	12	31	14:00	UTC	8	980.6	82	0	5	-0.3	8	1020.3	80	-0.3	980.4	100	0	7	2.4
2018	12	31	15:00	UTC	7	980.5	86	0	5	-0.4	8	1019.1	86	-0.6	980.5	100	0	7	1.9
2018	12	31	16:00	UTC	7	980.6	86	0	5	-0.2	8	1018.2	88	-0.2	980.7	100	0	6	1.8
2018	12	31	17:00	UTC	7	980.7	91	0.4	5	-0.4	8	1016.3	86	-0.1	980.8	100	0	6	1.3
2018	12	31	18:00	UTC	8	981.1	86	0	5	0	8	1014.1	85	0	981.2	100	0	6	1.3
2018	12	31	19:00	UTC	8	981.4	88	0	5	0.5	8	1011.8	87	0.4	981.6	100	0	6	1.2
2018	12	31	20:00	UTC	8	982	94	0	5	0.3	8	1009.6	93	0.4	982.2	100	0	6	1
2018	12	31	21:00	UTC	8	982.7	91	0	5	0.7	8	1007.6	89	0.8	983	100	0	6	1
2018	12	31	22:00	UTC	8	983.5	97	0.5	5	0.3	8	1005.4	96	0.3	983.8	100	0	6	1.4
2018	12	31	23:00	UTC	8	984.6	98	0.6	6	0.4	8	1002.9	97	0.4	984.9	100	0	6	0.9
2019	1	1	00:00	UTC	8	986	97	1.1	7	0.8	8	1000.8	96	0.6	986.5	100	0.3	6	1
2019	1	1	01:00	UTC	8	987.4	97	2.4	7	1.5	8	998.6	96	1.3	988	99	0.4	6	0.7
2019	1	1	02:00	UTC	8	988.9	98	0.8	7	2	8	996.4	97	2	989.5	98	0.4	7	0.4
2019	1	1	03:00	UTC	8	990.8	98	0	6	2.4	8	994.2	97	2.4	991.6	97	1.3	6	-0.8
2019	1	1	04:00	UTC	8	992.9	98	0.5	6	2.5	8	991.9	97	2.4	993.6	89	0	7	-1.9
2019	1	1	05:00	UTC	8	994.9	98	0.2	5	2.7	8	990	98	2.6	995.7	85	0	7	-2.3
2019	1	1	06:00	UTC	8	997	99	0.3	5	2.8	8	988.1	98	2.8	997.8	86	0	7	-2.3
2019	1	1	07:00	UTC	8	998.8	98	0.7	5	2.7	8	986.3	97	2.9	999.7	89	0.1	7	-2.8
2019	1	1	08:00	UTC	8	1000.7	98	0	5	2.8	8	984.7	97	2.9	1001.6	88	0	7	-3.3
2019	1	1	09:00	UTC	8	1002.4	99	0.5	4	3.1	8	983.3	97	3.1	1003	84	0	6	-3.6
2019	1	1	10:00	UTC	8	1003.5	99	0	4	3.5	8	981.7	98	3.3	1004.3	85	0	6	-3.8
2019	1	1	11:00	UTC	8	1004.6	98	0	4	4	8	980.8	98	3.8	1005.4	88	0.6	7	-4.3
2019	1	1	12:00	UTC	7	1005.8	99	0	4	3.5	8	980.6	97	3.8	1006.7	84	0	6	-4.3
2019	1	1	13:00	UTC	8	1007.4	98	0	4	3.1	7	980.6	97	3.5	1008.1	81	0	7	-4.5
2019	1	1	14:00	UTC	8	1008.8	98	0	4	2.7	8	980.6	95	3.1	1009.6	76	0	7	-5.1
2019	1	1	15:00	UTC	7	1010.2	98	0	4	2.5	7	980.5	96	2.6	1011	68	0	6	-5.9
2019	1	1	16:00	UTC	8	1011.4	98	0	4	2.3	8	980.6	95	2.6	1012.1	68	0	6	-6.6
2019	1	1	17:00	UTC	5	1012.1	98	0	4	1.8	7	980.8	95	2.2	1012.7	67	0	6	-6.8
2019	1	1	18:00	UTC	8	1012.9	96	0	4	1.7	8	981.2	97	1.6	1013.6	70	0	6	-7.2
2019	1	1	19:00	UTC	8	1013.9	96	0	4	1.6	8	981.5	98	1.1	1014.5	71	0	6	-7.5
2019	1	1	20:00	UTC	8	1014.8	96	0	4	1.5	8	982.1	99	0.7	1015.2	74	0	7	-7.6
2019	1	1	21:00	UTC	8	1015.7	97	0	4	1.1	8	982.8	98	1.1	1016.1	72	0	6	-7.6
2019	1	1	22:00	UTC	7	1016.6	98	0	4	1.3	8	983.7	98	1.1	1017.1	69	0	6	-7.5
2019	1	1	23:00	UTC	7	1017.2	97	0	4	1.3	8	984.7	97	1.1	1017.7	70	0	6	-7.8
2019	1	2	00:00	UTC	8	1018.1	96	0	4	1.4	7	986.1	98	1.2	1018.6	68	0	7	-7.8
2019	1	2	01:00	UTC	8	1018.6	97	0.3	4	1.3	8	987.6	97	1.3	1019.2	71	0	7	-8.3
2019	1	2	02:00	UTC	8	1019.7	95	0.3	4	0.8	8	989	94	0.8	1020.2	74	0	7	-8.5
2019	1	2	03:00	UTC	8	1020.6	94	0.3	4	0.4	8	990.9	94	0.1	1021.1	79	0	7	-9
2019	1	2	04:00	UTC	8	1021.6	87	0	4	-1.2	8	993.1	87	-1.5	1022.1	81	0	7	-9.3
2019	1	2	05:00	UTC	8	1022.6	82	0	3	-1.8	8	995.2	82	-2	1023.2	83	0	7	-9.8
2019	1	2	06:00	UTC	8	1023.3	79	0	3	-1.7	8	997.2	81	-1.9	1024	80	0	7	-9.5
2019	1	2	07:00	UTC	7	1024.5	88	0.3	4	-2.4	8	999	86	-2.4	1025.3	82	0	7	-10.3
2019	1	2	08:00	UTC	7	1025.4	84	0.4	4	-2.8	8	1000.8	84	-2.8	1026.2	83	0	7	-10.5
2019	1	2	09:00	UTC	8	1026.3	80	0	4	-3	8	1002.4	79	-3	1026.9	81	0	7	-10
2019	1	2	10:00	UTC	8	1026.5	79	0	4	-3.2	8	1003.5	80	-3.1	1027	81	0	7	-9.5
2019	1	2	11:00	UTC	7	1026.7	83	0.4	4	-3.7	8	1004.7	83	-3.7	1027.2	77	0	7	-9
2019	1	2	12:00	UTC	8	1026.7	82	0.5	4	-4	8	1006.1	81	-3.9	1027.3	77	0	7	-9.2
2019	1	2	13:00	UTC	7	1026.9	78	0	4	-4	8	1007.5	79	-4	1027.5	81	0	7	-10
2019	1	2	14:00	UTC	8	1027.6	70	0	4	-4.2	8	1008.8	71	-4.3	1028	85	0	7	-11.2
2019	1	2	15:00	UTC	7	1027.1	65	0	4	-5	8	1010.2	65	-5	1027.6	88	0	7	-12.2
2019	1	2	16:00	UTC	7	1027.3	61	0	4	-5.7	7	1011.4	62	-5.8	1027.8	88	0	7	-12.3
2019	1	2	17:00	UTC	7	1027.4	61	0	4	-6	7	1012.1	63	-6.3	1027.5	90	0	7	-12.9
2019	1	2	18:00	UTC	1	1026.6	64	0	4	-6.5	3	1013.1	65	-6.7	1026.7	91	0	7	-13.6
2019	1	2	19:00	UTC	0	1025.9	65	0	4	-6.8	0	1013.9	67	-7	1026	90	0	7	-13.9
2019	1	2	20:00	UTC	0	1024.9	68	0	4	-6.8	0	1014.8	69	-7	1024.9	91	0	7	-13.9
2019	1	2	21:00	UTC	0	1024	69	0	4	-6.9	0	1015.8	70	-7.2	1024.1	90	0	7	-13.9
2019	1	2	22:00	UTC	0	1022.5	66	0	4	-6.9	0	1016.6	67	-7.1	1022.4	90	0	7	-11.9
2019	1	2	23:00	UTC	0	1021.3	67	0	4	-7.1	0	1017.2	69	-7.6	1021.5	88	0	7	-10.6
2019	1	3	00:00	UTC	0	1020.3	66	0	4	-7.4	0	1018.2	69	-7.9	1020.4	91	0	7	-9.3
2019	1	3	01:00	UTC	0	1019	66	0	4	-7.5	0	1018.7	69	-7.9	1019	94	0	7	-8.2
2019	1	3	02:00	UTC	0	1017.5	69	0	4	-7.7	0	1019.8	71	-8	1017.3	90	0	7	-6.2
2019	1	3	03:00	UTC	0	1015.7	74	0	4	-8.2	0	1020.7	75	-8.4	1015.5	97	0.4	7	-4
2019	1	3	04:00	UTC	0	1014.1	76	0	4	-8.5	0	1021.6	77	-8.8	1013.9	96	0	8	-2.3
2019	1	3	05:00	UTC	0	1012.6	78	0	4	-8.9	0	1022.6	78	-9.1	1012.1	97	0.4	8	-2
2019	1	3	06:00	UTC	0	1011.3	78	0	4	-9.1	0	1023.6	77	-9.2	1011	97	0	8	-1.7
2019	1	3	07:00	UTC	0	1010.3	76	0	4	-8.9	0	1024.8	76	-9.4	1010	98	0	8	-1.3
2019	1	3	08:00	UTC	0	1009.4	76	0	4	-9.1	0	1025.7	77	-9.6	1009.2	100	0	8	-0.7
2019	1	3	09:00	UTC	0	1008.8	76	0	4	-9.1	0	1026.5	75	-9	1008.9	100	0	9	-0.2
2019	1	3	10:00	UTC	0	1007.8	75	0	4	-8.7	0	1026.7	76	-8.8	1007.7	100	0.3	10	0
2019	1	3	11:00	UTC	0	1006.5	75	0	4	-8.4	0	1026.8	75	-8.6	1006.4	100	0	10	0.2
2019	1	3	12:00	UTC	0	1006	72	0	4	-8.1	0	1026.8	72	-8.1	1006.2	100	0	10	0.2
2019	1	3	13:00	UTC	0	1005.8	75	0	4	-8.9	0	1027.1	76	-9.2	1006	100	0	10	0.2
2019	1	3	14:00	UTC	0	1005.8	79	0	4	-9.9	0	1027.8	79	-10.1	1006	100	0.3	10	0.1
2019	1	3	15:00	UTC	0	1006	82	0	4	-10.7	0	1027.2	84	-11.6	1006.3	100	0	10	-0.1
2019	1	3	16:00	UTC	0	1006.2	85	0	4	-11.3	0	1027.4	86	-12	1006.6	98	0	10	-0.5
2019	1	3	17:00	UTC	0	1006.5	86	0	4	-11.6	0	1027.6	86	-12.5	1006.8	97	0	10	-0.9
2019	1	3	18:00	UTC	0	1006.9	89	0	4	-12.3	0	1026.7	88	-13.4	1007.3	96	0	10	-1.3
2019	1	3	19:00	UTC	0	1007.5	89	0	4	-12.9	0	1026	89	-13.4	1007.9	92	0	10	-1.6
2019	1	3	20:00	UTC	5	1008	90	0	4	-13.2	4	1024.9	88	-14.1	1008.6	91	0	10	-2.7
2019	1	3	21:00	UTC	3	1008.6	90	0	4	-12.4	7	1024.2	89	-13.7	1009	92	0	10	-2.9
2019	1	3	22:00	UTC	7	1009.3	88	0	4	-11.2	8	1022.6	87	-12.1	1009.9	90	0	10	-3.5
2019	1	3	23:00	UTC	8	1010.1	89	0	4	-9.8	8	1021.4	88	-10.9	1010.5	92	0	10	-3.9
2019	1	4	00:00	UTC	8	1010.8	91	0	4	-7.8	8	1020.3	89	-9.9	1011.3	93	0	10	-4.2
2019	1	4	01:00	UTC	8	1011.7	87	0	4	-5.7	8	1019.2	90	-8.8	1012.1	95	0	9	-4.5
2019	1	4	02:00	UTC	8	1012.2	84	0	4	-3.8	8	1017.5	88	-5.6	1012.8	93	0	9	-4.9
2019	1	4	03:00	UTC	8	1013	88	1.2	4	-2	8	1015.6	88	-2.2	1013.4	93	0	9	-5.2
2019	1	4	04:00	UTC	7	1013.7	94	1.4	5	-2	8	1014.1	92	-1.8	1014.3	94	0	9	-5.4
2019	1	4	05:00	UTC	8	1014.6	96	1	5	-1.8	8	1012.4	94	-1.9	1015	91	0	9	-5.6
2019	1	4	06:00	UTC	8	1015.6	96	0.3	7	-1.5	8	1011.1	94	-1.5	1016.1	91	0	9	-5.7
2019	1	4	07:00	UTC	8	1016.3	97	0.3	8	-0.9	8	1010.2	95	-0.8	1016.8	90	0	9	-5.7
2019	1	4	08:00	UTC	8	1016.8	97	0	8	-0.1	8	1009.3	95	0	1017.4	90	0	9	-5.8
2019	1	4	09:00	UTC	8	1017.8	98	0	8	0.4	8	1008.9	97	0.5	1018.3	90	0	9	-5.7
2019	1	4	10:00	UTC	8	1018.2	99	0.7	9	0.7	8	1007.8	98	0.7	1018.5	89	0	9	-5.7
2019	1	4	11:00	UTC	7	1018.2	99	0	9	0.7	8	1006.7	97	0.8	1018.5	88	0	9	-5.6
2019	1	4	12:00	UTC	8	1018.7	99	0	9	0.5	8	1006.1	98	0.5	1019.1	88	0	9	-5.5
2019	1	4	13:00	UTC	8	1019.2	99	0	8	0.4	8	1005.9	98	0.4	1019.6	89	0	9	-5.7
2019	1	4	14:00	UTC	8	1019.6	99	0	8	0.5	8	1005.9	99	0.4	1020.1	90	0	9	-5.5
2019	1	4	15:00	UTC	8	1020.1	97	0	8	0.5	8	1006.1	96	0.4	1020.3	90	0	9	-5.6
2019	1	4	16:00	UTC	8	1020.8	94	0	8	0.2	8	1006.3	94	0	1021.2	92	0	9	-5.6
2019	1	4	17:00	UTC	8	1021.2	92	0	8	-0.2	8	1006.5	93	-0.3	1021.5	90	0	9	-5.8
2019	1	4	18:00	UTC	8	1021.5	92	0	8	-0.6	8	1007	92	-0.8	1021.8	88	0	9	-6.1
2019	1	4	19:00	UTC	8	1021.9	94	0	8	-1.1	8	1007.7	91	-1.3	1022.3	90	0	9	-6.2
2019	1	4	20:00	UTC	8	1022.3	89	0	8	-1.6	8	1008.2	87	-1.9	1022.5	93	0	9	-6.6
2019	1	4	21:00	UTC	8	1022.3	88	0	8	-2.4	8	1008.7	87	-2.4	1022.6	93	0	9	-6.7
2019	1	4	22:00	UTC	8	1022.5	86	0	8	-2.8	8	1009.4	86	-3	1022.7	94	0	9	-7.1
2019	1	4	23:00	UTC	7	1022.7	86	0	8	-3.2	8	1010.3	86	-3.2	1022.9	94	0	9	-7.3
2019	1	5	00:00	UTC	8	1022.9	89	0	8	-3.6	8	1011	88	-3.7	1023.1	95	0	9	-7.6
2019	1	5	01:00	UTC	7	1023	88	0	8	-3.9	8	1011.9	89	-4.2	1023.1	96	0	10	-7.4
2019	1	5	02:00	UTC	8	1023	88	0	8	-4.2	8	1012.5	88	-4.4	1023.2	98	0	10	-7.5
2019	1	5	03:00	UTC	7	1023.2	89	0	8	-4.5	8	1013.2	90	-4.7	1023.3	99	0	10	-7.5
2019	1	5	04:00	UTC	8	1023.1	89	0	8	-4.8	8	1013.9	89	-4.9	1023.3	97	0	10	-7.4
2019	1	5	05:00	UTC	8	1023.2	87	0	8	-5	8	1014.8	87	-5.2	1023.3	97	0	10	-7.3
2019	1	5	06:00	UTC	8	1023.2	87	0	8	-5.2	8	1015.8	86	-5.3	1023.4	96	0	10	-7.3
2019	1	5	07:00	UTC	8	1023.5	85	0	8	-5.1	8	1016.4	85	-5.3	1023.5	96	0	10	-7.2
2019	1	5	08:00	UTC	8	1023.6	85	0	8	-5.1	8	1017.1	85	-5.3	1023.5	96	0	9	-6.7
2019	1	5	09:00	UTC	8	1023.6	85	0	8	-5.1	8	1017.9	85	-5.2	1023.6	95	0	10	-6.3
2019	1	5	10:00	UTC	8	1023.4	84	0	8	-5	8	1018.4	84	-5.1	1023.4	93	0	9	-5.6
2019	1	5	11:00	UTC	5	1023.1	84	0	8	-5.2	7	1018.3	83	-5.1	1023.1	90	0	9	-4.8
2019	1	5	12:00	UTC	7	1023.1	84	0	8	-5.2	7	1018.8	84	-5.3	1023.1	89	0	9	-4.1
2019	1	5	13:00	UTC	5	1022.8	83	0	8	-5.2	6	1019.4	84	-5.5	1023	86	0	9	-3.6
2019	1	5	14:00	UTC	7	1022.7	86	0	8	-5.6	8	1019.7	86	-5.5	1022.8	88	0	9	-3
2019	1	5	15:00	UTC	7	1022.5	85	0	8	-5.1	8	1020.1	85	-5.2	1022.4	88	0	9	-2.6
2019	1	5	16:00	UTC	8	1022.2	86	0	8	-5.1	8	1020.9	86	-5.3	1022.1	88	0	9	-2.1
2019	1	5	17:00	UTC	8	1021.8	86	0	8	-5.1	8	1021.3	86	-5.3	1021.6	89	0	9	-1.6
2019	1	5	18:00	UTC	7	1021.2	86	0	8	-5.3	8	1021.6	85	-5.5	1021.1	92	0	9	-1
2019	1	5	19:00	UTC	8	1020.7	84	0	8	-5.7	8	1022	84	-5.8	1020.4	98	0	9	-0.8
2019	1	5	20:00	UTC	7	1020.2	85	0	8	-5.9	8	1022.3	85	-6.1	1020.2	99	0.5	9	-1
2019	1	5	21:00	UTC	7	1019.9	87	0	8	-6.2	8	1022.4	86	-6.2	1019.7	100	0	9	-0.7
2019	1	5	22:00	UTC	8	1019.1	88	0	8	-6.5	8	1022.6	88	-6.5	1019	100	0	9	-0.2
2019	1	5	23:00	UTC	8	1018.4	89	0	8	-6.8	8	1022.7	90	-6.8	1018.2	100	0	9	0
2019	1	6	00:00	UTC	8	1017.9	92	0	8	-7.1	8	1022.9	91	-7.1	1017.6	100	0	10	0.5
2019	1	6	01:00	UTC	7	1017.2	92	0	8	-7.5	8	1023	91	-7.2	1017.1	100	0	10	0.9
2019	1	6	02:00	UTC	8	1016.6	93	0	8	-7.3	8	1023.1	94	-7.1	1016.5	100	0.5	10	1.3
2019	1	6	03:00	UTC	8	1015.9	93	0	8	-7.3	8	1023.2	92	-7.1	1015.9	100	0	9	1.3
2019	1	6	04:00	UTC	8	1015.3	94	0	8	-7	8	1023.1	93	-7	1015.2	100	0	9	1.4
2019	1	6	05:00	UTC	8	1014.7	91	0	8	-6.7	8	1023.3	91	-6.8	1014.6	100	0	9	1.4
2019	1	6	06:00	UTC	8	1014.7	89	0	8	-6.4	8	1023.3	91	-6.5	1014.7	100	0	9	1.4
2019	1	6	07:00	UTC	8	1014.5	90	0	8	-6.2	8	1023.6	90	-6.4	1014.4	100	0	9	1.2
2019	1	6	08:00	UTC	8	1014.4	89	0	8	-5.8	8	1023.6	89	-6	1014.3	100	0	9	1.2
2019	1	6	09:00	UTC	8	1014.1	87	0	8	-5.1	8	1023.7	87	-5.4	1014.1	100	0	8	1.7
2019	1	6	10:00	UTC	8	1013.9	86	0	8	-4.8	8	1023.4	87	-5.1	1013.9	100	0	8	1.7
2019	1	6	11:00	UTC	8	1013.6	85	0	8	-4.1	8	1023.1	85	-4.5	1013.5	100	0	8	1.7
2019	1	6	12:00	UTC	8	1013.3	83	0	8	-3.4	8	1023.1	84	-3.9	1013.3	100	0	8	1.4
2019	1	6	13:00	UTC	8	1013.1	84	0	8	-2.8	8	1023	82	-3	1013.1	100	0	7	1.2
2019	1	6	14:00	UTC	8	1013.1	84	0	7	-2.2	8	1022.8	83	-2.5	1013	100	0	8	0.7
2019	1	6	15:00	UTC	8	1012.5	85	0	7	-1.8	8	1022.5	83	-1.8	1012.6	97	0	8	0.6
2019	1	6	16:00	UTC	8	1012.3	87	0	8	-1.2	8	1022.1	82	-1.2	1012.3	97	0	7	0.1
2019	1	6	17:00	UTC	8	1011.9	85	0	7	-0.5	8	1021.7	84	-0.4	1012	97	0	8	-0.2
2019	1	6	18:00	UTC	8	1011.1	90	0	7	-0.1	8	1021.1	87	0	1011.2	98	0	8	-0.6
2019	1	6	19:00	UTC	8	1010.4	95	0.5	8	-0.7	8	1020.6	93	-0.3	1010.4	97	0	8	-0.6
2019	1	6	20:00	UTC	8	1009.8	94	0.4	7	-0.5	8	1020.2	93	-0.4	1009.8	99	0	8	-0.8
2019	1	6	21:00	UTC	8	1009.1	97	0.1	8	-0.3	8	1019.8	95	-0.1	1009.1	100	0	8	-0.9
2019	1	6	22:00	UTC	8	1008.4	98	0	8	0.2	8	1019.1	96	0.3	1008.4	100	0	8	-1.1
2019	1	6	23:00	UTC	8	1007.5	99	0.2	8	0.7	8	1018.4	97	0.7	1007.5	100	0	8	-1
2019	1	7	00:00	UTC	8	1006.6	99	0	8	1	8	1017.9	97	1	1006.6	100	0	8	-1
2019	1	7	01:00	UTC	9	1005.6	99	0	8	1.1	8	1017.2	98	1.4	1005.6	100	0	8	-0.9
2019	1	7	02:00	UTC	8	1004.5	100	0	7	1.6	8	1016.6	97	1.8	1004.5	100	0.8	8	-0.9
2019	1	7	03:00	UTC	8	1003.3	99	0.4	7	1.9	8	1015.9	97	2.1	1003.3	100	0.3	8	-0.3
2019	1	7	04:00	UTC	8	1002.4	100	0	7	1.9	8	1015.2	98	2.1	1002.5	100	2	8	0
2019	1	7	05:00	UTC	8	1001.8	99	0	7	2	8	1014.7	98	2	1001.7	100	0.7	10	0.1
2019	1	7	06:00	UTC	8	1001.2	99	0	6	1.8	8	1014.7	98	1.9	1001.2	100	0.4	10	0.1
2019	1	7	07:00	UTC	8	1000.9	99	0	6	1.6	8	1014.5	98	1.6	1000.9	100	0.4	11	0.2
2019	1	7	08:00	UTC	8	1000.8	100	0	6	1.7	8	1014.3	99	1.6	1000.8	100	0	12	0.4
2019	1	7	09:00	UTC	7	1000.5	100	0	6	1.8	8	1014.1	98	1.9	1000.6	100	0.4	12	0.6
2019	1	7	10:00	UTC	8	1000.3	99	0	5	1.9	8	1013.9	97	2.1	1000.3	100	0	12	0.7
2019	1	7	11:00	UTC	8	1000.1	98	0	5	2	8	1013.5	96	2.1	1000.1	100	0.4	12	0.7
2019	1	7	12:00	UTC	8	999.8	98	0	5	1.8	8	1013.3	97	1.9	999.8	100	0	11	0.5
2019	1	7	13:00	UTC	8	999.6	98	0	5	1.6	8	1013.1	97	1.7	999.8	100	0.3	11	0.2
2019	1	7	14:00	UTC	8	999.6	97	0	5	1.2	8	1013	95	1.4	999.7	100	0	11	0.1
2019	1	7	15:00	UTC	8	999.7	95	0	5	1	8	1012.7	94	1.1	999.8	100	0	11	-0.1
2019	1	7	16:00	UTC	7	999.9	95	0	5	0.3	8	1012.4	93	0.7	1000.1	100	0.2	11	-0.3
2019	1	7	17:00	UTC	5	1000	95	0	5	-0.1	8	1012	93	0.2	1000.2	100	0.3	11	-0.3
2019	1	7	18:00	UTC	7	1000.3	97	0	5	-0.5	8	1011.2	94	-0.3	1000.4	100	0.2	11	-0.4
2019	1	7	19:00	UTC	7	1000.5	96	0	5	-0.6	8	1010.5	95	-0.5	1000.7	100	0.5	11	-0.5
2019	1	7	20:00	UTC	7	1000.7	97	0	5	-0.7	8	1009.8	95	-0.5	1000.9	100	0.4	11	-0.6
2019	1	7	21:00	UTC	7	1001	97	0	5	-0.8	8	1009.1	95	-0.6	1001.2	100	1	15	-0.7
2019	1	7	22:00	UTC	5	1001.3	98	0	5	-0.9	8	1008.4	96	-0.9	1001.5	100	0.4	15	-0.8
2019	1	7	23:00	UTC	7	1001.7	99	0	5	-0.9	8	1007.5	97	-0.8	1001.9	100	0.8	16	-0.8
2019	1	8	00:00	UTC	9	1002.2	99	0	5	-0.9	8	1006.7	98	-0.8	1002.4	100	0.4	18	-1
2019	1	8	01:00	UTC	9	1002.7	99	0	5	-0.7	9	1005.7	99	-0.7	1003	100	0.7	18	-1.1
2019	1	8	02:00	UTC	7	1003.2	100	0.2	5	0.1	8	1004.6	99	-0.2	1003.5	100	0.4	20	-1
2019	1	8	03:00	UTC	7	1003.7	99	0.4	5	0.3	8	1003.4	99	0.3	1004	100	0.4	20	-1
2019	1	8	04:00	UTC	7	1004.3	99	0.8	5	0.3	8	1002.5	99	0.4	1004.6	100	0.7	21	-1
2019	1	8	05:00	UTC	7	1004.9	99	0.7	6	0.2	8	1001.8	98	0.2	1005.2	100	0.4	21	-1.5
2019	1	8	06:00	UTC	7	1005.5	100	0.8	6	0.3	8	1001.3	98	0.3	1005.9	99	0.3	22	-1.7
2019	1	8	07:00	UTC	7	1006.4	99	0.3	7	0.7	8	1001	98	0.5	1006.8	98	0	22	-2
2019	1	8	08:00	UTC	7	1007.3	99	0.5	7	1.1	8	1000.9	97	0.5	1007.7	97	0	22	-2.2
2019	1	8	09:00	UTC	7	1008.3	98	0.3	7	1	8	1000.6	98	0.9	1008.7	97	0.3	22	-2.3
2019	1	8	10:00	UTC	7	1009	98	0.3	7	0.8	8	1000.4	97	0.7	1009.4	96	0	22	-2.6
2019	1	8	11:00	UTC	7	1009.5	98	0.3	7	0.7	8	1000.1	97	0.6	1009.9	96	0	22	-2.6
2019	1	8	12:00	UTC	7	1010.1	97	0.7	7	0.5	8	999.9	97	0.5	1010.4	97	0	22	-2.4
2019	1	8	13:00	UTC	7	1010.8	98	0.3	6	0.3	8	999.7	97	0.4	1011	95	0	22	-2
2019	1	8	14:00	UTC	7	1011.3	98	0.2	6	0.1	8	999.7	97	0.2	1011.9	98	0	22	-3.6
2019	1	8	15:00	UTC	7	1012.2	99	0	6	0	8	999.8	97	0	1012.8	97	0	22	-4.7
2019	1	8	16:00	UTC	7	1013.1	98	0	6	-0.1	8	1000	97	-0.1	1013.5	96	0	22	-4.6
2019	1	8	17:00	UTC	7	1013.7	98	0.3	7	-0.1	8	1000.1	97	-0.1	1014	95	0	22	-4.2
2019	1	8	18:00	UTC	7	1014	99	0.7	7	-0.2	8	1000.3	98	-0.1	1014.2	94	0	22	-4
2019	1	8	19:00	UTC	7	1014.6	99	0.7	10	-0.3	8	1000.6	98	-0.3	1014.9	92	0	22	-4
2019	1	8	20:00	UTC	7	1015.1	99	0.8	11	-0.4	8	1000.8	98	-0.4	1015.4	93	0	21	-3.6
2019	1	8	21:00	UTC	7	1015.7	99	1	12	-0.6	8	1001.1	98	-0.4	1016.1	91	0	21	-3.7
2019	1	8	22:00	UTC	7	1016.3	99	0.8	15	-0.6	8	1001.4	98	-0.6	1016.5	94	0	21	-3.8
2019	1	8	23:00	UTC	7	1016.8	99	0.8	17	-0.7	8	1001.8	98	-0.6	1017	91	0	21	-3.6
2019	1	9	00:00	UTC	7	1017.1	99	0.3	17	-0.8	8	1002.3	98	-0.7	1017.4	91	0	21	-3.8
2019	1	9	01:00	UTC	8	1017.6	99	0.5	17	-0.7	8	1002.9	98	-0.6	1017.8	93	0	21	-4.1
2019	1	9	02:00	UTC	8	1017.6	99	0.7	18	-0.7	8	1003.4	98	-0.7	1017.9	94	0	21	-4.4
2019	1	9	03:00	UTC	7	1017.9	99	0.7	18	-0.7	8	1003.9	98	-0.7	1018.3	95	0	21	-5.2
2019	1	9	04:00	UTC	7	1018.4	99	0.5	18	-0.7	8	1004.4	98	-0.8	1018.6	97	0	21	-5.6
2019	1	9	05:00	UTC	7	1018.7	99	0	18	-0.8	8	1005	97	-0.8	1018.9	96	0	21	-6
2019	1	9	06:00	UTC	7	1018.9	98	0.5	18	-0.7	8	1005.6	97	-1	1019.2	97	0	21	-6.4
2019	1	9	07:00	UTC	7	1019.4	97	0.3	19	-1.1	8	1006.5	96	-1.4	1019.7	97	0	21	-6.8
2019	1	9	08:00	UTC	7	1019.6	96	0	19	-1.4	8	1007.4	95	-1.7	1019.8	97	0	21	-6.9
2019	1	9	09:00	UTC	7	1019.6	95	0	19	-1.5	8	1008.4	94	-1.7	1019.7	97	0	21	-7.1
2019	1	9	10:00	UTC	7	1019.5	94	0.3	19	-1.6	8	1009.1	93	-1.9	1019.6	97	0	21	-7.2
2019	1	9	11:00	UTC	7	1018.9	93	0.5	19	-2.1	8	1009.6	93	-2.2	1019.1	96	0	21	-6.9
2019	1	9	12:00	UTC	7	1018.8	94	0	19	-2.2	8	1010.3	93	-2.3	1019.1	93	0	20	-6.7
2019	1	9	13:00	UTC	8	1018.4	95	0	19	-1.9	8	1010.8	94	-2	1018.4	98	0	20	-6.7
2019	1	9	14:00	UTC	8	1017.8	93	0	19	-2	8	1011.4	92	-1.9	1017.9	97	0	20	-6.9
2019	1	9	15:00	UTC	8	1017	94	0	19	-3.3	8	1012.3	93	-3.8	1017.1	98	0	20	-7
2019	1	9	16:00	UTC	8	1016.3	93	0	19	-4.3	8	1013.2	92	-4.4	1016.3	98	0	20	-6.4
2019	1	9	17:00	UTC	8	1015.5	92	0	19	-4	8	1013.7	91	-4.1	1015.6	98	0	20	-6.1
2019	1	9	18:00	UTC	8	1014.3	92	0	19	-3.8	8	1014.1	91	-3.8	1014.2	98	0	20	-5.6
2019	1	9	19:00	UTC	8	1013.2	91	0	19	-3.8	8	1014.6	90	-3.9	1013	98	0	20	-4.5
2019	1	9	20:00	UTC	8	1011.6	90	0	19	-3.6	8	1015.2	90	-3.6	1011.5	95	0	20	-3.6
2019	1	9	21:00	UTC	8	1010.2	88	0	19	-3.4	8	1015.8	88	-3.5	1010.1	93	0	20	-2.2
2019	1	9	22:00	UTC	8	1008.9	88	0	19	-3.4	8	1016.3	88	-3.5	1008.6	96	0	20	-1.3
2019	1	9	23:00	UTC	8	1007.2	90	0	19	-3.3	8	1016.8	87	-3.3	1006.8	97	0	19	-1
2019	1	10	00:00	UTC	8	1005.3	88	0	19	-3.3	8	1017.1	88	-3.3	1017.4	91	0	21	-3.8
2019	1	10	01:00	UTC	8	1003.4	88	0	18	-3.4	8	1017.6	87	-3.5	1017.8	93	0	21	-4.1
2019	1	10	02:00	UTC	8	1001.6	90	0	18	-3.7	8	1017.7	87	-3.9	1017.9	94	0	21	-4.4
2019	1	10	03:00	UTC	8	999.9	90	0	18	-4.2	8	1017.9	89	-4.5	1018.3	95	0	21	-5.2
2019	1	10	04:00	UTC	8	998.8	91	0	18	-4.9	8	1018.4	91	-5.1	1018.6	97	0	21	-5.6
2019	1	10	05:00	UTC	8	997.5	92	0	18	-5.4	8	1018.8	91	-5.5	1018.9	96	0	21	-6
2019	1	10	06:00	UTC	7	996.8	92	0	18	-5.6	8	1019	91	-5.9	1019.2	97	0	21	-6.4
2019	1	10	07:00	UTC	7	996	91	0	18	-5.6	8	1019.5	91	-6.3	1019.7	97	0	21	-6.8
2019	1	10	08:00	UTC	8	995.4	91	0	18	-5.9	8	1019.6	92	-6.4	1019.8	97	0	21	-6.9
2019	1	10	09:00	UTC	8	994.7	92	0	18	-6.3	8	1019.6	92	-6.5	1019.7	97	0	21	-7.1
2019	1	10	10:00	UTC	8	994.4	91	0	18	-6.2	8	1019.5	92	-6.5	1019.6	97	0	21	-7.2
2019	1	10	11:00	UTC	7	993.5	92	0	18	-5.9	8	1019	91	-6.2	1019.1	96	0	21	-6.9
2019	1	10	12:00	UTC	8	992.8	92	0	18	-5.8	8	1019	91	-6	1019.1	93	0	20	-6.7
2019	1	10	13:00	UTC	8	992.4	93	0	18	-5.6	8	1018.4	91	-5.9	1018.4	98	0	20	-6.7
2019	1	10	14:00	UTC	8	991.2	95	0	18	-6	8	1017.8	94	-5.9	1017.9	97	0	20	-6.9
2019	1	10	15:00	UTC	8	990.6	95	0	18	-5.7	8	1017.1	94	-5.9	1017.1	98	0	20	-7
2019	1	10	16:00	UTC	8	989.9	94	0	18	-5	8	1016.4	93	-5.3	1016.3	98	0	20	-6.4
2019	1	10	17:00	UTC	8	989.7	93	0	17	-4.9	8	1015.5	92	-4.9	1015.6	98	0	20	-6.1
2019	1	10	18:00	UTC	8	989.5	92	0	17	-4.4	8	1014.3	91	-4.5	1014.2	98	0	20	-5.6
2019	1	10	19:00	UTC	8	989.1	92	0	17	-3.6	8	1013.2	90	-3.7	1013	98	0	20	-4.5
2019	1	10	20:00	UTC	8	989.2	87	0	17	-1.6	8	1011.6	86	-2	1011.5	95	0	20	-3.6
2019	1	10	21:00	UTC	8	989.5	85	0	17	-0.6	7	1010.1	82	-0.5	1010.1	93	0	20	-2.2
2019	1	10	22:00	UTC	8	989.9	91	4.7	17	-0.6	8	1008.9	89	-0.6	1008.6	96	0	20	-1.3
2019	1	10	23:00	UTC	8	990.3	92	0	17	-0.5	8	1007.1	91	-0.5	1006.8	97	0	19	-1
2019	1	11	00:00	UTC	8	990.7	97	1.1	16	-0.3	8	1005.2	94	-0.1	1005	99	0	20	-0.5
2019	1	11	01:00	UTC	8	991.1	99	0.2	17	-0.1	8	1003.3	93	0.4	1003	96	0	20	0.2
2019	1	11	02:00	UTC	8	991.8	97	0	16	0.6	8	1001.5	90	0.9	1001.1	93	0	20	0.5
2019	1	11	03:00	UTC	8	991.9	95	0	17	0.8	8	1000	90	1	1000.1	94	0	20	0.7
2019	1	11	04:00	UTC	8	992	97	0.5	18	0.6	8	998.8	94	0.8	998.3	100	0	20	0.4
2019	1	11	05:00	UTC	8	992.1	96	0.5	17	1.2	8	997.4	93	1.3	997.3	100	0	20	0.7
2019	1	11	06:00	UTC	8	992.3	95	0	17	1.5	8	996.8	94	1.5	996.7	99	0	20	0.9
2019	1	11	07:00	UTC	8	992.4	96	0	17	1.3	8	996	94	1.5	995.8	99	0	20	0.9
2019	1	11	08:00	UTC	8	992.5	96	0	16	1.1	8	995.3	93	1.3	995.1	99	0	19	0.8
2019	1	11	09:00	UTC	8	992.7	95	0	16	1.2	8	994.7	93	1.3	994.6	98	0	19	1
2019	1	11	10:00	UTC	1	992.5	93	0	16	1.1	3	994.2	90	1.3
2019	1	11	11:00	UTC	0	992.5	88	0	16	1.4	0	993.5	84	1.6	993.4	89	0	19	1.1	-0.5
2019	1	11	12:00	UTC	0	992.5	83	0	16	1.4	0	992.8	80	1.6	992.7	86	0	19	1	-1.1
2019	1	11	13:00	UTC	0	992.7	82	0	16	1.1	0	992.2	78	1.4	992.1	83	0	19	0.8	-1.8
2019	1	11	14:00	UTC	0	993	82	0	16	0.7	0	991.1	77	1.3	991	81	0	19	0.4	-2.4
2019	1	11	15:00	UTC	0	993	76	0	16	0.7	0	990.5	74	1.1	990.6	78	0	19	0.6	-2.7
2019	1	11	16:00	UTC	0	993	75	0	16	0.6	0	989.9	74	0.9	989.8	79	0	19	0.1	-3.2
2019	1	11	17:00	UTC	0	992.8	76	0	16	0.7	0	989.6	74	0.8	989.5	79	0	19	0.3	-2.9
2019	1	11	18:00	UTC	0	992.9	76	0	16	0.7	0	989.4	76	0.9	989.3	80	0	19	0.4	-2.6
2019	1	11	19:00	UTC	0	992.9	79	0	16	0.6	0	989	76	1.2	988.9	80	0	19	0.7	-2.3
2019	1	11	20:00	UTC	0	992.8	78	0	16	1	2	989	77	1.3	989	81	0	19	0.7	-2.1
2019	1	11	21:00	UTC	3	992.5	77	0	16	1.4	7	989.4	76	1.6	989.4	82	0	19	0.6	-2.1
2019	1	11	22:00	UTC	0	992.3	82	0	16	0.8	0	989.9	78	1.2	989.9	83	0	19	0.7	-1.8
2019	1	11	23:00	UTC	0	992	82	0	16	0.4	0	990.2	78	0.9	990.2	84	0	19	0.1	-2.4
2019	1	12	00:00	UTC	0	991.8	85	0	15	-0.8	0	990.6	81	0.3	990.8	87	0	18	-1.1	-3
2019	1	12	01:00	UTC	0	991.5	85	0	16	-1	0	991	81	-0.3	991.1	87	0	18	-1.4	-3.3
2019	1	12	02:00	UTC	0	991.3	84	0	16	-0.5	0	991.8	82	-0.3	991.8	86	0	18	-1.3	-3.3
2019	1	12	03:00	UTC	0	990.7	83	0	15	-0.9	1	991.9	82	-0.6	992	87	0	18	-1.5	-3.5
2019	1	12	04:00	UTC	1	990.1	84	0	15	-1.4	2	991.9	82	-0.7	992	87	0	18	-2	-3.8
2019	1	12	05:00	UTC	0	989.4	85	0	15	-1.5	4	992	81	-1.1	992.1	87	0	18	-2.2	-4
2019	1	12	06:00	UTC	0	988.8	86	0	15	-1.6	0	992.3	82	-1.6	992.3	89	0	18	-2.1	-3.7
2019	1	12	07:00	UTC	0	988.2	86	0	15	-2.4	0	992.3	84	-2	992.3	88	0	18	-3.2	-4.9
2019	1	12	08:00	UTC	0	987.6	86	0	15	-2.1	0	992.6	83	-1.8	992.7	90	0	18	-2.8	-4.2
2019	1	12	09:00	UTC	0	986.8	81	0	15	-1.5	0	992.7	79	-1.5	992.8	85	0	18	-2.5	-4.7
2019	1	12	10:00	UTC	0	985.9	77	0	15	-0.7	0	992.5	77	-0.9	992.5	82	0	18	-1.5	-4.2
2019	1	12	11:00	UTC	0	984.8	77	0	15	-0.6	0	992.4	75	-0.7	992.5	82	0	18	-1.6	-4.3
2019	1	12	12:00	UTC	0	983.8	79	0	15	-0.9	0	992.5	76	-0.8	992.5	83	0	18	-1.9	-4.3
2019	1	12	13:00	UTC	0	982.9	81	0	15	-1.3	0	992.6	80	-1.4	992.7	88	0	18	-3.1	-4.7
2019	1	12	14:00	UTC	0	981.9	87	0	15	-2.2	0	992.9	84	-1.9	993	93	0	18	-3.6	-4.6
2019	1	12	15:00	UTC	0	981.1	89	0	15	-2.8	0	993.1	87	-2.5	993.1	94	0	18	-4.2	-5.1
2019	1	12	16:00	UTC	0	980.4	93	0	15	-4	0	993	91	-3.6	993.1	95	0	18	-4.8	-5.4
2019	1	12	17:00	UTC	0	979.4	94	0	15	-4.5	0	992.9	91	-3.9	993.1	99	0	17	-5.9	-6.1
2019	1	12	18:00	UTC	0	978.6	92	0	15	-4.3	0	992.9	95	-6.1	993	99	0	18	-5.2	-5.3
2019	1	12	19:00	UTC	0	977.9	94	0	15	-4.9	0	993	98	-7.3	993	98	0	18	-6.8	-7.1
2019	1	12	20:00	UTC	0	977.2	95	0	15	-5.6	9	992.9	94	-11.1	992.9	99	0	17	-8	-8.1
2019	1	12	21:00	UTC	0	976.2	94	0	15	-6.1	2	992.6	94	-11.5	992.6	98	0	17	-9.1	-9.4
2019	1	12	22:00	UTC	3	975.2	94	0	15	-6.2	7	992.5	93	-12.2	992.5	98	0	17	-9.2	-9.4
2019	1	12	23:00	UTC	3	974.2	94	0	15	-6.5	6	992.2	92	-12.3	992.2	97	0	17	-9.3	-9.6
2019	1	13	00:00	UTC	3	973.3	94	0	15	-6.5	0	991.9	91	-12.6	992	98	0	17	-9.4	-9.7
2019	1	13	01:00	UTC	3	972.6	91	0	15	-6.3	0	991.6	90	-12.8	991.7	96	0	17	-10.4	-10.9
2019	1	13	02:00	UTC	7	972	91	0	15	-6.1	7	991.4	90	-12.4	991.4	96	0	18	-9.9	-10.4
2019	1	13	03:00	UTC	7	971.3	92	0	15	-6.3	7	990.8	90	-11.5	990.8	97	0	18	-9.7	-10.1
2019	1	13	04:00	UTC	7	970.8	91	0	15	-4.9	7	990.2	91	-10.3	990.3	96	0	18	-9	-9.4
2019	1	13	05:00	UTC	7	970.4	94	0	14	-4.3	8	989.6	92	-8.8	989.6	97	0	17	-7.7	-8.1
2019	1	13	06:00	UTC	7	970.1	96	0	14	-4.2	7	988.9	92	-8.7	989	97	0	18	-7.9	-8.3
2019	1	13	07:00	UTC	7	970.5	96	0	14	-4.1	7	988.4	92	-8.6	988.3	97	0	17	-7.2	-7.6
2019	1	13	08:00	UTC	3	970.6	97	0	14	-5.3	4	987.7	92	-9.1	987.7	98	0	17	-6.5	-6.7
2019	1	13	09:00	UTC	7	970.9	98	0	14	-4.1	9	986.9	92	-9.2	986.9	98	0	17	-5.9	-6.1
2019	1	13	10:00	UTC	7	971.3	94	0	14	-3.3	8	986	94	-6.2	985.9	99	0	17	-4.6	-4.7
2019	1	13	11:00	UTC	7	971.9	92	0	14	-2.4	7	984.9	96	-4.2	985	99	0	18	-4.7	-4.9
2019	1	13	12:00	UTC	7	972.6	94	0	14	-1.9	8	983.8	96	-3.7	983.9	100	0	17	-3.5	-3.5
2019	1	13	13:00	UTC	7	973.4	95	0	14	-1.7	8	982.9	96	-3.6	982.9	100	0	17	-2.9	-2.9
2019	1	13	14:00	UTC	7	974.3	97	0	14	-0.3	8	982.1	98	-1.5	982.1	100	0	17	-2.9	-2.9
2019	1	13	15:00	UTC	7	975.2	97	0.8	14	0.4	8	981.2	99	-0.2	981.2	100	0.7	17	-1.1	-1.1
2019	1	13	16:00	UTC	7	975.7	97	0.5	14	0.4	8	980.4	99	0.1	980.4	100	0.8	19	-0.4	-0.4
2019	1	13	17:00	UTC	7	976.4	95	0	15	0.3	7	979.5	98	0	979.4	100	0	18	-0.3	-0.3
2019	1	13	18:00	UTC	7	977.1	93	0	15	0.1	8	978.7	97	-0.1	978.6	100	0	19	-0.5	-0.5
2019	1	13	19:00	UTC	7	977.7	91	0	15	-0.3	7	977.9	95	-0.6	977.9	100	0	19	-0.9	-0.9
2019	1	13	20:00	UTC	7	978.2	91	0	15	-0.3	8	977.2	92	-0.6	977.3	100	0	19	-1	-1
2019	1	13	21:00	UTC	7	978.6	92	0	15	-0.5	8	976.4	92	-0.7	976.4	100	0	19	-1.3	-1.3
2019	1	13	22:00	UTC	8	979.2	92	0	15	-0.7	8	975.2	92	-0.9	975.3	98	0	19	-1.1	-1.5
2019	1	13	23:00	UTC	8	979.6	96	0.8	15	-1	8	974.3	94	-0.9	974.3	99	0.2	19	-1.6	-1.7
2019	1	14	00:00	UTC	8	980.3	98	0.4	16	-0.7	8	973.3	95	-0.8	973.5	100	0.6	20	-1.4	-1.5
2019	1	14	01:00	UTC	8	980.7	97	0.7	16	-0.6	8	972.6	95	-0.6	972.7	100	0.1	20	-1.3	-1.3
2019	1	14	02:00	UTC	8	981.2	98	0.7	17	-0.5	8	972.1	96	-0.5	972.2	100	0.7	21	-1.1	-1.1
2019	1	14	03:00	UTC	8	981.6	99	1.3	18	-0.1	8	971.4	97	-0.4	971.5	100	0.6	19	-1.1	-1.1
2019	1	14	04:00	UTC	7	982.2	98	1	19	0.1	8	970.9	98	-0.2	970.9	100	0.7	20	-1.2	-1.2
2019	1	14	05:00	UTC	7	982.5	98	0.5	19	-0.1	8	970.5	98	-0.2	970.6	100	0.8	20	-1	-1
2019	1	14	06:00	UTC	7	983.4	99	0.2	19	-0.3	8	970.2	99	-0.4	970.3	100	0.3	22	-1.2	-1.2
2019	1	14	07:00	UTC	7	984.1	99	0.1	20	-0.6	8	970.5	99	-0.6	970.6	100	0.4	23	-1.7	-1.7
2019	1	14	08:00	UTC	7	984.8	99	0	20	-0.8	8	970.7	99	-0.8	970.8	100	0.5	23	-1.7	-1.7
2019	1	14	09:00	UTC	7	985.4	98	0	20	-0.4	8	970.9	97	-0.8	971	100	0	23	-1.4	-1.4
2019	1	14	10:00	UTC	7	985.7	96	0.2	20	-0.9	8	971.3	95	-1.2	971.4	99	0.1	24	-1.6	-1.8
2019	1	14	11:00	UTC	7	985.9	93	0.2	21	-1.7	8	971.9	91	-2	972.1	95	0.1	24	-2.4	-3
2019	1	14	12:00	UTC	3	985.9	89	0.7	21	-2.9	7	972.6	88	-2.8	972.8	91	0	25	-3.2	-4.4
2019	1	14	13:00	UTC	7	986.4	88	0	21	-3.2	8	973.4	84	-3.1	973.6	88	0	25	-3.5	-5.2
2019	1	14	14:00	UTC	8	986.7	86	0	21	-3.2	8	974.4	87	-3.4	974.5	87	0	25	-3.6	-5.4
2019	1	14	15:00	UTC	8	987	87	0	21	-3.4	8	975.1	82	-3.3	975.3	87	0	25	-3.5	-5.4
2019	1	14	16:00	UTC	8	987	89	0	21	-3.9	8	975.6	83	-3.5	975.8	88	0	25	-3.8	-5.5
2019	1	14	17:00	UTC	1	987	91	0	21	-5	3	976.4	86	-4.3	976.5	93	0	25	-5.2	-6.2
2019	1	14	18:00	UTC	0	987	93	0	20	-6.1	0	977.1	90	-5.3	977.2	96	0	25	-6.7	-7.3
2019	1	14	19:00	UTC	1	987.3	93	0	21	-6.1	0	977.7	93	-6	977.8	98	0	24	-7.3	-7.6
2019	1	14	20:00	UTC	7	987.8	91	0	21	-5.6	2	978.1	89	-6.2	978.2	96	0	24	-7.9	-8.4
2019	1	14	21:00	UTC	3	988.3	89	0	20	-5.9	2	978.6	94	-7.9	978.7	96	0	24	-8.1	-8.7
2019	1	14	22:00	UTC	0	988.7	91	0	20	-7	2	979.3	92	-12.2	979.3	98	0	24	-9.4	-9.7
2019	1	14	23:00	UTC	0	989	94	0	20	-7.9	0	979.7	94	-13	979.8	98	0	24	-8.9	-9.1
2019	1	15	00:00	UTC	3	989.4	94	0	20	-7.9	8	980.4	93	-10.3	980.4	97	0	24	-8	-8.4
2019	1	15	01:00	UTC	0	990.2	95	0	20	-9	2	980.8	94	-10.9	980.8	97	0	24	-8.7	-9.1
2019	1	15	02:00	UTC	3	990.9	95	0	20	-9.4	2	981.3	90	-13.4	981.3	96	0	24	-9.2	-9.7
2019	1	15	03:00	UTC	0	991.5	93	0	20	-9.9	0	981.7	89	-14.7	981.7	95	0	24	-10.5	-11.2
2019	1	15	04:00	UTC	5	992.2	93	0	20	-9.6	7	982.3	92	-11.2	982.2	95	0	24	-9.4	-10
2019	1	15	05:00	UTC	3	992.7	91	0	20	-8.8	8	982.6	92	-8.8	982.7	94	0	24	-9.5	-10.3
2019	1	15	06:00	UTC	5	993.2	93	0	20	-8.2	8	983.3	92	-8	983.4	96	0	24	-8.7	-9.3
2019	1	15	07:00	UTC	8	993.9	93	0	20	-7	8	984	92	-7.1	984.1	96	0	24	-7.5	-8.1
2019	1	15	08:00	UTC	7	994.7	92	0	20	-6.3	8	984.8	92	-6.3	984.9	95	0	24	-6.4	-7.2
2019	1	15	09:00	UTC	7	995.2	91	0	20	-5.5	8	985.4	90	-5.4	985.4	92	0	24	-5.7	-6.7
2019	1	15	10:00	UTC	7	995.8	90	0	20	-5.1	8	985.6	87	-5.1	985.9	92	0	24	-5.5	-6.6
2019	1	15	11:00	UTC	8	995.7	89	0	20	-4.9	8	985.8	86	-5	985.9	92	0	24	-5.4	-6.6
2019	1	15	12:00	UTC	7	996.1	88	0	20	-4.9	8	985.9	86	-4.9	986	92	0	23	-5.3	-6.4
2019	1	15	13:00	UTC	7	996.4	89	0	20	-4.9	8	986.4	87	-4.9	986.6	92	0	23	-5.2	-6.3
2019	1	15	14:00	UTC	7	996.4	90	0	20	-5	8	986.7	87	-5	986.9	92	0	23	-5.5	-6.5
2019	1	15	15:00	UTC	7	996.2	89	0	20	-5.2	8	986.9	86	-5.2	987.1	90	0	24	-5.7	-7
2019	1	15	16:00	UTC	8	996.1	88	0	20	-5.4	8	987.1	85	-5.4	987.2	90	0	24	-5.7	-7.1
2019	1	15	17:00	UTC	8	995.7	88	0	20	-5.4	7	987	85	-5.3	987.2	90	0	24	-5.6	-7
2019	1	15	18:00	UTC	8	995	89	0	20	-5.1	8	987	85	-5	987.1	89	0	24	-5.4	-6.9
2019	1	15	19:00	UTC	7	994.2	89	0.3	20	-4.9	7	987.3	85	-4.8	987.4	88	0	24	-5	-6.6
2019	1	15	20:00	UTC	8	993	85	0	20	-4.4	8	987.8	84	-4.5	987.8	86	0	24	-4.4	-6.4
2019	1	15	21:00	UTC	8	991.9	87	0	20	-4.4	8	988.2	82	-4.3	988.3	87	0	23	-4.7	-6.5
2019	1	15	22:00	UTC	7	990.3	91	0.5	19	-4.4	8	988.7	84	-4.2	988.8	88	0	23	-4.2	-5.8
2019	1	15	23:00	UTC	8	988.6	87	0	20	-3.9	8	988.9	84	-3.9	989.1	88	0	23	-4.2	-5.9
2019	1	16	00:00	UTC	8	986.5	88	0	20	-3.8	8	989.4	85	-3.7	989.5	90	0	23	-4.1	-5.5
2019	1	16	01:00	UTC	8	984	84	0	20	-3.8	8	990.2	81	-3.7	990.4	85	0	24	-4.1	-6.3
2019	1	16	02:00	UTC	8	982	85	0	20	-3.9	8	990.9	82	-3.7	990.9	88	0	23	-4.1	-5.9
2019	1	16	03:00	UTC	8	980.6	83	0	20	-3.8	8	991.4	78	-3.7	991.5	84	0	22	-4.2	-6.6
2019	1	16	04:00	UTC	8	978.7	79	0	20	-4.3	8	992.1	77	-4.2	992.2	82	0	21	-4.7	-7.3
2019	1	16	05:00	UTC	8	977.6	81	0	20	-4.6	8	992.6	78	-4.4	992.7	80	0	21	-4.7	-7.6
2019	1	16	06:00	UTC	7	977.3	78	0	20	-4.8	8	993.1	74	-4.6	993.2	77	0	21	-4.8	-8.1
2019	1	16	07:00	UTC	8	977.4	77	0	20	-4.9	8	993.8	74	-4.7	993.9	79	0	21	-5.1	-8.1
2019	1	16	08:00	UTC	8	977.5	80	0	20	-5.1	8	994.5	75	-4.9	994.7	83	0	23	-5.7	-8
2019	1	16	09:00	UTC	8	977.8	83	0	20	-6.2	8	995.3	81	-5.9	995.4	87	0	23	-6.8	-8.6
2019	1	16	10:00	UTC	3	978.1	83	0	21	-6.3	8	995.5	80	-6.3	995.7	87	0	23	-7.2	-9
2019	1	16	11:00	UTC	0	978.4	81	0	21	-6.6	0	995.6	78	-6.2	995.8	85	0	23	-7.6	-9.6
2019	1	16	12:00	UTC	0	979.1	80	0	20	-6.4	0	996.1	78	-6.3	996.2	84	0	23	-7.7	-9.8
2019	1	16	13:00	UTC	0	980	82	0	20	-7.2	0	996.4	79	-6.6	996.5	86	0	23	-8.3	-10.2
2019	1	16	14:00	UTC	0	981.1	87	0	20	-8	5	996.4	86	-8.1	996.5	92	0	22	-9.7	-10.7
2019	1	16	15:00	UTC	8	982.1	91	0	20	-8.3	7	996.3	92	-11.6	996.4	94	0	22	-9.2	-10
2019	1	16	16:00	UTC	7	984.2	89	0	20	-8.2	7	996.2	95	-9.7	996.3	96	0	22	-10.7	-11.3
2019	1	16	17:00	UTC	5	984.8	91	0	20	-8.6	7	995.7	91	-11.4	995.8	95	0	22	-9.9	-10.5
2019	1	16	18:00	UTC	7	986.1	92	0	20	-8.5	7	995	92	-10.7	995.1	94	0	22	-10.6	-11.3
2019	1	16	19:00	UTC	7	987.3	88	0	20	-7.4	8	994.2	91	-10.2	994.3	94	0	22	-9.9	-10.6
2019	1	16	20:00	UTC	7	988.6	90	0	20	-6.7	7	993.1	91	-7.7	993.2	94	0	22	-9	-9.9
2019	1	16	21:00	UTC	8	989.8	91	0.4	20	-5.9	8	992	91	-6.6	992.1	94	0	22	-7.7	-8.5
2019	1	16	22:00	UTC	8	991	94	0	21	-3	8	990.5	93	-5.5	990.7	96	0.8	23	-6.5	-7
2019	1	16	23:00	UTC	9	991.8	97	3.7	21	-2.5	8	988.7	94	-2.7	988.7	98	1.3	23	-5.1	-5.3
2019	1	17	00:00	UTC	7	992.5	96	1.6	24	-2.7	8	986.5	92	-2.5	986.6	98	1	26	-3.1	-3.4
2019	1	17	01:00	UTC	9	993	96	2	26	-2.8	8	984	93	-2.5	984.2	97	1.7	27	-3	-3.5
2019	1	17	02:00	UTC	8	993.4	97	1.9	28	-2.3	8	982.1	94	-2.1	982.2	97	2.3	29	-2.8	-3.2
2019	1	17	03:00	UTC	9	993.6	96	2.1	28	-2.7	8	980.7	93	-2.4	980.7	98	1.8	31	-2.6	-2.9
2019	1	17	04:00	UTC	8	993.8	96	0.8	28	-2.4	8	978.7	93	-2.4	979.1	96	1	32	-2.9	-3.4
2019	1	17	05:00	UTC	8	994	96	0	29	-1.9	8	977.7	93	-2	978.2	97	0	33	-2.8	-3.2
2019	1	17	06:00	UTC	8	994.5	95	0.3	28	-1.6	8	977.5	93	-1.9	977.8	97	0.6	33	-2.8	-3.2
2019	1	17	07:00	UTC	8	994.9	94	0	28	-1.7	8	977.5	92	-2.1	977.7	96	0	33	-2.9	-3.4
2019	1	17	08:00	UTC	8	995.5	94	0	28	-2.1	8	977.7	93	-2.4	977.9	95	0.8	33	-4.5	-5.2
2019	1	17	09:00	UTC	8	996	92	0.6	28	-3.4	8	978.1	90	-4.2	978.2	93	0.6	33	-4.9	-5.8
2019	1	17	10:00	UTC	8	996.2	90	0	28	-4.3	8	978.3	87	-4.6	978.5	93	0.4	33	-5.2	-6.2
2019	1	17	11:00	UTC	8	996.5	87	0	28	-4.6	8	978.5	87	-4.9	979	90	0	33	-5.6	-7
2019	1	17	12:00	UTC	8	996.6	86	0	28	-5.2	8	979.2	88	-5.5	979.6	90	0	33	-5.9	-7.3
2019	1	17	13:00	UTC	7	997	86	0	28	-5.4	7	980.1	84	-5.6	980.5	91	0	33	-6.1	-7.4
2019	1	17	14:00	UTC	8	997.5	87	0	28	-5.8	8	981.1	86	-5.9	981.3	92	0	33	-6.5	-7.7
2019	1	17	15:00	UTC	8	998.2	85	0	28	-6.1	8	982	84	-6.3	982.2	87	0	33	-6.9	-8.6
2019	1	17	16:00	UTC	8	999	83	0	28	-6.5	8	984.2	81	-6.6	984.4	86	0	33	-7.1	-9.1
2019	1	17	17:00	UTC	8	999.7	84	0	28	-7.1	8	984.8	81	-7.2	985	87	0	33	-7.8	-9.5
2019	1	17	18:00	UTC	9	1000.1	89	0.4	27	-7.6	8	986.1	87	-7.7	986.3	91	1.1	32	-8.1	-9.3
2019	1	17	19:00	UTC	7	1000.9	86	0	29	-7.9	8	987.2	84	-7.8	987.4	88	0	34	-8.2	-9.8
2019	1	17	20:00	UTC	7	1001.6	84	0	29	-8.1	8	988.6	81	-7.9	988.7	87	0	34	-8.4	-10.2
2019	1	17	21:00	UTC	0	1002.4	86	0	29	-9	1	989.8	83	-8.5	989.8	87	0	34	-8.7	-10.6
2019	1	17	22:00	UTC	7	1002.9	84	0	29	-9	4	990.8	82	-8.6	990.8	87	0	34	-9.3	-11.1
2019	1	17	23:00	UTC	7	1003.4	89	0	29	-10.1	6	991.8	85	-9.7	991.8	91	0	34	-11.2	-12.3
2019	1	18	00:00	UTC	7	1004.1	89	0	29	-10.2	7	992.5	89	-10.6	992.5	93	0	34	-11.3	-12.2
2019	1	18	01:00	UTC	7	1004.6	89	0	29	-10	7	993	87	-10.1	992.9	92	0	34	-10.7	-11.8
2019	1	18	02:00	UTC	5	1004.8	88	0	29	-9.7	4	993.5	88	-10.4	993.5	93	0	33	-11.5	-12.5
2019	1	18	03:00	UTC	7	1005.2	87	0	29	-8.9	8	993.7	85	-8.9	993.7	92	0	33	-9.9	-11
2019	1	18	04:00	UTC	7	1005.1	87	0	28	-8.4	8	993.7	88	-8.6	993.7	92	0.7	33	-9.4	-10.5
2019	1	18	05:00	UTC	5	1005.1	89	0	28	-9.1	6	994.1	86	-9	994.1	93	0	33	-11.3	-12.3
2019	1	18	06:00	UTC	1	1004.8	91	0	28	-9.4	3	994.5	93	-10.8	994.6	95	0	33	-11.1	-11.8
2019	1	18	07:00	UTC	0	1004.9	91	0	28	-9.9	0	995	93	-13.7	995.1	93	0	33	-12.7	-13.6
2019	1	18	08:00	UTC	0	1005.4	89	0	28	-9.1	0	995.7	91	-13.1	995.7	94	0	33	-12.4	-13.2
2019	1	18	09:00	UTC	5	1005.7	90	0	28	-8.8	1	996.1	90	-14.1	996.2	94	0	33	-11.9	-12.7
2019	1	18	10:00	UTC	7	1005.8	88	0	28	-7.8	7	996.3	91	-12.2	996.4	94	0	33	-10.6	-11.3
2019	1	18	11:00	UTC	7	1005.7	85	0	28	-6.8	0	996.7	89	-13.4	996.7	94	0	33	-11.1	-11.9
2019	1	18	12:00	UTC	1	1005.5	85	0	28	-7.5	0	996.6	89	-12.9	996.8	94	0	32	-11.4	-12.2
2019	1	18	13:00	UTC	7	1005.3	84	0	28	-7.5	6	997.3	88	-14	997.4	92	0	32	-11.4	-12.4
2019	1	18	14:00	UTC	5	1004.6	81	0	28	-8.2	6	997.7	90	-11.9	997.8	93	0	32	-11.9	-12.9
2019	1	18	15:00	UTC	0	1003.6	87	0	27	-9.5	0	998.4	85	-16.7	998.5	92	0	32	-10.5	-11.5
2019	1	18	16:00	UTC	0	1002.4	89	0	27	-10.5	0	999.1	88	-13.1	999.2	92	0	32	-10.8	-11.9
2019	1	18	17:00	UTC	1	1001	88	0	27	-11.1	1	999.8	89	-12.2	1000	91	0	32	-13.3	-14.4
2019	1	18	18:00	UTC	0	999.2	89	0	27	-12.4	0	1000.2	89	-12.6	1000.3	90	0	32	-12.8	-14.1
2019	1	18	19:00	UTC	1	998.2	90	0	27	-12.6	6	1001	88	-13.3	1001.1	91	0	32	-12.9	-14.1
2019	1	18	20:00	UTC	3	998.7	89	0	27	-12.5	7	1001.6	89	-12	1001.7	91	0	32	-13.4	-14.5
2019	1	18	21:00	UTC	5	999.1	88	0	27	-12	7	1002.5	89	-12.1	1002.6	91	0	32	-12.8	-13.9
2019	1	18	22:00	UTC	7	999.1	88	0	27	-11.4	7	1002.9	88	-12.4	1003.1	91	0	33	-12.8	-14
2019	1	18	23:00	UTC	7	998.9	88	0	27	-12.2	4	1003.5	89	-12.2	1003.5	91	0	32	-13.4	-14.5
2019	1	19	00:00	UTC	7	998.6	89	0	27	-12.1	8	1004	89	-12.1	1004.2	91	0	32	-13.3	-14.5
2019	1	19	01:00	UTC	5	998.2	89	0	27	-12.7	1	1004.6	88	-13.3	1004.7	93	0	32	-14.3	-15.2
2019	1	19	02:00	UTC	0	998.8	88	0	27	-13.5	0	1004.9	85	-17.4	1005	92	0	32	-15.4	-16.5
2019	1	19	03:00	UTC	5	999.3	88	0	27	-12.4	6	1005.3	85	-16.9	1005.3	92	0	32	-15	-16
2019	1	19	04:00	UTC	8	1000.3	88	0	27	-11.2	8	1005.1	88	-13.3	1005.1	91	0	32	-12.9	-14
2019	1	19	05:00	UTC	8	1001.6	89	0	27	-10	8	1005.1	89	-12.1	1005	92	0	32	-11.8	-12.8
2019	1	19	06:00	UTC	7	1003.1	90	0	27	-8.2	8	1005	89	-11.6	1005	94	0	32	-10.4	-11.2
2019	1	19	07:00	UTC	7	1004.3	87	0	27	-7.6	7	1005.1	91	-10.1	1005.1	93	0	32	-10.9	-11.9
2019	1	19	08:00	UTC	7	1005.8	86	0	27	-6.8	7	1005.5	92	-7.9	1005.6	93	0	32	-10.9	-11.8
2019	1	19	09:00	UTC	7	1006.6	85	0	27	-5.5	8	1005.7	91	-6.1	1005.9	95	0	32	-9.8	-10.5
2019	1	19	10:00	UTC	1	1007.1	85	0	27	-4.5	2	1005.9	88	-4.8	1005.9	96	0	32	-7.3	-7.8
2019	1	19	11:00	UTC	0	1007.2	84	0	27	-3.4	0	1005.7	83	-3.8	1005.7	94	0	32	-5.6	-6.4
2019	1	19	12:00	UTC	1	1007.7	82	0	27	-3.1	5	1005.4	82	-3.2	1005.4	93	0	32	-5.3	-6.3
2019	1	19	13:00	UTC	7	1008.3	85	0	27	-3	8	1005.3	84	-3.2	1005.2	94	0	32	-4.7	-5.6
2019	1	19	14:00	UTC	7	1008.7	88	0	27	-3.7	7	1004.7	88	-3.5	1004.6	95	0	32	-5.3	-5.9
2019	1	19	15:00	UTC	7	1008.9	88	0	27	-2.4	7	1003.7	89	-4.1	1003.6	94	0	32	-4.2	-5.1
2019	1	19	16:00	UTC	8	1009.2	83	0	27	-0.7	8	1002.5	85	-3	1002.4	91	0	32	-2.9	-4.1
2019	1	19	17:00	UTC	7	1009.3	92	1	27	-1.1	8	1000.9	85	-1	1000.9	97	0.7	32	-2.5	-2.9
2019	1	19	18:00	UTC	9	1009.7	97	3.1	28	-1.7	8	999.2	94	-1.6	999	100	1.5	33	-1.8	-1.8
2019	1	19	19:00	UTC	7	1010	97	0.3	30	-1.4	8	998.1	91	-0.9	998.2	100	1.4	35	-2.3	-2.3
2019	1	19	20:00	UTC	7	1010.3	92	0	30	-2.4	7	998.6	88	-2.2	998.7	97	0	35	-2.9	-3.3
2019	1	19	21:00	UTC	7	1010.7	89	0	30	-2.8	7	999.1	85	-2.2	999	94	0	35	-2.8	-3.6
2019	1	19	22:00	UTC	5	1011.1	92	0	30	-3.5	7	999.1	87	-2.8	999.1	95	0	35	-3.7	-4.4
2019	1	19	23:00	UTC	5	1011.4	90	0	30	-4.8	8	998.9	87	-3.6	998.8	94	0	34	-5.7	-6.5
2019	1	20	00:00	UTC	3	1011.7	91	0	30	-4.3	1	998.7	93	-5.3	998.7	97	0	34	-6.6	-7.1
2019	1	20	01:00	UTC	3	1011.9	89	0	30	-4.5	2	998.3	94	-7.1	998.5	99	0	34	-7.4	-7.5
2019	1	20	02:00	UTC	5	1012	93	0	30	-5.1	7	998.8	95	-5.2	998.9	97	0	34	-5.7	-6
2019	1	20	03:00	UTC	7	1012.2	90	0	29	-4.4	7	999.3	89	-4.5	999.5	95	0	34	-4.8	-5.5
2019	1	20	04:00	UTC	8	1012.4	90	0	29	-3.9	8	1000.3	88	-3.9	1000.4	93	0	34	-4.2	-5.1
2019	1	20	05:00	UTC	7	1012.7	85	0	30	-4.7	7	1001.6	86	-4.8	1001.9	89	0	35	-5.9	-7.3
2019	1	20	06:00	UTC	8	1012.9	85	0	30	-5.7	8	1003.1	84	-5.7	1003.3	89	0	35	-6.1	-7.6
2019	1	20	07:00	UTC	7	1013.5	84	0	29	-6.4	8	1004.4	81	-7	1004.8	86	0	35	-7.6	-9.6
2019	1	20	08:00	UTC	3	1014.5	80	0	29	-8.6	6	1005.8	78	-8.8	1006	84	0	35	-9.6	-11.8
2019	1	20	09:00	UTC	0	1015	79	0	29	-9.2	0	1006.6	78	-9.5	1006.6	83	0	35	-10.1	-12.3
2019	1	20	10:00	UTC	0	1015.4	80	0	29	-8.7	0	1007.1	78	-9.2	1007.2	83	0	34	-9.4	-11.7
2019	1	20	11:00	UTC	1	1015.7	78	0	29	-8.1	0	1007.3	79	-8.7	1007.3	83	0	34	-8.7	-11
2019	1	20	12:00	UTC	1	1016.3	78	0	29	-7.8	4	1007.7	77	-8.1	1007.9	82	0	34	-8.4	-10.9
2019	1	20	13:00	UTC	3	1016.8	80	0	29	-8.2	1	1008.2	78	-8.4	1008.3	84	0	34	-8.7	-11
2019	1	20	14:00	UTC	0	1017	85	0	29	-9.7	0	1008.7	83	-9.1	1008.8	90	0	34	-11	-12.4
2019	1	20	15:00	UTC	0	1017.3	88	0	29	-10.2	1	1008.9	89	-10.5	1009	95	0	34	-11.5	-12.2
2019	1	20	16:00	UTC	3	1017.6	89	0	29	-10.1	5	1009.2	89	-10.6	1009.3	89	0	34	-10.4	-11.9
2019	1	20	17:00	UTC	0	1017.9	91	0	29	-11.3	0	1009.5	94	-12.6	1009.6	95	0	34	-13.2	-13.8
2019	1	20	18:00	UTC	0	1018.1	91	0	29	-12.5	0	1009.7	89	-17	1009.8	94	0	34	-13.6	-14.5
2019	1	20	19:00	UTC	0	1018.2	90	0	29	-12.4	0	1010	89	-12.5	1010.1	92	0	34	-13.2	-14.3
2019	1	20	20:00	UTC	0	1018.4	89	0	29	-13.5	0	1010.3	88	-12.8	1010.5	91	0	33	-14.4	-15.5
2019	1	20	21:00	UTC	0	1018.6	89	0	28	-14.2	0	1010.7	88	-13.2	1010.9	91	0	33	-14.7	-15.8
2019	1	20	22:00	UTC	0	1018.6	90	0	28	-13.7	0	1011.1	88	-13.5	1011.2	90	0	33	-15.1	-16.4
2019	1	20	23:00	UTC	0	1018.4	88	0	28	-13.7	0	1011.5	88	-13.4	1011.6	90	0	34	-15.1	-16.4
2019	1	21	00:00	UTC	0	1018.3	89	0	28	-14.4	0	1011.7	89	-13.9	1011.8	90	0	34	-15	-16.2
2019	1	21	01:00	UTC	0	1018.3	89	0	28	-14.5	0	1012	88	-14.4	1012.2	90	0	34	-15.3	-16.6
2019	1	21	02:00	UTC	0	1018	89	0	28	-14.6	0	1012.1	88	-14.3	1012.3	89	0	34	-15.9	-17.3
2019	1	21	03:00	UTC	0	1017.9	89	0	28	-14.7	0	1012.3	86	-17.2	1012.5	89	0	34	-16.2	-17.5
2019	1	21	04:00	UTC	0	1017.7	89	0	28	-14.8	0	1012.6	83	-19.9	1012.7	89	0	34	-16.4	-17.8
2019	1	21	05:00	UTC	0	1017.4	87	0	28	-15.2	0	1012.9	84	-20.9	1013	87	0	33	-16.8	-18.4
2019	1	21	06:00	UTC	0	1016.8	87	0	28	-15	0	1013.1	82	-22.2	1013.2	89	0	33	-15.9	-17.3
2019	1	21	07:00	UTC	0	1016.7	85	0	28	-15.4	0	1013.6	84	-19.5	1013.8	88	0	33	-17.1	-18.6
2019	1	21	08:00	UTC	0	1016.8	86	0	28	-16	0	1014.6	85	-17	1014.7	87	0	33	-17	-18.6
2019	1	21	09:00	UTC	0	1016.7	83	0	28	-14.7	0	1015.1	85	-16.8	1015.3	87	0	33	-17.4	-19
2019	1	21	10:00	UTC	0	1016.6	82	0	28	-14.3	0	1015.6	85	-15.7	1015.8	88	0	33	-16	-17.5
2019	1	21	11:00	UTC	0	1016.2	81	0	28	-14.2	0	1015.9	85	-15.4	1016.1	88	0	33	-15.6	-17.1
2019	1	21	12:00	UTC	0	1015.8	80	0	28	-14.1	0	1016.4	85	-15	1016.6	88	0	33	-15.2	-16.7
2019	1	21	13:00	UTC	0	1015.4	80	0	28	-14.1	2	1016.9	85	-15	1017	88	0	33	-15.4	-16.9
2019	1	21	14:00	UTC	0	1015.3	82	0	28	-15.1	0	1017	85	-16.4	1017.3	88	0	33	-16.2	-17.7
2019	1	21	15:00	UTC	0	1014.9	83	0	28	-15.8	0	1017.4	85	-17.3	1017.4	88	0	33	-16.7	-18.2
2019	1	21	16:00	UTC	0	1014.6	87	0	28	-17.4	0	1017.8	85	-17.8	1018	87	0	33	-17.1	-18.7
2019	1	21	17:00	UTC	0	1014.3	86	0	28	-16.4	0	1018.1	84	-18.4	1018.2	87	0	33	-18.4	-20
2019	1	21	18:00	UTC	0	1014.2	85	0	28	-17.3	0	1018.3	83	-19.6	1018.4	86	0	33	-19.3	-21
2019	1	21	19:00	UTC	0	1014	85	0	28	-18.6	0	1018.3	82	-21.3	1018.5	84	0	33	-21.1	-23
2019	1	21	20:00	UTC	0	1013.4	85	0	28	-19	0	1018.5	82	-21.4	1018.7	86	0	33	-20.2	-21.9
2019	1	21	21:00	UTC	0	1012.9	85	0	28	-19.2	0	1018.8	81	-22.8	1019	84	0	33	-21.8	-23.8
2019	1	21	22:00	UTC	0	1012.6	85	0	28	-19.8	0	1018.7	80	-23.3	1018.9	83	0	33	-22.2	-24.3
2019	1	21	23:00	UTC	0	1012.1	86	0	28	-19.9	0	1018.6	80	-23.6	1018.7	81	0	33	-23.2	-25.5
2019	1	22	00:00	UTC	0	1011.6	84	0	28	-20.4	0	1018.5	80	-24.3	1018.7	82	0	33	-23.8	-26
2019	1	22	01:00	UTC	0	1011	84	0	28	-20.4	0	1018.5	79	-24.4	1018.6	82	0	33	-24.1	-26.3
2019	1	22	02:00	UTC	0	1010.5	83	0	28	-21.1	0	1018.2	79	-24.9	1018.4	82	0	33	-24.5	-26.7
2019	1	22	03:00	UTC	0	1010	83	0	27	-20.6	0	1018.1	79	-24.7
2019	1	22	04:00	UTC	0	1009.6	85	0	28	-21.3	0	1017.9	79	-25	1018.1	80	0	33	-25.9	-28.3
2019	1	22	05:00	UTC	5	1009.3	83	0	28	-20.8	5	1017.4	78	-25.3	1017.4	81	0	33	-25	-27.4
2019	1	22	06:00	UTC	3	1009.1	82	0	27	-18.8	4	1017	79	-24	1017.1	80	0	33	-25.4	-27.7
2019	1	22	07:00	UTC	5	1009	83	0	27	-19.2	1	1017	79	-24	1017.1	82	0	33	-23.8	-26
2019	1	22	08:00	UTC	0	1008.9	88	0	28	-18.2	0	1017	80	-22.9	1017.1	82	0	33	-23.7	-26
2019	1	22	09:00	UTC	5	1008.8	83	0	27	-16.3	7	1016.8	82	-20.6	1016.9	84	0	33	-20.4	-22.4
2019	1	22	10:00	UTC	7	1008.6	84	0	27	-13.7	4	1016.9	84	-18	1017	84	0	33	-19.9	-21.8
2019	1	22	11:00	UTC	1	1008.3	78	0	27	-13.9	4	1016.3	85	-16.1	1016.4	87	0	32	-15	-16.8
2019	1	22	12:00	UTC	3	1008.2	81	0	27	-13.6	0	1015.9	86	-15.1	1015.9	88	0	33	-14.9	-16.4
2019	1	22	13:00	UTC	5	1008.2	81	0	28	-12.8	7	1015.5	86	-15.5	1015.6	89	0	33	-14.8	-16.2
2019	1	22	14:00	UTC	0	1008.2	86	0	27	-13.3	4	1015.5	84	-17.1	1015.4	91	0	33	-13.3	-14.5
2019	1	22	15:00	UTC	5	1008.2	88	0	28	-13.1	2	1015	85	-17.8	1014.8	92	0	32	-13.4	-14.4
2019	1	22	16:00	UTC	3	1008.1	89	0	27	-13.1	6	1014.8	85	-16.7	1014.9	90	0	33	-14.2	-15.6
2019	1	22	17:00	UTC	5	1008.5	90	0	27	-12.4	6	1014.5	84	-18	1014.7	90	0	33	-14.4	-15.6
2019	1	22	18:00	UTC	7	1009.5	86	0	28	-12.8	7	1014.4	85	-17	1014.4	90	0	33	-14	-15.3
2019	1	22	19:00	UTC	7	1009.6	88	0	28	-11.7	7	1014.1	86	-15.7	1014.2	91	0	33	-13.8	-15
2019	1	22	20:00	UTC	5	1010.2	88	0	27	-9.1	7	1013.6	86	-15.2	1013.6	90	0	33	-13.8	-15.1
2019	1	22	21:00	UTC	5	1010.8	89	0	27	-8.7	5	1013.1	84	-16.8	1013.2	93	0	32	-12.9	-13.9
2019	1	22	22:00	UTC	7	1011.3	93	0	27	-6.9	7	1012.8	85	-16.3	1012.7	94	0	32	-11.5	-12.3
2019	1	22	23:00	UTC	7	1011.9	93	0	27	-4.5	8	1012.3	92	-9.1	1012.3	97	0	33	-7.8	-8.2
2019	1	23	00:00	UTC	7	1012.6	96	0	27	-4.2	8	1011.7	95	-4.7	1011.7	98	0	33	-6.4	-6.6
2019	1	23	01:00	UTC	7	1013.3	92	0	27	-3.6	8	1011.1	96	-4.3	1011.1	97	0	33	-7.4	-7.8
2019	1	23	02:00	UTC	7	1014.3	94	0	27	-3.6	8	1010.5	96	-3.9	1010.5	98	0	33	-4.7	-5
2019	1	23	03:00	UTC	7	1015	94	0.4	28	-3.4	8	1010.1	96	-3.8	1010	98	0	32	-4.2	-4.4
2019	1	23	04:00	UTC	9	1015.8	94	0.6	28	-2.8	8	1009.6	96	-3	1009.6	99	0	33	-3.6	-3.8
2019	1	23	05:00	UTC	7	1016.6	95	0.2	28	-2.7	8	1009.3	95	-2.6	1009.2	99	0.8	34	-3.2	-3.3
2019	1	23	06:00	UTC	7	1017.4	95	0.6	29	-2.7	8	1009.1	92	-2.7	1009	99	0.6	33	-3.1	-3.3
2019	1	23	07:00	UTC	7	1018.5	97	2.3	30	-2.3	8	1009	95	-2.4	1009	99	0.8	37	-2.9	-3
2019	1	23	08:00	UTC	7	1019.3	96	0.3	31	-2.1	8	1009	95	-2.2	1008.9	100	1.3	39	-2.7	-2.7
2019	1	23	09:00	UTC	7	1019.8	95	0	31	-1.7	8	1008.8	92	-1.7	1008.8	100	0	40	-2.4	-2.4
2019	1	23	10:00	UTC	7	1020.4	95	0	31	-1.5	8	1008.6	92	-1.4	1008.5	100	0	40	-2.1	-2.1
2019	1	23	11:00	UTC	7	1020.7	96	0	31	-1.1	8	1008.3	93	-1.1	1008.3	100	0	40	-1.7	-1.7
2019	1	23	12:00	UTC	7	1021.1	96	0	31	-0.7	8	1008.3	93	-0.7	1008.2	100	0	39	-1	-1
2019	1	23	13:00	UTC	7	1021.2	95	0	31	-0.5	8	1008.2	93	-0.4	1008.1	100	0	39	-0.9	-0.9
2019	1	23	14:00	UTC	7	1021.3	95	0	31	-0.5	8	1008.2	92	-0.2	1008.1	100	0	39	-0.9	-0.9
2019	1	23	15:00	UTC	7	1021.6	97	1.9	31	-0.5	8	1008.3	94	-0.3	1008.2	100	0	39	-0.8	-0.8
2019	1	23	16:00	UTC	7	1021.8	97	0	31	-0.4	7	1008.1	96	-0.5	1008.3	100	0	40	-0.9	-0.9
2019	1	23	17:00	UTC	7	1022.1	93	0	31	-1.2	7	1008.5	89	-1	1008.6	98	0	40	-1.8	-2
2019	1	23	18:00	UTC	7	1022	94	0	31	-1.5	7	1009.5	92	-1.4	1009.6	100	0	40	-2.1	-2.2
2019	1	23	19:00	UTC	7	1022.1	95	0	31	-2.3	7	1009.7	92	-2.1	1009.7	99	0	40	-2.6	-2.7
2019	1	23	20:00	UTC	7	1022.4	95	0	31	-2.6	7	1010.3	94	-2.5	1010.3	99	0	40	-2.7	-2.8
2019	1	23	21:00	UTC	7	1022.2	96	0	30	-2.5	8	1010.8	94	-2.2	1010.9	99	0	40	-2.6	-2.8
2019	1	23	22:00	UTC	7	1022.1	96	0	30	-2.5	8	1011.4	94	-2.3	1011.4	99	0	40	-3	-3.1
2019	1	23	23:00	UTC	7	1022.3	95	0	30	-2.8	7	1012	93	-2.5	1012.1	99	0	40	-3.1	-3.3
2019	1	24	00:00	UTC	7	1021.9	96	0	30	-3.4	8	1012.7	94	-2.5	1012.8	98	0	40	-2.7	-3
2019	1	24	01:00	UTC	7	1021.8	90	0	30	-2.6	8	1013.5	88	-3.3	1013.8	93	0	40	-3.9	-4.9
2019	1	24	02:00	UTC	8	1021.3	88	0	30	-4	8	1014.5	89	-4.5	1014.7	92	0	40	-5.6	-6.6
2019	1	24	03:00	UTC	8	1021.2	88	0	30	-5.2	8	1015.2	89	-5.8	1015.4	93	0	40	-6.6	-7.5
2019	1	24	04:00	UTC	5	1021.2	86	0	30	-6.5	7	1016	88	-7.1	1016.3	94	0	40	-8.1	-9
2019	1	24	05:00	UTC	3	1021.2	80	0	30	-7.8	1	1016.8	81	-8.4	1016.9	87	0	40	-9.1	-10.9
2019	1	24	06:00	UTC	7	1021	77	0	30	-9.1	8	1017.6	77	-9.5	1017.8	86	0	40	-10.2	-12.1
2019	1	24	07:00	UTC	7	1021.1	80	0	30	-9.7	3	1018.7	81	-10.9	1018.8	86	0	40	-11.9	-13.8
2019	1	24	08:00	UTC	0	1021.2	78	0	30	-10.5	0	1019.5	80	-12.1	1019.7	87	0	40	-12.8	-14.5
2019	1	24	09:00	UTC	0	1021.1	78	0	30	-10.3	0	1020	78	-11.4	1020.2	86	0	40	-12.9	-14.8
2019	1	24	10:00	UTC	3	1020.9	76	0	30	-10.2	2	1020.6	78	-10.9	1020.8	85	0	39	-12.6	-14.6
2019	1	24	11:00	UTC	1	1020.7	76	0	30	-10	0	1020.8	77	-10.6	1020.9	83	0	39	-12.1	-14.5
2019	1	24	12:00	UTC	7	1020.3	82	0	30	-10.3	2	1021.3	83	-11	1021.4	87	0	39	-12.5	-14.3
2019	1	24	13:00	UTC	5	1019.7	85	0	30	-10.5	8	1021.4	84	-10.9	1021.6	89	0	39	-12.8	-14.3
2019	1	24	14:00	UTC	5	1019.4	86	0	30	-10.8	3	1021.6	87	-12	1021.6	89	0	39	-13.3	-14.6
2019	1	24	15:00	UTC	7	1019.2	87	0	30	-11.1	7	1021.8	86	-12.4	1021.9	90	0	39	-13.5	-14.8
2019	1	24	16:00	UTC	7	1018.5	88	0	30	-11.3	7	1022	87	-12.1	1022.2	90	0	39	-13.1	-14.3
2019	1	24	17:00	UTC	7	1017.9	89	0	30	-11.3	7	1022.3	88	-11.7	1022.4	92	0	39	-12.7	-13.7
2019	1	24	18:00	UTC	7	1017.2	90	0	30	-10.8	7	1022.2	89	-11.2	1022.2	92	0	39	-12.4	-13.5
2019	1	24	19:00	UTC	8	1016.5	90	0	30	-10.3	7	1022.3	89	-10.7	1022.4	92	0	38	-12.1	-13.1
2019	1	24	20:00	UTC	8	1015.8	89	0	30	-9.8	8	1022.5	89	-10.5	1022.5	93	0	38	-11.6	-12.5
2019	1	24	21:00	UTC	8	1015.1	89	0	30	-8.9	8	1022.3	88	-9.6	1022.4	93	0	38	-10.7	-11.7
2019	1	24	22:00	UTC	8	1014.3	84	0	30	-6.4	8	1022.4	87	-9	1022.4	93	0	38	-10.5	-11.5
2019	1	24	23:00	UTC	8	1013.4	77	0	30	-4.7	8	1022.5	88	-8.5	1022.5	93	0	38	-9.6	-10.6
2019	1	25	00:00	UTC	8	1012.3	79	0	30	-4.6	8	1022.1	91	-7.8	1022.1	93	0	38	-9	-9.9
2019	1	25	01:00	UTC	8	1011.5	88	0	29	-4.5	8	1021.8	84	-4.8	1021.9	93	0	38	-8.6	-9.4
2019	1	25	02:00	UTC	7	1010.6	91	0	29	-4	8	1021.4	89	-4.5	1021.6	94	0	38	-8	-8.7
2019	1	25	03:00	UTC	8	1009.7	94	0	29	-3.4	8	1021.3	91	-4.1	1021.3	96	0	38	-6.4	-6.9
2019	1	25	04:00	UTC	7	1008.7	94	0	29	-3.2	8	1021.2	92	-3.7	1021.2	97	0	38	-4.5	-4.8
2019	1	25	05:00	UTC	8	1008	95	0	29	-3.2	8	1021.2	93	-3.1	1020.9	99	0	37	-3.5	-3.6
2019	1	25	06:00	UTC	7	1007.4	95	0	29	-3.2	8	1021.1	95	-3.4	1021.1	100	0	37	-3.7	-3.7
2019	1	25	07:00	UTC	7	1006.9	93	0	28	-3.2	8	1021.2	93	-3.3	1021.2	99	0	37	-3.8	-3.9
2019	1	25	08:00	UTC	7	1006.6	92	0	28	-2.9	8	1021.2	92	-3.1	1021.2	98	0	37	-3.5	-3.8
2019	1	25	09:00	UTC	7	1006.2	92	0	28	-2.7	8	1021.2	91	-2.8	1021.2	96	0	37	-3.2	-3.8
2019	1	25	10:00	UTC	7	1005.8	93	0	28	-2.7	8	1020.9	91	-2.7	1020.9	96	0	37	-3	-3.6
2019	1	25	11:00	UTC	7	1005.4	93	0	29	-3.2	8	1020.7	92	-3.3	1020.6	97	0	37	-3.1	-3.5
2019	1	25	12:00	UTC	7	1005.1	93	0	29	-3.4	8	1020.4	93	-3.5	1020.3	97	0	37	-3.7	-4.1
2019	1	25	13:00	UTC	8	1004.9	91	0	29	-3.8	8	1019.8	90	-3.9	1019.8	98	0	37	-3.9	-4.2
2019	1	25	14:00	UTC	8	1004.8	91	0	30	-4.1	8	1019.5	89	-4.4	1019.4	95	0	37	-4.4	-5.1
2019	1	25	15:00	UTC	8	1004.9	87	0	30	-4.3	8	1019.3	89	-4.7	1019.2	93	0	37	-4.9	-5.9
2019	1	25	16:00	UTC	7	1004.9	85	0	30	-5.1	7	1018.6	85	-5.2	1018.6	93	0	37	-5.5	-6.5
2019	1	25	17:00	UTC	7	1004.8	85	0	30	-5.2	7	1018	85	-5.5	1018	92	0	37	-6	-7.1
2019	1	25	18:00	UTC	7	1004.6	85	0	30	-5.2	7	1017.3	84	-5.4	1017.4	91	0	37	-6	-7.2
2019	1	25	19:00	UTC	7	1004.4	83	0	29	-5.3	8	1016.6	84	-5.4	1016.6	90	0	37	-5.9	-7.3
2019	1	25	20:00	UTC	8	1004.3	83	0	29	-5.2	8	1015.9	82	-5.3	1016	90	0	37	-6	-7.3
2019	1	25	21:00	UTC	8	1004.4	83	0	29	-5.3	8	1015.2	81	-5.6	1015.3	89	0	37	-6.1	-7.7
2019	1	25	22:00	UTC	7	1004.6	89	0	29	-6	8	1014.5	85	-6.3	1014.6	90	0	38	-6.7	-8
2019	1	25	23:00	UTC	8	1004.7	89	0.2	30	-6.5	8	1013.6	88	-6.8	1013.6	92	0	37	-7.2	-8.2
2019	1	26	00:00	UTC	8	1004.7	89	0.4	30	-6.4	8	1012.5	88	-6.8	1012.6	93	0	37	-7.4	-8.3
2019	1	26	01:00	UTC	8	1004.6	89	0.3	30	-6.5	8	1011.7	88	-6.8	1011.8	91	0.6	37	-7.4	-8.6
2019	1	26	02:00	UTC	8	1004.6	90	0.2	30	-6.8	8	1010.8	89	-7.2	1010.9	92	0.1	38	-7.7	-8.8
2019	1	26	03:00	UTC	7	1004.7	90	0.4	31	-7.5	8	1009.8	88	-7.4	1009.9	92	0	37	-7.8	-8.8
2019	1	26	04:00	UTC	8	1004.9	88	0	31	-7.3	8	1008.9	90	-7.6	1009	92	0.5	36	-8.1	-9.1
2019	1	26	05:00	UTC	8	1004.9	88	0	31	-7.2	8	1008.2	89	-7.5	1008.3	93	0	37	-8.4	-9.4
2019	1	26	06:00	UTC	8	1004.8	90	0.3	31	-7.4	8	1007.6	89	-7.8	1007.7	91	0.2	38	-9.2	-10.3
2019	1	26	07:00	UTC	7	1005.1	89	0	30	-7.8	8	1007.2	87	-8.7	1007.4	90	0.5	38	-9.7	-11
2019	1	26	08:00	UTC	8	1005.2	89	0	32	-8.5	8	1006.8	87	-8.9	1007.1	90	0	39	-10.1	-11.4
2019	1	26	09:00	UTC	8	1005.4	87	0.3	30	-8.9	8	1006.4	86	-9.3	1006.6	89	0	39	-9.9	-11.3
2019	1	26	10:00	UTC	9	1005.7	88	0.3	34	-8.9	8	1005.9	86	-8.9	1006.1	89	0	39	-9.4	-10.9
2019	1	26	11:00	UTC	8	1005.7	87	0	34	-8.4	8	1005.5	85	-8.6	1005.8	88	0	39	-9.1	-10.7
2019	1	26	12:00	UTC	9	1005.8	87	0.2	36	-8.5	8	1005.2	85	-8.6	1005.4	89	0	40	-9.2	-10.8
2019	1	26	13:00	UTC	8	1005.9	87	0.3	36	-8.6	8	1005	86	-8.7	1005.3	89	0.8	40	-9.4	-10.9
2019	1	26	14:00	UTC	8	1006.2	86	0	37	-9.1	8	1005	85	-9.5	1005.2	89	0.2	40	-10.2	-11.7
2019	1	26	15:00	UTC	7	1006.5	86	0	37	-10.1	4	1005	86	-10.3	1005.3	90	0	40	-11.3	-12.6
2019	1	26	16:00	UTC	7	1006.8	85	0	37	-10.2	7	1005	85	-10.6	1005.3	90	0	40	-11.2	-12.5
2019	1	26	17:00	UTC	9	1007.1	86	0	37	-10.1	8	1004.9	85	-10.3	1005.2	90	0	41	-10.6	-11.9
2019	1	26	18:00	UTC	8	1007.4	86	0.3	37	-10.1	8	1004.8	86	-10.2	1004.9	91	0.5	40	-10.6	-11.8
2019	1	26	19:00	UTC	8	1007.8	87	0	37	-10.2	8	1004.6	86	-10.4	1004.8	90	0	40	-10.7	-12
2019	1	26	20:00	UTC	8	1007.9	86	0	37	-10.3	8	1004.5	87	-10.5	1004.7	90	0	40	-10.8	-12.1
2019	1	26	21:00	UTC	8	1008.1	87	0	37	-10.4	8	1004.5	86	-10.7	1004.7	90	0	40	-11	-12.3
2019	1	26	22:00	UTC	8	1008.1	87	0	37	-10.6	8	1004.7	86	-10.9	1004.9	89	0	40	-11.2	-12.6
2019	1	26	23:00	UTC	8	1008.4	86	0	37	-10.8	8	1004.8	87	-11.2	1005	90	0	40	-11.8	-13
2019	1	27	00:00	UTC	7	1008.3	88	0	37	-11.5	6	1004.8	88	-12.1	1005	91	0	40	-12.7	-13.8
2019	1	27	01:00	UTC	1	1008.2	88	0	36	-12.6	3	1004.7	89	-14.8	1004.9	91	0	40	-13.2	-14.4
2019	1	27	02:00	UTC	0	1008	89	0	36	-13.1	0	1004.7	85	-16.7	1004.9	92	0	40	-14.2	-15.2
2019	1	27	03:00	UTC	0	1007.7	88	0	36	-13.5	0	1004.8	86	-18	1004.9	91	0	40	-14.4	-15.5
2019	1	27	04:00	UTC	0	1007.3	87	0	36	-14.2	0	1005.1	86	-19.7	1005.1	91	0	40	-15.4	-16.6
2019	1	27	05:00	UTC	0	1006.5	88	0	36	-14.4	0	1005.1	85	-19.6	1005.2	92	0	40	-17.6	-18.6
2019	1	27	06:00	UTC	0	1006.3	85	0	36	-15.1	0	1005	84	-21.2	1005.2	89	0	40	-18	-19.4
2019	1	27	07:00	UTC	0	1006.3	86	0	36	-15.3	0	1005.3	83	-21.2	1005.4	89	0	40	-17.6	-18.9
2019	1	27	08:00	UTC	0	1006	84	0	36	-15	0	1005.4	82	-21.4	1005.6	88	0	40	-16.7	-18.2
2019	1	27	09:00	UTC	0	1005.3	83	0	36	-14.8	0	1005.5	85	-17	1005.7	86	0	40	-16.8	-18.5
2019	1	27	10:00	UTC	0	1004.9	82	0	35	-14.1	0	1005.8	86	-15	1006	88	0	40	-15.7	-17.3
2019	1	27	11:00	UTC	0	1003.8	78	0	35	-12.8	0	1005.8	86	-14	1006	86	0	40	-15.4	-17.1
2019	1	27	12:00	UTC	0	1003.2	80	0	35	-12.8	0	1005.9	86	-13.3	1006.1	86	0	40	-14.9	-16.8
2019	1	27	13:00	UTC	0	1002.5	78	0	35	-12.9	0	1006	83	-13.2	1006.2	82	0	39	-13.9	-16.3
2019	1	27	14:00	UTC	0	1002	79	0	35	-13.3	0	1006.4	84	-14.9	1006.6	87	0	39	-15.4	-17.1
2019	1	27	15:00	UTC	0	1001.8	83	0	35	-14.7	0	1006.6	89	-18.5
2019	1	27	16:00	UTC	0	1001.5	85	0	35	-14.8	0	1007.1	86	-20.7	1007.2	92	0	39	-18.1	-19.1
2019	1	27	17:00	UTC	0	1001.2	85	0	35	-15.7	0	1007.2	87	-19.8	1007.5	89	0	39	-18.6	-20
2019	1	27	18:00	UTC	0	1000.8	86	0	35	-16.2	0	1007.5	86	-20.5	1007.8	88	0	39	-19.3	-20.8
2019	1	27	19:00	UTC	0	1000.6	85	0	35	-16.3	0	1008	84	-22.1	1008	88	0	39	-18.7	-20.2
2019	1	27	20:00	UTC	7	1000.5	84	0	35	-15.6	4	1008.1	85	-20.9	1008.4	84	0	39	-20.7	-22.6
2019	1	27	21:00	UTC	7	1000.4	85	0	35	-15.5	8	1008.3	85	-16.6	1008.6	87	0	40	-19	-20.6
2019	1	27	22:00	UTC	3	1000.3	87	0	35	-15.6	6	1008.3	85	-16.4	1008.6	87	0	40	-17.7	-19.3
2019	1	27	23:00	UTC	3	1000.2	88	0	35	-15.2	7	1008.5	86	-16.6	1008.8	87	0	39	-18.7	-20.3
2019	1	28	00:00	UTC	7	1000	88	0	35	-14.3	7	1008.5	86	-15.3	1008.7	88	0	39	-17.9	-19.4
2019	1	28	01:00	UTC	7	999.9	88	0	34	-14.3	7	1008.5	87	-14.1	1008.6	89	0	39	-15.7	-17.1
2019	1	28	02:00	UTC	7	999.7	89	0	34	-13.3	7	1008.2	88	-13.2	1008.4	90	0	39	-15.1	-16.4
2019	1	28	03:00	UTC	7	999.8	90	0	34	-12.2	7	1007.9	88	-12.6	1008	90	0	39	-14.4	-15.7
2019	1	28	04:00	UTC	7	999.7	89	0	34	-11.6	7	1007.6	88	-12.3	1007.7	91	0	39	-14.1	-15.3
2019	1	28	05:00	UTC	7	999.8	81	0	34	-7.7	7	1006.8	89	-11.1	1007	92	0	39	-12.8	-13.8
2019	1	28	06:00	UTC	7	999.7	83	0	34	-7	7	1006.4	85	-7.6	1006.8	92	0	39	-12.2	-13.2
2019	1	28	07:00	UTC	7	999.8	82	0	34	-6.5	7	1006.3	81	-6.6	1006.7	93	0	39	-10.7	-11.6
2019	1	28	08:00	UTC	7	1000	83	0	34	-6.5	7	1006.1	82	-6.8	1006.1	91	0	40	-7.5	-8.7
2019	1	28	09:00	UTC	7	999.8	82	0	33	-6.4	7	1005.2	81	-6.7	1005.7	87	0	39	-7.2	-9.1
2019	1	28	10:00	UTC	7	999.7	82	0	33	-5.9	8	1004.7	81	-6.5	1005.1	85	0	40	-7.2	-9.3
2019	1	28	11:00	UTC	7	999.5	84	0	33	-6	8	1003.7	85	-6.2	1003.9	88	0.5	40	-6.8	-8.4
2019	1	28	12:00	UTC	7	999.1	84	0	33	-5.6	7	1003.1	85	-6	1003.4	89	0	40	-6.5	-8
2019	1	28	13:00	UTC	7	998.8	87	0.4	33	-5.7	8	1002.2	85	-5.7	1002.5	90	0.4	40	-6.3	-7.7
2019	1	28	14:00	UTC	7	998.6	91	1.6	34	-5.9	8	1001.7	89	-5.9	1001.8	93	1	42	-6.3	-7.2
2019	1	28	15:00	UTC	7	998.4	91	1.9	35	-6	8	1001.6	89	-6	1001.7	93	1.2	43	-6.3	-7.3
2019	1	28	16:00	UTC	7	998.2	91	1.5	37	-5.9	8	1001.4	89	-6	1001.5	93	1.6	44	-6.4	-7.4
2019	1	28	17:00	UTC	7	998	91	1.1	38	-5.9	8	1001.1	89	-5.7	1001.2	93	1	45	-6.4	-7.3
2019	1	28	18:00	UTC	9	997.8	92	1.2	38	-5.9	8	1000.8	90	-5.6	1000.8	94	0.5	46	-6	-6.8
2019	1	28	19:00	UTC	9	997.7	93	1	39	-5.9	8	1000.6	90	-5.7	1000.6	94	0.5	46	-5.9	-6.7
2019	1	28	20:00	UTC	7	997.9	93	0.5	40	-5.7	8	1000.6	90	-5.6	1000.6	94	0.8	47	-5.8	-6.6
2019	1	28	21:00	UTC	7	998.1	91	0	41	-5.4	8	1000.4	90	-5.5	1000.5	94	0	48	-5.9	-6.7
2019	1	28	22:00	UTC	7	998.2	91	0	42	-5.2	8	1000.3	88	-5.2	1000.3	92	0	48	-5.6	-6.6
2019	1	28	23:00	UTC	7	998.1	92	0.5	42	-5.2	8	1000.3	88	-5.2	1000.2	93	0	48	-5.5	-6.5
2019	1	29	00:00	UTC	7	998.3	92	0	43	-5.3	8	1000	89	-5.3	1000.1	94	0.3	48	-5.7	-6.5
2019	1	29	01:00	UTC	8	998.4	92	0	43	-5.3	8	1000.1	89	-5.2	1000	94	0	48	-5.5	-6.4
2019	1	29	02:00	UTC	8	998.6	89	0	44	-5.1	8	999.8	87	-5.1	999.8	93	0	49	-5.6	-6.5
2019	1	29	03:00	UTC	8	998.9	88	0	43	-5.2	8	999.8	87	-5.1	999.9	93	0	50	-5.6	-6.6
2019	1	29	04:00	UTC	7	999.2	88	0	43	-5.1	8	999.8	86	-5.1	999.9	92	0	50	-5.5	-6.6
2019	1	29	05:00	UTC	8	999.5	89	0	43	-5.1	8	999.8	88	-5.1	999.9	93	0	48	-5.5	-6.4
2019	1	29	06:00	UTC	8	1000	89	0	43	-5.1	8	999.7	88	-5.3	999.8	94	0	49	-5.8	-6.6
2019	1	29	07:00	UTC	7	1000.6	89	0	43	-5.2	8	999.9	88	-5.4	999.9	93	0	49	-5.9	-6.8
2019	1	29	08:00	UTC	8	1001.3	89	0	43	-5.1	8	1000	88	-5.5	1000.2	94	0	49	-6	-6.8
2019	1	29	09:00	UTC	8	1002.1	91	0.2	44	-5.1	8	999.8	89	-5.2	1000	93	0	50	-5.8	-6.7
2019	1	29	10:00	UTC	7	1003	91	0	44	-4.6	8	999.8	90	-4.7	999.9	93	0.3	50	-5.2	-6.1
2019	1	29	11:00	UTC	8	1003.5	92	0.8	44	-4.4	8	999.6	90	-4.7	999.5	93	0.7	50	-4.9	-5.9
2019	1	29	12:00	UTC	7	1004	90	0.3	44	-4.5	8	999.2	90	-4.6	999.3	93	0.5	50	-5	-5.9
2019	1	29	13:00	UTC	7	1004.5	92	0.8	44	-4.6	8	998.8	90	-4.7	998.9	94	0.6	51	-5	-5.9
2019	1	29	14:00	UTC	7	1005.1	92	0.2	45	-4.6	8	998.7	90	-4.6	998.8	94	0	51	-5.1	-6
2019	1	29	15:00	UTC	7	1005.6	93	0	45	-4.2	8	998.6	91	-4.3	998.7	95	0.2	52	-4.9	-5.6
2019	1	29	16:00	UTC	7	1006.2	93	1	46	-4.4	8	998.2	91	-4.3	998.3	95	0.6	52	-4.9	-5.6
2019	1	29	17:00	UTC	7	1006.7	93	0.2	46	-4.7	8	998.1	92	-4.6	998.1	96	0	52	-5	-5.6
2019	1	29	18:00	UTC	9	1007.1	94	3	47	-4.9	8	997.9	93	-4.9	998	97	1	53	-5.2	-5.6
2019	1	29	19:00	UTC	8	1007.5	93	0.3	46	-4.8	8	997.8	93	-4.9	997.9	96	0	54	-5.7	-6.2
2019	1	29	20:00	UTC	8	1007.9	88	0	46	-4.4	8	998	92	-4.9	998.1	97	0	53	-5.8	-6.2
2019	1	29	21:00	UTC	8	1008.3	90	0.4	47	-4.3	8	998.2	92	-4.9	998.3	97	0.4	53	-5.9	-6.2
2019	1	29	22:00	UTC	7	1008.7	92	0	47	-4.3	8	998.3	91	-4.7	998.3	98	0	52	-5.5	-5.8
2019	1	29	23:00	UTC	8	1008.9	94	0.2	47	-3.9	8	998.3	91	-4.3	998.4	97	0	54	-5.4	-5.8
2019	1	30	00:00	UTC	7	1009.3	92	0.4	47	-3.4	8	998.4	93	-3.9	998.5	98	0.3	53	-5.3	-5.6
2019	1	30	01:00	UTC	8	1009.5	90	0.3	47	-3.5	8	998.5	95	-4.5	998.5	98	0	54	-5.4	-5.7
2019	1	30	02:00	UTC	8	1009.7	90	0.4	47	-3.3	8	998.7	95	-4.4	998.7	99	0	54	-5.8	-6
2019	1	30	03:00	UTC	8	1009.9	89	0	47	-3	8	999	95	-4.8	999	99	0	54	-5.7	-5.7
2019	1	30	04:00	UTC	9	1010.4	95	0.5	47	-3.1	8	999.3	96	-4.3	999.3	99	0	54	-4.6	-4.7
2019	1	30	05:00	UTC	8	1010.8	96	0.2	48	-3	8	999.6	96	-3.4	999.6	99	0	54	-3.8	-4
2019	1	30	06:00	UTC	8	1011.2	96	0.2	49	-2.3	8	1000.1	96	-3.4	1000.1	99	0.3	55	-3.4	-3.5
2019	1	30	07:00	UTC	7	1011.7	96	0.5	49	-1.8	8	1000.7	96	-2.3	1000.7	99	0.1	55	-3.3	-3.4
2019	1	30	08:00	UTC	8	1012.4	95	0	49	-1.2	8	1001.5	96	-2.3	1001.6	99	0	55	-3	-3.1
2019	1	30	09:00	UTC	8	1012.8	96	0.4	48	-0.9	8	1002.2	95	-1.6	1002.3	98	0	55	-3.4	-3.7
2019	1	30	10:00	UTC	8	1013.2	95	0	49	-0.7	8	1003	95	-1.6	1003.1	96	0	55	-2.8	-3.3
2019	1	30	11:00	UTC	8	1013.6	95	0	49	-0.3	8	1003.5	94	-1	1003.6	95	0	55	-2.1	-2.8
2019	1	30	12:00	UTC	8	1014	96	0	49	0	8	1004	95	-1	1004.1	96	0	55	-1.9	-2.5
2019	1	30	13:00	UTC	8	1014.4	97	0	49	0.3	8	1004.5	95	0.4	1004.5	99	0	55	-0.7	-0.9
2019	1	30	14:00	UTC	7	1014.7	95	0.3	48	0.3	8	1005	92	0.6	1005	99	0	55	0	-0.1
2019	1	30	15:00	UTC	7	1014.9	93	0	48	0.3	8	1005.7	91	0.4	1005.7	96	0	54	0.1	-0.5
2019	1	30	16:00	UTC	7	1015.2	90	0	48	0.2	8	1006.3	89	0.3	1006.3	96	0	54	-0.1	-0.7
2019	1	30	17:00	UTC	8	1015.6	86	0	48	0	8	1006.7	84	0.1	1006.6	96	0	54	-0.4	-1
2019	1	30	18:00	UTC	8	1016	85	0	48	-0.2	8	1007.2	86	-0.3	1007.2	94	0	54	-0.8	-1.7
2019	1	30	19:00	UTC	8	1016	86	0	47	-0.2	8	1007.6	86	-0.3	1007.5	96	0	54	-1	-1.6
2019	1	30	20:00	UTC	8	1016.3	90	0	47	-0.5	8	1007.9	88	-0.4	1008	96	0	54	-1	-1.5
2019	1	30	21:00	UTC	7	1016.7	91	0	47	-0.6	8	1008.5	90	-0.6	1008.5	97	0	54	-1.1	-1.6
2019	1	30	22:00	UTC	8	1016.9	90	0	48	-0.5	8	1008.8	91	-0.7	1008.9	98	0	54	-1.3	-1.6
2019	1	30	23:00	UTC	8	1017.2	92	0	48	-0.5	8	1009	95	-1.2	1009	97	0	53	-1.4	-1.7
2019	1	31	00:00	UTC	8	1017.4	93	0	47	-0.8	8	1009.3	96	-1.2	1009.4	100	0	53	-1.8	-1.8
2019	1	31	01:00	UTC	8	1017.3	96	0	47	-0.7	8	1009.6	96	-1.3	1009.7	100	0	53	-2.1	-2.1
2019	1	31	02:00	UTC	7	1017.5	97	0.3	47	-0.6	8	1009.8	96	-1.2	1009.8	100	0	53	-1.7	-1.7
2019	1	31	03:00	UTC	7	1017.6	98	0	47	-0.4	8	1010	97	-0.9	1010.1	100	0	53	-1.6	-1.6
2019	1	31	04:00	UTC	7	1017.5	98	0	47	-0.5	8	1010.4	98	-0.4	1010.5	100	0	53	-1	-1
2019	1	31	05:00	UTC	7	1017.4	97	0	47	-0.6	8	1010.8	96	-0.5	1010.9	100	0	53	-1.2	-1.2
2019	1	31	06:00	UTC	8	1017.4	95	0	47	-0.6	8	1011.2	97	-1.1	1011.3	100	0	53	-1.8	-1.8
2019	1	31	07:00	UTC	8	1017.4	96	0	47	-0.9	8	1011.8	98	-1.7	1012	100	0	53	-1.5	-1.5
2019	1	31	08:00	UTC	8	1017.2	93	0	47	-0.5	8	1012.4	95	-1.1	1012.5	99	0	53	-1.7	-1.7
2019	1	31	09:00	UTC	7	1017.3	88	0	46	-0.1	7	1013	93	-0.9	1013.1	99	0	53	-1.8	-2
2019	1	31	10:00	UTC	1	1017.3	89	0	46	-0.2	0	1013.3	90	-1.3	1013.4	92	0	53	-1.3	-2.4
2019	1	31	11:00	UTC	7	1016.9	84	0	46	0.3	0	1013.6	90	-1	1013.6	90	0	53	-0.7	-2.1
2019	1	31	12:00	UTC	5	1016.7	82	0	46	0.5	7	1014.1	90	-0.9	1014.1	93	0	53	-1.1	-2.1
2019	1	31	13:00	UTC	7	1016.6	90	0	46	-0.4	7	1014.5	90	-0.9	1014.7	96	0	53	-2	-2.6
2019	1	31	14:00	UTC	7	1016.4	94	0	46	-1	8	1014.8	92	-1.2	1015	97	0	53	-1.8	-2.3
2019	1	31	15:00	UTC	5	1016.3	93	0	46	-1.4	6	1015	94	-2	1015.2	99	0	53	-2.2	-2.3
2019	1	31	16:00	UTC	0	1016.2	96	0	46	-3.1	5	1015.3	98	-2.6	1015.5	100	0	52	-2.7	-2.7
2019	1	31	17:00	UTC	8	1015.9	98	0	46	-2.6	9	1015.8	98	-2.6	1015.8	100	0	52	-3	-3
2019	1	31	18:00	UTC	9	1015.9	98	0	46	-2.7	8	1016	99	-2.2	1016.2	100	0	52	-2.8	-2.8
2019	1	31	19:00	UTC	8	1016	98	0	46	-2	8	1016.2	99	-1.8	1016.3	100	0	52	-2.4	-2.4
2019	1	31	20:00	UTC	8	1016.1	99	0	46	-1.8	9	1016.5	99	-1.7	1016.6	100	0	52	-2.5	-2.5
2019	1	31	21:00	UTC	7	1016	99	0	46	-1.7	8	1016.8	98	-1.6	1016.9	100	0	52	-2.5	-2.5
2019	1	31	22:00	UTC	8	1015.8	98	0	46	-1.8	8	1017	90	-1.4	1017.3	100	0	52	-2.3	-2.3
2019	1	31	23:00	UTC	8	1015.5	89	0	46	-1.6	8	1017.4	89	-1.7	1017.5	99	0	52	-2.2	-2.3
2019	2	1	00:00	UTC	7	1015.3	91	0	46	-2.3	8	1017.5	88	-2.4	1017.6	93	0	52	-2.5	-3.5
2019	2	1	01:00	UTC	8	1015.1	90	0	46	-3	8	1017.4	90	-3.1	1017.4	95	0	52	-3.2	-3.9
2019	2	1	02:00	UTC	8	1015.2	94	0	46	-4.1	8	1017.5	92	-3.6	1017.6	96	0	52	-3.9	-4.5
2019	2	1	03:00	UTC	7	1015	92	0	46	-4.4	8	1017.5	90	-4.2	1017.6	96	0	52	-4.3	-4.8
2019	2	1	04:00	UTC	8	1014.9	96	0	46	-5.8	8	1017.7	95	-5.7	1017.6	96	0	52	-4.9	-5.4
2019	2	1	05:00	UTC	7	1014.8	95	0	46	-5	8	1017.7	93	-4.9	1017.8	96	0	52	-5.1	-5.6
2019	2	1	06:00	UTC	8	1014.8	91	0	45	-4.6	8	1017.6	90	-4.7	1017.6	95	0	52	-4.8	-5.4
2019	2	1	07:00	UTC	8	1015.3	91	0	45	-4.5	8	1017.6	91	-4.8	1017.7	95	0	52	-5	-5.6
2019	2	1	08:00	UTC	7	1015.2	89	0	45	-4	8	1017.4	90	-4.3	1017.6	95	0	52	-4.7	-5.4
2019	2	1	09:00	UTC	7	1015.6	88	0	45	-3.7	8	1017.4	88	-3.7	1017.7	93	0	52	-4.2	-5.2
2019	2	1	10:00	UTC	7	1015.6	86	0	45	-3.1	8	1017.4	86	-3.1	1017.6	91	0	52	-3.6	-4.8
2019	2	1	11:00	UTC	7	1015.4	83	0	45	-2.5	8	1017.1	85	-2.8	1017.3	89	0	52	-3.2	-4.7
2019	2	1	12:00	UTC	7	1014.8	81	0	45	-2.5	8	1016.8	83	-2.6	1017	88	0	52	-3.2	-4.9
2019	2	1	13:00	UTC	8	1014.5	81	0	45	-2.7	8	1016.8	82	-2.8	1016.9	87	0	51	-3.4	-5.4
2019	2	1	14:00	UTC	8	1014.8	83	0	45	-3.1	8	1016.7	82	-3.3	1016.8	88	0	51	-3.9	-5.7
2019	2	1	15:00	UTC	8	1014.4	86	0	45	-3.4	8	1016.5	85	-3.5	1016.8	91	0	51	-4	-5.3
2019	2	1	16:00	UTC	8	1014.4	87	0	45	-3.4	8	1016.5	87	-3.5	1016.7	93	0	51	-4.2	-5.2
2019	2	1	17:00	UTC	8	1014	89	0	45	-3.8	8	1016.2	89	-3.9	1016.3	95	0	51	-4.5	-5.2
2019	2	1	18:00	UTC	8	1013.9	91	0	45	-4.2	8	1016.1	91	-4.4	1016.3	97	0	51	-5.1	-5.6
2019	2	1	19:00	UTC	8	1013.5	94	0	45	-4.6	8	1016.2	93	-4.8	1016.3	98	0	51	-5.9	-6.2
2019	2	1	20:00	UTC	8	1012.8	93	0.7	45	-4.7	8	1016.4	93	-4.9	1016.6	98	0	51	-6.2	-6.4
2019	2	1	21:00	UTC	7	1012.6	93	0.3	45	-4.6	8	1016.1	91	-4.7	1016.3	98	0.4	51	-6.1	-6.4
2019	2	1	22:00	UTC	7	1012	91	0	45	-4.2	8	1016	90	-4.3	1016.2	98	0.4	51	-5.7	-6
2019	2	1	23:00	UTC	7	1011.5	89	0.4	44	-4.2	8	1015.7	88	-4.2	1015.9	95	0	51	-5.3	-5.9
2019	2	2	00:00	UTC	7	1011.3	91	0	45	-4.3	8	1015.5	89	-4.3	1015.7	95	0	51	-5.2	-5.9
2019	2	2	01:00	UTC	7	1010.2	92	0	45	-3.9	8	1015.3	91	-4.1	1015.5	96	0	51	-5.3	-5.8
2019	2	2	02:00	UTC	7	1009.5	93	0	45	-3.6	8	1015.5	92	-3.8	1015.7	97	0	51	-5.6	-6.1
2019	2	2	03:00	UTC	7	1009	94	0	45	-3.2	8	1015.3	93	-3.5	1015.5	98	0	51	-5.3	-5.6
2019	2	2	04:00	UTC	7	1007.9	94	0	45	-3	8	1015.2	93	-3.2	1015.4	99	0	51	-4.1	-4.2
2019	2	2	05:00	UTC	7	1007.3	94	0	45	-2.8	8	1015	94	-3	1015.2	99	0	51	-3.7	-3.9
2019	2	2	06:00	UTC	7	1006.7	95	0	45	-3	8	1015.1	94	-3	1015.3	99	0	51	-3.5	-3.7
2019	2	2	07:00	UTC	7	1006.5	94	0	45	-2.8	8	1015.5	93	-2.9	1015.5	98	0	51	-3.4	-3.7
2019	2	2	08:00	UTC	7	1006.5	93	0	45	-2.5	8	1015.4	90	-2.6	1015.6	96	0	51	-3.2	-3.8
2019	2	2	09:00	UTC	7	1006.2	94	0	45	-2.6	8	1015.7	92	-2.6	1015.8	95	0	51	-3	-3.7
2019	2	2	10:00	UTC	7	1005.7	95	0.4	45	-2.3	8	1015.6	93	-2.5	1015.9	97	0	51	-2.9	-3.3
2019	2	2	11:00	UTC	7	1005.6	95	0.2	45	-2.2	8	1015.7	93	-2.4	1015.9	98	0.5	51	-2.9	-3.2
2019	2	2	12:00	UTC	7	1005.3	94	0	45	-2.3	8	1015.1	91	-2.4	1015.1	95	0	51	-3	-3.6
2019	2	2	13:00	UTC	7	1004.9	92	0	45	-2.4	8	1014.7	90	-2.5	1014.9	94	0	51	-2.9	-3.8
2019	2	2	14:00	UTC	7	1004.9	92	0	45	-2.6	8	1014.9	90	-2.5	1015	94	0	50	-2.9	-3.7
2019	2	2	15:00	UTC	7	1005.2	92	0	45	-2.7	8	1014.5	90	-2.6	1014.6	95	0	50	-3	-3.7
2019	2	2	16:00	UTC	7	1005.7	93	0	45	-2.7	8	1014.5	92	-2.6	1014.7	96	0	50	-3	-3.6
2019	2	2	17:00	UTC	7	1006.2	94	0	45	-2.5	8	1014.2	92	-2.5	1014.4	96	0	50	-3	-3.5
2019	2	2	18:00	UTC	7	1006.8	96	0	45	-2.5	8	1014.2	94	-2.5	1014.3	99	0	50	-3	-3.1
2019	2	2	19:00	UTC	7	1007.8	96	0	44	-2.5	8	1013.8	94	-2.6	1013.9	99	0	50	-3	-3.2
2019	2	2	20:00	UTC	7	1008.4	95	0	44	-2.5	8	1013.1	94	-2.7	1013.1	99	0	50	-3	-3.2
2019	2	2	21:00	UTC	7	1009	95	0	44	-2.6	8	1012.7	94	-2.6	1012.8	98	0	50	-3	-3.2
2019	2	2	22:00	UTC	7	1009.8	94	0	44	-2.8	8	1012.3	92	-2.7	1012.3	97	0	50	-3	-3.4
2019	2	2	23:00	UTC	7	1010.8	93	0	44	-2.7	8	1011.7	91	-2.6	1011.8	97	0.5	50	-3	-3.5
2019	2	3	00:00	UTC	7	1011.1	93	0.7	44	-2.8	8	1011.4	91	-2.6	1011.6	97	0.9	50	-2.9	-3.4
2019	2	3	01:00	UTC	7	1011.6	94	1	45	-3	8	1010.5	92	-2.7	1010.5	97	1.4	50	-3	-3.4
2019	2	3	02:00	UTC	7	1012.4	94	0.4	46	-3.1	8	1009.6	92	-2.7	1009.6	97	1.2	50	-3	-3.5
2019	2	3	03:00	UTC	7	1012.7	92	0.2	47	-3.3	8	1009	90	-2.8	1009.1	96	1.1	50	-2.9	-3.5
2019	2	3	04:00	UTC	8	1012.7	92	0.3	49	-3.1	8	1008	89	-2.8	1007.8	95	0.7	50	-3	-3.7
2019	2	3	05:00	UTC	8	1013.2	94	0.8	50	-2.9	8	1007.4	92	-2.7	1007.4	96	0.7	50	-3.3	-3.7
2019	2	3	06:00	UTC	8	1014	93	1.1	51	-2.3	8	1006.6	92	-2.4	1006.8	97	1	50	-3.1	-3.6
2019	2	3	07:00	UTC	8	1014.4	94	2	51	-1.9	8	1006.9	92	-2.2	1006.8	97	2.3	50	-2.8	-3.1
2019	2	3	08:00	UTC	8	1014.7	95	0	51	-1.2	8	1006.7	93	-1.6	1006.7	97	0.7	50	-2.3	-2.7
2019	2	3	09:00	UTC	8	1015.2	96	0.9	51	-0.5	8	1006.2	93	-0.8	1006.4	97	0.2	50	-1.7	-2.1
2019	2	3	10:00	UTC	8	1015.4	96	0	51	0	8	1005.9	94	-0.4	1005.9	97	0.7	50	-1.2	-1.6
2019	2	3	11:00	UTC	8	1015.3	98	0	51	0.2	8	1005.6	96	0	1005.8	100	0.9	50	-0.3	-0.4
2019	2	3	12:00	UTC	8	1015.3	99	0.2	51	0.5	8	1005.3	97	0.4	1005.3	100	0.7	50	0.1	0.1
2019	2	3	13:00	UTC	8	1015.9	99	0.7	51	1	8	1004.8	97	0.9	1004.9	100	1.2	50	0.4	0.4
2019	2	3	14:00	UTC	8	1016.5	99	0.8	51	1.4	8	1004.9	98	1.4	1004.9	100	1.2	49	0.9	0.9
2019	2	3	15:00	UTC	8	1017.3	99	0.5	50	1.5	8	1005.2	97	1.9	1005.2	100	0	49	1.8	1.8
2019	2	3	16:00	UTC	8	1017.5	94	0	50	1.5	8	1005.7	92	1.9	1005.5	97	0	49	1.7	1.2
2019	2	3	17:00	UTC	8	1018	95	0.2	50	1.1	8	1006.2	93	1.5	1006.1	97	0	49	1.1	0.6
2019	2	3	18:00	UTC	7	1018.5	94	0	50	0.9	8	1006.8	94	0.9	1006.6	99	0	48	0.6	0.5
2019	2	3	19:00	UTC	8	1019	88	0	49	0.7	8	1007.6	87	0.8	1007.4	94	0	48	0.5	-0.4
2019	2	3	20:00	UTC	8	1019.2	87	0	49	0.2	8	1008.5	86	0.4	1008.3	91	0	48	-0.1	-1.3
2019	2	3	21:00	UTC	8	1019.4	86	0	49	-0.5	8	1009	85	-0.4	1008.8	93	0	48	-0.5	-1.5
2019	2	3	22:00	UTC	8	1019.3	85	0	49	-0.7	8	1009.9	83	-0.6	1009.6	92	0	48	-0.8	-1.9
2019	2	3	23:00	UTC	8	1019.1	85	0	49	-0.9	8	1010.8	84	-0.8	1010.6	90	0	47	-1.1	-2.5
2019	2	4	00:00	UTC	8	1018.8	85	0	49	-1	8	1011.1	83	-1	1011	90	0	47	-1.4	-2.9
2019	2	4	01:00	UTC	8	1018.4	85	0	49	-1.2	8	1011.6	83	-1.2	1011.6	89	0	47	-1.7	-3.4
2019	2	4	02:00	UTC	8	1018	84	0	48	-1.5	8	1012.4	82	-1.3	1012.3	90	0	47	-1.9	-3.2
2019	2	4	03:00	UTC	8	1017.3	81	0	48	-1.9	8	1012.6	80	-1.7	1012.6	86	0	47	-2.4	-4.4
2019	2	4	04:00	UTC	8	1016.7	82	0	48	-2.1	8	1012.8	79	-2.1	1012.9	84	0	47	-2.8	-5.1
2019	2	4	05:00	UTC	8	1016.2	78	0	48	-2.6	8	1013.2	78	-2.4	1013.2	80	0	47	-3.2	-6.2
2019	2	4	06:00	UTC	8	1016	79	0	48	-3	8	1014.1	78	-3	1014.1	82	0	47	-3.6	-6.3
2019	2	4	07:00	UTC	8	1015.9	78	0	48	-3.3	8	1014.4	78	-3.4	1014.5	82	0	47	-3.9	-6.6
2019	2	4	08:00	UTC	8	1016.1	79	0	48	-3.7	8	1014.8	79	-3.6	1014.8	86	0	47	-4.3	-6.3
2019	2	4	09:00	UTC	7	1016	80	0	48	-4.1	8	1015.2	79	-4	1015.2	91	0	47	-4.8	-6
2019	2	4	10:00	UTC	7	1016	76	0	48	-4.1	4	1015.4	72	-4.2	1015.4	75	0	46	-4.8	-8.4
2019	2	4	11:00	UTC	8	1016.1	75	0	48	-3.9	8	1015.3	73	-4.2	1015.4	80	0	46	-4.8	-7.8
2019	2	4	12:00	UTC	8	1015.9	78	0	48	-4.1	8	1015.3	70	-4.2	1015.4	84	0	46	-5	-7.3
2019	2	4	13:00	UTC	8	1015.8	75	0	48	-4.4	7	1015.9	71	-4.6	1016	80	0	46	-5.1	-8
2019	2	4	14:00	UTC	8	1015.4	76	0	47	-4.9	8	1016.5	75	-4.9	1016.6	81	0	46	-5.6	-8.3
2019	2	4	15:00	UTC	5	1015.4	75	0	47	-5.7	7	1017.3	74	-5.6	1017.3	80	0	46	-6.2	-9.1
2019	2	4	16:00	UTC	7	1015.2	78	0	47	-5.9	8	1017.4	77	-5.7	1017.5	80	0	46	-6.4	-9.2
2019	2	4	17:00	UTC	7	1014.8	81	0	47	-6.3	7	1018.1	77	-6.1	1018.2	84	0	46	-6.7	-9
2019	2	4	18:00	UTC	7	1014.5	83	0	47	-6.3	8	1018.6	80	-6.1	1018.6	85	0	46	-6.6	-8.7
2019	2	4	19:00	UTC	8	1014.1	85	0	47	-6	8	1019	83	-5.9	1018.9	88	0	46	-6.4	-8.1
2019	2	4	20:00	UTC	8	1013.7	86	0	47	-5.5	8	1019.4	84	-5.6	1019.3	90	0	46	-6	-7.4
2019	2	4	21:00	UTC	8	1013.6	87	0	47	-4.8	8	1019.5	85	-4.8	1019.4	92	0	46	-5.5	-6.6
2019	2	4	22:00	UTC	8	1013.5	88	0	47	-3.9	8	1019.4	86	-4	1019.4	92	0	46	-4.8	-5.9
2019	2	4	23:00	UTC	7	1013.2	88	0	47	-3.2	8	1019	86	-3.2	1019	92	0	46	-3.7	-4.8
2019	2	5	00:00	UTC	7	1012.9	88	0	47	-1.5	8	1018.9	88	-2.7	1018.8	92	0	46	-3.2	-4.3
2019	2	5	01:00	UTC	8	1012.6	92	0	47	-0.8	8	1018.4	91	-0.7	1018.4	97	0	46	-2.2	-2.7
2019	2	5	02:00	UTC	8	1012.3	92	0	47	-0.5	8	1018	90	-0.4	1018	98	0	46	-1.3	-1.5
2019	2	5	03:00	UTC	8	1012	96	0.3	47	-0.3	8	1017.2	95	-0.4	1017.1	100	1	46	-0.9	-0.9
2019	2	5	04:00	UTC	8	1011.9	96	0.5	47	-0.1	8	1016.7	95	-0.1	1016.5	99	0.3	46	-0.5	-0.6
2019	2	5	05:00	UTC	8	1011.9	98	1.3	48	0	8	1016.1	96	0	1016	100	1.3	47	-0.2	-0.2
2019	2	5	06:00	UTC	8	1012.5	99	0.2	49	0.2	8	1015.9	96	0.4	1015.7	100	0.7	46	0.3	0.3
2019	2	5	07:00	UTC	7	1013.5	97	0	49	0.4	8	1015.7	95	0.5	1015.6	100	0.1	48	0.3	0.3
2019	2	5	08:00	UTC	8	1014.8	93	0.4	49	0.7	8	1015.9	90	1	1015.9	99	0.2	49	0.4	0.3
2019	2	5	09:00	UTC	7	1015.7	95	0.5	49	0.6	8	1015.6	93	0.8	1015.7	98	0	48	0.3	0.1
2019	2	5	10:00	UTC	8	1016.5	92	0	49	0.7	8	1015.9	91	0.8	1015.8	98	0.5	48	0.3	0
2019	2	5	11:00	UTC	8	1017	95	0.7	49	0.1	8	1015.9	93	0.4	1015.8	97	0	47	0	-0.4
2019	2	5	12:00	UTC	8	1017.8	96	0.4	48	-0.3	8	1015.8	94	-0.1	1015.6	98	0.4	47	-0.3	-0.6
2019	2	5	13:00	UTC	8	1018.4	94	0.3	49	-0.3	8	1015.6	92	-0.1	1015.5	98	0.2	49	-0.4	-0.7
2019	2	5	14:00	UTC	8	1018.9	96	0.5	49	-0.5	8	1015.4	95	-0.3	1015.3	98	0.8	49	-0.7	-0.9
2019	2	5	15:00	UTC	8	1019.4	98	0.8	50	-0.7	8	1015.2	95	-0.5	1015.2	98	0.7	50	-0.7	-1.1
2019	2	5	16:00	UTC	8	1019.6	96	0.5	50	-0.9	8	1015.1	93	-0.6	1015	97	1	50	-1	-1.4
2019	2	5	17:00	UTC	8	1019.4	98	0.5	51	-1	8	1014.6	95	-0.8	1014.6	98	0.5	51	-1.1	-1.4
2019	2	5	18:00	UTC	8	1019.5	97	0.2	52	-1	8	1014.3	93	-0.6	1014.3	98	0.2	52	-1.1	-1.4
2019	2	5	19:00	UTC	7	1019.3	97	0.3	53	-0.9	8	1014.1	93	-0.6	1013.8	98	0	52	-1	-1.2
2019	2	5	20:00	UTC	7	1019.2	97	0.3	53	-0.7	8	1013.7	94	-0.4	1013.6	98	0	53	-0.7	-1.1
2019	2	5	21:00	UTC	7	1018.5	96	0	53	-0.7	8	1013.6	93	-0.3	1013.6	98	0	53	-0.7	-1
2019	2	5	22:00	UTC	7	1018.2	96	0.3	53	-0.8	8	1013.5	93	-0.6	1013.3	97	0	53	-0.7	-1.2
2019	2	5	23:00	UTC	8	1017.8	96	0	53	-1	8	1013.3	92	-0.7	1013.2	96	0	53	-0.9	-1.4
2019	2	6	00:00	UTC	8	1017	95	0.3	53	-1	8	1012.9	93	-0.8	1012.9	96	0	54	-1.1	-1.6
2019	2	6	01:00	UTC	7	1016.3	96	0.3	54	-1.3	8	1012.6	95	-1.2	1012.6	98	0.2	54	-1.4	-1.7
2019	2	6	02:00	UTC	8	1015.4	96	0.5	53	-1.4	8	1012.4	94	-1.3	1012.4	99	0.7	54	-1.6	-1.8
2019	2	6	03:00	UTC	8	1014.1	97	0.5	55	-1.4	8	1012.1	96	-1.4	1012.1	99	0	54	-1.7	-1.8
2019	2	6	04:00	UTC	9	1012.8	97	0.4	56	-1.5	8	1012	96	-1.3	1012	100	0.5	55	-1.9	-1.9
2019	2	6	05:00	UTC	8	1011.3	98	0.2	56	-1.5	8	1012	96	-1.4	1012	100	0.5	55	-1.9	-1.9
2019	2	6	06:00	UTC	8	1010	97	0.8	56	-1.3	8	1012.5	96	-1.2	1012.9	94	0.2	57	-2.7	-3.5
2019	2	6	07:00	UTC	7	1009.2	92	0	56	-3	8	1013.5	86	-3.8	1014	91	0	57	-4.2	-5.5
2019	2	6	08:00	UTC	3	1008.9	89	0	55	-5.7	3	1014.8	86	-6.3	1015.2	91	0	57	-7	-8.3
2019	2	6	09:00	UTC	0	1008.7	84	0	56	-6.7	4	1015.9	85	-7.6	1016.1	89	0	57	-8.2	-9.7
2019	2	6	10:00	UTC	0	1008.1	86	0	56	-7.2	1	1016.5	83	-7.8	1016.8	90	0	57	-8.4	-9.7
2019	2	6	11:00	UTC	0	1007.9	82	0	56	-6.5	0	1017.1	82	-7.4	1017.4	87	0	57	-7.4	-9.2
2019	2	6	12:00	UTC	0	1008.2	81	0	57	-6.1	0	1017.9	80	-6.8	1018	83	0	57	-7	-9.3
2019	2	6	13:00	UTC	0	1008.3	79	0	57	-6	0	1018.5	77	-6.6	1018.6	83	0	57	-7.1	-9.4
2019	2	6	14:00	UTC	0	1008.9	81	0	57	-6.5	0	1019	79	-6.6	1019.1	86	0	56	-8.4	-10.4
2019	2	6	15:00	UTC	0	1009.4	84	0	56	-8	0	1019.4	83	-7.6	1019.6	90	0	56	-9.6	-10.9
2019	2	6	16:00	UTC	3	1009.8	93	0	56	-7.9	3	1019.7	90	-8	1019.6	95	0	56	-8.2	-8.9
2019	2	6	17:00	UTC	8	1009.9	95	0	56	-7.1	8	1019.5	94	-7.5	1019.4	99	0	56	-7.4	-7.5
2019	2	6	18:00	UTC	8	1009.9	96	0	56	-6.2	8	1019.5	96	-6.5	1019.4	99	0	56	-6.7	-6.8
2019	2	6	19:00	UTC	8	1010	96	0	56	-6.4	8	1019.4	94	-6.1	1019.4	98	0	56	-6.6	-6.9
2019	2	6	20:00	UTC	7	1010.4	96	0	56	-5.4	8	1019.2	96	-5.9	1019.2	99	0	55	-6	-6.1
2019	2	6	21:00	UTC	8	1010.5	95	0	56	-3.3	8	1018.7	94	-5.4	1018.8	98	0	55	-5.7	-5.9
2019	2	6	22:00	UTC	7	1010.4	92	0	56	-2.7	8	1018.4	94	-2.9	1018.4	99	0	55	-4.2	-4.3
2019	2	6	23:00	UTC	7	1009.8	94	0	56	-2.2	8	1017.9	91	-2.2	1017.8	99	0	55	-3.2	-3.4
2019	2	7	00:00	UTC	7	1009.3	93	0	55	-2.3	8	1016.9	93	-2.3	1016.8	98	0	55	-2.8	-3
2019	2	7	01:00	UTC	7	1008.4	91	0	55	-2.9	8	1016.2	90	-2.6	1016	96	0	55	-2.9	-3.4
2019	2	7	02:00	UTC	7	1007.6	92	0	55	-2.5	8	1015.4	90	-2.6	1015.2	94	0	55	-2.9	-3.8
2019	2	7	03:00	UTC	7	1006.2	91	0	55	-2.3	7	1014.1	90	-2.5	1014	95	0	55	-2.9	-3.6
2019	2	7	04:00	UTC	7	1005.9	95	0.5	55	-2	8	1012.8	92	-2.2	1012.7	96	0	55	-2.5	-3.1
2019	2	7	05:00	UTC	7	1004.9	96	1.6	58	-2	8	1011.3	94	-2.1	1011.1	98	1	56	-2.3	-2.5
2019	2	7	06:00	UTC	7	1004.5	97	1	59	-1.4	8	1010.1	94	-1.5	1010	99	0.8	58	-1.8	-2
2019	2	7	07:00	UTC	7	1004.2	97	0	59	-1.1	8	1009.2	95	-1.1	1009.2	98	0	58	-1.2	-1.4
2019	2	7	08:00	UTC	7	1004	96	0.8	58	-0.8	8	1008.9	95	-0.8	1008.8	98	0.7	58	-1.1	-1.3
2019	2	7	09:00	UTC	7	1003.7	97	0.5	59	-0.5	8	1008.6	95	-0.4	1008.4	98	0	59	-0.7	-1
2019	2	7	10:00	UTC	7	1003.6	98	0	59	0.1	8	1008.1	96	0.3	1008	99	0	59	0.2	0.1
2019	2	7	11:00	UTC	7	1002.8	98	0	59	0.6	8	1008	97	0.8	1007.8		0	58	0.4	0.4
2019	2	7	12:00	UTC	7	1002.1	99	1.1	59	1	8	1008.3	97	1.2
2019	2	7	13:00	UTC	7	1001.5	96	0	58	1.3	8	1008.3	94	1.3	1008.2	100	0	58	0.8	0.8
2019	2	7	14:00	UTC	7	1001.2	95	0	58	1.3	8	1008.9	90	1.5	1008.8	98	0	58	0.9	0.6
2019	2	7	15:00	UTC	7	1001	94	0	58	1.2	8	1009.4	91	1.4	1009.4	97	0	58	0.8	0.3
2019	2	7	16:00	UTC	7	1000.8	93	0	57	1.2	8	1009.8	91	1.3	1009.7	95	0	57	0.9	0.2
2019	2	7	17:00	UTC	7	1000.9	91	0	57	1.2	8	1009.9	91	1.2	1009.9	94	0	57	0.9	0.1
2019	2	7	18:00	UTC	7	1000.8	94	0	57	0.9	8	1010	91	1.1	1010	96	0	57	0.6	0.1
2019	2	7	19:00	UTC	7	1001	92	0	57	1.2	8	1010.1	91	1.2	1010.1	97	0	57	0.6	0.2
2019	2	7	20:00	UTC	7	1001.1	95	0	57	1	8	1010.4	93	1.1	1010.4	97	0	57	0.8	0.4
2019	2	7	21:00	UTC	7	1001.5	96	0	56	1.2	8	1010.5	96	1.2	1010.5	99	0	57	0.8	0.7
2019	2	7	22:00	UTC	7	1002.1	97	0	56	1.2	8	1010.4	97	1.1	1010.4	100	0	57	0.8	0.8
2019	2	7	23:00	UTC	7	1002.8	97	0	56	1	8	1009.8	95	1.4	1009.8	100	0	57	1	0.9
2019	2	8	00:00	UTC	7	1003.3	97	0	56	0.9	8	1009.2	96	1.1	1009.1	100	0	56	0.8	0.8
2019	2	8	01:00	UTC	7	1003.5	97	0	56	0.8	8	1008.4	95	1	1008.4	99	0	56	0.7	0.6
2019	2	8	02:00	UTC	7	1003.5	97	0	56	0.7	8	1007.4	96	0.9	1007.1	100	0	56	0.7	0.7
2019	2	8	03:00	UTC	8	1003.7	97	0	56	0.8	8	1006.3	97	0.8	1006.2	100	0	56	0.5	0.5
2019	2	8	04:00	UTC	7	1003.5	98	0	55	0.8	8	1005.8	97	0.9	1005.7	100	0.4	56	0.6	0.6
2019	2	8	05:00	UTC	7	1003	96	0	55	0.8	8	1004.8	95	0.9	1004.8	100	0	56	0.8	0.7
2019	2	8	06:00	UTC	7	1002.9	91	0	55	0.8	8	1004.6	91	1	1004.3	96	0	55	0.6	0.1
2019	2	8	07:00	UTC	7	1002.8	90	0	55	0.7	8	1004.2	88	0.9	1004.2	93	0	55	0.6	-0.4
2019	2	8	08:00	UTC	8	1002.7	89	0	55	0.9	8	1004	88	0.8	1003.8	94	0.5	55	0.2	-0.7
2019	2	8	09:00	UTC	7	1002.2	95	0	55	0.5	8	1003.7	94	0.4	1003.5	99	0.4	55	0.1	0
2019	2	8	10:00	UTC	7	1002	92	0	55	1	8	1003.3	91	0.9	1003.3	98	0	55	0.5	0.2
2019	2	8	11:00	UTC	7	1001.4	92	0	54	1	8	1002.7	92	1	1002.6	99	0	55	0.6	0.5
2019	2	8	12:00	UTC	7	1000.8	95	0	54	1.2	8	1002	94	1.2	1001.9	99	0	55	0.9	0.8
2019	2	8	13:00	UTC	7	1000.2	95	0	54	1.4	8	1001.3	93	1.6	1001.2	99	0	54	1.3	1.2
2019	2	8	14:00	UTC	7	999.8	94	0	53	1.6	8	1000.9	93	1.8	1001	98	0	54	1.5	1.2
2019	2	8	15:00	UTC	8	999.5	97	0	53	1.5	8	1000.6	95	1.7	1000.7	100	0.5	53	1.4	1.4
2019	2	8	16:00	UTC	8	998.8	96	0.8	53	2	8	1000.8	95	2	1000.6	99	0.9	53	1.7	1.5
2019	2	8	17:00	UTC	8	998.5	97	0.5	52	1.8	8	1000.8	95	2.2	1000.6	99	0.5	53	1.5	1.5
2019	2	8	18:00	UTC	8	997.9	96	0.3	52	1.9	8	1000.8	94	2.2	1000.5	99	0	53	2.1	2
2019	2	8	19:00	UTC	8	997.4	96	0	52	1.7	8	1000.9	94	2	1000.7	96	0	52	2.2	1.7
2019	2	8	20:00	UTC	8	997	95	0.3	51	1.8	8	1001	93	2.3	1000.8	96	0	52	2.2	1.6
2019	2	8	21:00	UTC	7	996.4	91	0	51	2	7	1001.4	90	2.5	1001.2	94	0	52	1.9	1.1
2019	2	8	22:00	UTC	8	995.8	87	0	50	2	8	1002	87	2.1	1001.9	95	0	51	1.2	0.6
2019	2	8	23:00	UTC	8	995.4	88	0	50	1.8	8	1002.7	86	2.1	1002.6	94	0	51	1.4	0.4
2019	2	9	00:00	UTC	8	995.1	92	0	49	2.1	8	1003.1	89	2.7	1003	96	0	51	1.6	1.1
2019	2	9	01:00	UTC	8	994.6	92	0	50	2	8	1003.4	89	2.5	1003.3	94	0	51	2.1	1.2
2019	2	9	02:00	UTC	8	994.3	93	0	49	2.2	8	1003.5	91	2.5	1003.2	96	0	50	2	1.4
2019	2	9	03:00	UTC	8	993.7	94	0	48	1.7	8	1003.6	92	2.1	1003.4	97	0	50	1.8	1.4
2019	2	9	04:00	UTC	8	993.2	96	0	48	1.6	8	1003.3	94	2	1003.2	100	0	50	1.6	1.6
2019	2	9	05:00	UTC	8	992.5	97	0	48	1.4	8	1003.1	95	1.9	1002.9	100	0	49	1.7	1.7
2019	2	9	06:00	UTC	8	992.4	94	0	47	2.1	8	1002.8	92	2.3	1002.7	99	0	49	1.9	1.8
2019	2	9	07:00	UTC	8	992.2	94	0	47	1.9	8	1002.8	94	1.9	1002.7	99	0.4	48	1.6	1.5
2019	2	9	08:00	UTC	7	992.2	95	0	46	1.7	8	1002.6	94	1.7	1002.4	99	0.3	48	1.5	1.3
2019	2	9	09:00	UTC	8	992.2	95	0	46	1.5	8	1002.1	94	1.7	1002	99	0.3	47	1.3	1.2
2019	2	9	10:00	UTC	8	992.3	94	0	46	1.7	8	1001.8	94	1.8	1001.8	99	0	46	1.2	1.1
2019	2	9	11:00	UTC	8	992.3	95	0.8	45	1.5	8	1001.2	94	1.5	1001.2	99	0.1	47	1.1	1
2019	2	9	12:00	UTC	7	992.7	96	0.2	45	1.4	8	1000.7	95	1.4	1000.7	100	0.4	46	1.1	1.1
2019	2	9	13:00	UTC	8	993.3	96	1.3	45	1.3	8	1000.1	95	1.3	1000.1	100	0.9	46	0.9	0.9
2019	2	9	14:00	UTC	7	993.7	95	0	45	1.7	8	999.7	93	1.9	999.6	98	0	46	1.6	1.4
2019	2	9	15:00	UTC	7	994.4	94	1.1	44	1.5	8	999.5	94	1.5	999.3	99	1.4	45	1	0.9
2019	2	9	16:00	UTC	7	994.8	95	0	44	1.5	7	998.7	93	2	998.7	99	0	45	1.2	1.1
2019	2	9	17:00	UTC	7	994.9	94	0	44	1.8	7	998.5	91	2.3	998.3	97	0	44	1.8	1.3
2019	2	9	18:00	UTC	8	995.1	92	0	44	2	7	997.9	90	2.4	997.8	95	0	44	2	1.2
2019	2	9	19:00	UTC	8	995.4	88	0	43	2.3	8	997.4	87	2.4	997.3	95	0.7	44	1.8	1
2019	2	9	20:00	UTC	8	995.6	90	0.3	43	1.8	8	997	88	2.1	996.9	96	0.4	43	1.3	0.7
2019	2	9	21:00	UTC	7	995.8	89	0	43	1.9	8	996.4	87	2.1	996.4	94	0	43	1.5	0.7
2019	2	9	22:00	UTC	8	995.8	92	1.6	43	1.4	8	995.7	90	1.6	995.7	94	1.1	43	1.2	0.4
2019	2	9	23:00	UTC	8	996.1	93	0.5	43	1.4	8	995.4	92	1.4	995.3	99	0.9	43	0.8	0.7
2019	2	10	00:00	UTC	8	996	97	0.8	43	0.4	8	995	95	0.6	994.9	100	0.7	42	0.4	0.4
2019	2	10	01:00	UTC	8	995.7	98	0.6	43	0.3	8	994.5	97	0.4	994.4	100	0.5	42	0.1	0.1
2019	2	10	02:00	UTC	8	995.5	98	1.4	43	1.3	8	994.3	97	1.4	994	100	0	42	0.7	0.7
2019	2	10	03:00	UTC	8	995.1	98	0	43	1.4	8	993.6	97	1.5	993.5	100	0	43	1.2	1.2
2019	2	10	04:00	UTC	8	994.6	97	0.3	43	1.6	8	993	96	2	993	100	1	42	1.7	1.7
2019	2	10	05:00	UTC	8	994.2	98	0.6	42	1.6	8	992.4	94	1.9	992.3	100	1.2	42	1.3	1.3
2019	2	10	06:00	UTC	8	994	96	0.8	43	1.5	8	992.3	94	1.8	992.1	100	1.7	42	1.2	1.2
2019	2	10	07:00	UTC	8	993.9	97	0	43	1.5	8	992.2	94	2	992	100	1.1	42	1.4	1.4
2019	2	10	08:00	UTC	8	993.5	97	0.9	42	1.9	8	992.1	96	1.9	991.9	100	0.8	41	1.7	1.7
2019	2	10	09:00	UTC	8	993.6	98	0.3	42	2.3	8	992.1	96	2.5	992	100	0.5	41	2.2	2.2
2019	2	10	10:00	UTC	8	993.1	97	0.3	41	2.5	8	992.3	96	2.4	992	100	0.6	40	2.2	2.2
2019	2	10	11:00	UTC	8	993.4	98	0.3	41	2.5	8	992.3	96	2.5	992	100	0.5	40	2	2
2019	2	10	12:00	UTC	8	993.4	96	0	40	2.4	8	992.7	94	2.9	992.4	99	0.5	39	2.5	2.4
2019	2	10	13:00	UTC	8	993.3	94	0	40	2.3	8	993.2	91	2.8	992.8	96	0	39	2.6	2
2019	2	10	14:00	UTC	8	993.4	91	0	39	2.5	8	993.7	89	2.9	993.4	93	0	38	2.6	1.6
2019	2	10	15:00	UTC	8	993.7	91	0	40	2.3	8	994.3	88	2.8	994	91	0	38	2.6	1.4
2019	2	10	16:00	UTC	8	994	90	0	39	2.5	8	994.6	87	2.9	994.4	91	0	38	2.3	1
2019	2	10	17:00	UTC	7	994	91	0	39	2.2	8	994.8	89	2.6	994.6	93	0	38	2.1	1.1
2019	2	10	18:00	UTC	8	994.1	88	0	39	2.2	8	995.1	89	2.3	994.9	94	0	38	1.9	1.1
2019	2	10	19:00	UTC	8	994.3	88	0	39	2.3	8	995.3	84	2.8	995.1	90	0	37	2	0.5
2019	2	10	20:00	UTC	8	994.6	88	0	39	2.6	8	995.6	87	2.7	995.5	94	0	37	2	1
2019	2	10	21:00	UTC	8	995	93	0	39	2.1	8	995.8	92	2.2	995.8	96	0	36	2	1.5
2019	2	10	22:00	UTC	8	995.3	93	0	38	2	8	995.8	92	2.2	995.8	98	0	36	1.8	1.6
2019	2	10	23:00	UTC	7	996	95	0	38	1.9	8	996.1	93	2.2	996.1	99	1.7	37	1.4	1.3
2019	2	11	00:00	UTC	7	996.3	94	0	38	1.9	8	996	92	2.3	996	98	0	37	1.8	1.5
2019	2	11	01:00	UTC	8	996.8	96	0	38	1.7	8	995.8	94	2	995.8	98	1.1	36	1.1	0.9
2019	2	11	02:00	UTC	8	997.5	95	0	38	1.6	8	995.6	93	1.8	995.6	98	0	36	1.6	1.3
2019	2	11	03:00	UTC	8	998.6	94	0	38	1.6	8	995.2	92	2	995.2	98	0	36	1.5	1.2
2019	2	11	04:00	UTC	7	999.7	96	0	38	1.5	8	994.7	94	1.6	994.8	99	0	36	1	0.9
2019	2	11	05:00	UTC	7	1000.7	97	0.8	37	1.4	8	994.3	96	1.5	994.4	100	0.4	36	1	1
2019	2	11	06:00	UTC	7	1001.8	98	0.6	37	1.5	8	994.1	97	1.5	994.2	100	0.8	36	0.7	0.7
2019	2	11	07:00	UTC	8	1003	97	0.8	37	0.7	8	994	97	0.6	994.1	100	0.8	36	0.4	0.4
2019	2	11	08:00	UTC	8	1003.8	98	0.8	37	0.5	8	993.5	97	0.4	993.6	100	0.2	35	0.3	0.3
2019	2	11	09:00	UTC	8	1004.5	98	0	38	0.6	8	993.6	97	0.5
2019	2	11	10:00	UTC	8	1004.9	98	0	37	0.9	8	993.3	97	0.8	993.4	100	0.5	36	0.4	0.4
2019	2	11	11:00	UTC	8	1005.3	97	0	37	1.1	8	993.4	96	1.1	993.5	100	0	35	0.7	0.7
2019	2	11	12:00	UTC	8	1006.2	97	0.3	37	1.2	8	993.6	96	1.1	993.6	100	0.4	35	0.8	0.8
2019	2	11	13:00	UTC	7	1007	98	0	37	1.2	8	993.3	97	1	993.3	100	0	36
2019	2	11	14:00	UTC	8	1007.8	98	0	37	1.1	8	993.6	97	1	993.7	100	0	36	0.7	0.7
2019	2	11	15:00	UTC	8	1008.5	98	0	37	1.1	8	993.8	97	1	993.9	100	0	36	0.7	0.7
2019	2	11	16:00	UTC	9	1009.4	99	0	37	0.8	8	994	98	0.9	994.1	100	0	35	0.7	0.7
2019	2	11	17:00	UTC	8	1010.1	99	0.2	37	0.8	8	994.1	99	0.7	994.2	100	0	35	0.5	0.5
2019	2	11	18:00	UTC	8	1010.7	99	0.8	36	0.5	8	994.1	99	0.4	994.3	100	0.5	35	0.3	0.3
2019	2	11	19:00	UTC	8	1011.2	99	0.3	37	0.3	8	994.4	99	0.3	994.5	100	0.3	35	0.3	0.3
2019	2	11	20:00	UTC	7	1011.8	98	0.2	36	0.5	8	994.7	98	0.4	994.9	100	0.7	35	0.4	0.4
2019	2	11	21:00	UTC	7	1012.2	98	0.5	37	0.5	8	995.1	98	0.5	995.3	100	0.2	36	0.4	0.4
2019	2	11	22:00	UTC	7	1012.5	97	0.3	37	0.6	8	995.4	97	0.6	995.6	100	0.4	35	0.5	0.5
2019	2	11	23:00	UTC	7	1012.5	97	0.5	37	0.5	8	996	96	0.6	996.2	100	0.9	36	0.4	0.4
2019	2	12	00:00	UTC	7	1012.1	98	0.6	37	0.5	8	996.3	97	0.6	996.6	100	0.7	36	0.4	0.4
2019	2	12	01:00	UTC	7	1011.4	97	0.5	36	0.5	8	996.7	96	0.6	997.1	100	0.7	36	0.2	0.2
2019	2	12	02:00	UTC	7	1010.8	95	0.5	37	0.2	8	997.5	94	0.1	998	96	0.3	36	-0.4	-0.9
2019	2	12	03:00	UTC	7	1009.7	88	0	37	-0.4	8	998.5	85	-0.4	999	92	0	35	-0.9	-2
2019	2	12	04:00	UTC	7	1008.6	88	0	37	-0.9	7	999.7	86	-0.9	1000.1	92	0	35	-1.4	-2.6
2019	2	12	05:00	UTC	7	1007.8	86	0	37	-1.1	8	1000.7	85	-1.1	1001	91	0	35	-1.6	-3
2019	2	12	06:00	UTC	7	1007	86	0	37	-1.3	8	1001.8	84	-1.5	1002.2	90	0	35	-2	-3.5
2019	2	12	07:00	UTC	7	1006.8	84	0	37	-1.8	7	1002.9	82	-1.9	1003.2	88	0	35	-2.6	-4.2
2019	2	12	08:00	UTC	1	1006.4	83	0	37	-2.5	0	1003.9	82	-2.8	1004	88	0	35	-3.4	-5.1
2019	2	12	09:00	UTC	0	1006.3	77	0	37	-1.9	0	1004.6	77	-2.6	1004.9	83	0	35	-3	-5.4
2019	2	12	10:00	UTC	0	1006.3	74	0	37	-1.7	0	1005	74	-2.2	1005.3	81	0	35	-2.5	-5.3
2019	2	12	11:00	UTC	0	1006.6	68	0	37	-0.9	0	1005.3	71	-1.5	1005.5	77	0	35	-1.8	-5.3
2019	2	12	12:00	UTC	0	1007.3	70	0	37	-0.4	0	1006.2	71	-0.9	1006.3	77	0	35	-1.3	-4.9
2019	2	12	13:00	UTC	0	1007.3	71	0	37	-0.2	0	1007	73	-0.8	1007	78	0	35	-1.1	-4.4
2019	2	12	14:00	UTC	0	1007.9	73	0	37	-0.6	1	1007.8	75	-0.9	1007.8	81	0	35	-1.5	-4.4
2019	2	12	15:00	UTC	0	1008.9	79	0	37	-1.5	0	1008.5	77	-1.5	1008.7	84	0	35	-2.3	-4.6
2019	2	12	16:00	UTC	0	1008.9	81	0	37	-1.7	0	1009.4	79	-1.8	1009.4	84	0	35	-1.7	-4
2019	2	12	17:00	UTC	0	1009.5	86	0	37	-2.3	0	1010.1	82	-1.9	1010.2	88	0	35	-2.8	-4.4
2019	2	12	18:00	UTC	0	1009.9	85	0	37	-2.8	0	1010.6	83	-2.2	1010.8	89	0	35	-3.1	-4.7
2019	2	12	19:00	UTC	0	1010.3	87	0	37	-3.1	0	1011.3	85	-2.9	1011.4	91	0	35	-3.9	-5.2
2019	2	12	20:00	UTC	0	1010.5	86	0	37	-3.6	0	1011.8	85	-3.3	1011.8	91	0	35	-4.6	-5.8
2019	2	12	21:00	UTC	0	1010.3	87	0	37	-4.1	0	1012.3	86	-4	1012.3	92	0	35	-5.1	-6.3
2019	2	12	22:00	UTC	0	1010.4	89	0	37	-4.4	0	1012.4	87	-4.7	1012.5	94	0	34	-5.9	-6.6
2019	2	12	23:00	UTC	0	1010.8	90	0	37	-4.5	0	1012.5	90	-5	1012.4	97	0	34	-6.8	-7.2
2019	2	13	00:00	UTC	0	1011.4	90	0	37	-4.6	0	1012.1	91	-4.9	1012	97	0	34	-7.3	-7.7
2019	2	13	01:00	UTC	0	1012	92	0	36	-4.7	0	1011.4	95	-6	1011.5	99	0	34	-7.8	-8
2019	2	13	02:00	UTC	1	1013.3	94	0	36	-4.9	0	1010.9	95	-5.9	1010.8	99	0	34	-7.1	-7.2
2019	2	13	03:00	UTC	1	1014.6	95	0	36	-4.1	4	1009.8	96	-5.6	1009.8	99	0	35	-6.9	-7
2019	2	13	04:00	UTC	0	1015.8	94	0	36	-1.7	0	1008.7	96	-8	1008.8	99	0	34	-6.8	-6.9
2019	2	13	05:00	UTC	7	1016.9	92	0	36	-0.9	7	1007.8	97	-1.6	1007.7	100	0	35	-3	-3.1
2019	2	13	06:00	UTC	7	1017.8	90	0	36	-0.4	8	1006.9	91	-0.7	1007	98	0	35	-1.4	-1.7
2019	2	13	07:00	UTC	8	1019.3	96	1.1	37	-0.6	8	1006.8	96	-0.9	1006.7	99	2.2	35	-1	-1.1
2019	2	13	08:00	UTC	8	1019.9	96	0.9	37	-0.2	8	1006.5	96	-0.3	1006.4	100	1	36	-0.6	-0.6
2019	2	13	09:00	UTC	8	1020.4	96	0.5	38	0	8	1006.3	94	-0.1	1006.2	99	0.5	36	-0.3	-0.4
2019	2	13	10:00	UTC	8	1020.6	95	0	38	0.1	8	1006.3	94	-0.1	1006.2	100	0.2	35	-0.3	-0.4
2019	2	13	11:00	UTC	8	1020.3	95	0.5	38	0.2	8	1006.6	94	-0.2	1006.6	100	0	35	-0.2	-0.2
2019	2	13	12:00	UTC	7	1019.5	94	0	38	0.5	8	1007.4	95	0.2	1007.4	100	0	36	-0.1	-0.1
2019	2	13	13:00	UTC	8	1018.1	96	0	39	0.5	8	1007.2	96	0.4	1007.4	100	0	36	0.2	0.2
2019	2	13	14:00	UTC	8	1016.9	96	0	39	0.5	8	1007.9	94	0.4	1008	100	0	36	0.2	0.2
2019	2	13	15:00	UTC	8	1016.3	96	0	39	0.4	8	1008.8	95	0.5	1008.8	100	0	37	0.2	0.2
2019	2	13	16:00	UTC	8	1015.1	97	0	39	0.5	8	1008.8	96	0.5	1008.8	100	0	37	0.2	0.2
2019	2	13	17:00	UTC	8	1014.5	96	0	39	0.6	8	1009.5	95	0.6	1009.3	100	0	37	0.3	0.3
2019	2	13	18:00	UTC	8	1014.7	94	0	39	0.8	8	1009.9	93	0.9	1009.9	99	0	37	0.5	0.4
2019	2	13	19:00	UTC	7	1013.9	94	0	39	0.7	8	1010.3	93	1	1010.2	99	0	37	0.3	0.2
2019	2	13	20:00	UTC	1	1014.2	95	0	39	0.7	3	1010.4	91	1.2	1010.3	98	0	37	0.7	0.4
2019	2	13	21:00	UTC	7	1013.9	91	0	39	1.3	8	1010.2	88	1.6	1010.1	94	0	37	1.3	0.5
2019	2	13	22:00	UTC	7	1013.8	90	0	39	1.8	7	1010.3	88	2	1010.3	93	0	37	1.9	0.9
2019	2	13	23:00	UTC	8	1013.6	90	0	39	2	8	1010.8	89	2.2	1010.8	94	0	37	2.1	1.3
2019	2	14	00:00	UTC	8	1013.7	93	0	38	2.4	8	1011.4	92	2.6	1011.4	96	0	37	2.1	1.6
2019	2	14	01:00	UTC	7	1014.2	90	0	38	2.5	8	1012	88	2.8	1012.1	92	0	36	2.2	1
2019	2	14	02:00	UTC	7	1013.9	91	0	38	2.3	8	1013.3	89	2.5	1013.4	96	0	36	2	1.3
2019	2	14	03:00	UTC	8	1014	88	0	38	2.4	8	1014.7	86	2.6	1014.7	94	0	36	1.9	1
2019	2	14	04:00	UTC	8	1014.4	88	0	38	2	8	1015.6	85	2.3	1015.7	92	0	36	1.7	0.5
2019	2	14	05:00	UTC	7	1014.7	87	0	38	1.5	7	1016.8	85	1.9	1016.9	92	0	36	1.1	-0.1
2019	2	14	06:00	UTC	0	1015.3	89	0	38	0.3	2	1017.8	84	1.2	1018	91	0	36	0.1	-1.2
2019	2	14	07:00	UTC	0	1015.5	87	0	38	0.3	0	1019.3	84	0.7	1019.3	89	0	36	-0.1	-1.6
2019	2	14	08:00	UTC	0	1015.7	83	0	38	0.6	2	1019.8	81	0.7	1019.9	90	0	36	-0.5	-1.9
2019	2	14	09:00	UTC	0	1015.7	77	0	38	1.2	0	1020.4	78	1	1020.3	82	0	36	0.6	-2.2
2019	2	14	10:00	UTC	0	1015.8	73	0	38	1.7	0	1020.4	72	1.7	1020.3	80	0	36	1.2	-1.8
2019	2	14	11:00	UTC	1	1015.3	70	0	38	2.6	3	1020.2	70	2.3	1020.3	77	0	36	1.7	-1.9
2019	2	14	12:00	UTC	0	1014.8	75	0	38	2.3	3	1019.2	73	2.2	1019	76	0	36	1.9	-1.8
2019	2	14	13:00	UTC	0	1014.2	79	0	38	2.8	4	1018.2	76	3	1018	80	800	36	2.6	-0.5
2019	2	14	14:00	UTC	0	1014.5	85	0	38	2.2	2	1016.8	77	2.8	1016.4	72	0	36	3.4	-1.1
2019	2	14	15:00	UTC	3	1014.4	86	0	38	2	5	1016.2	82	2.3	1015.6	84	0	36	2.4	0
2019	2	14	16:00	UTC	8	1014.6	96	0	38	1	7	1015	92	1.3	1014.6	95	0	36	1.2	0.4
2019	2	14	17:00	UTC	8	1015.2	98	0	38	1.1	8	1014.8	96	1.2	1014.8	99	0	36	1	0.8
2019	2	14	18:00	UTC	8	1015.4	99	0	37	1.6	8	1014.8	97	1.7	1014.6	100	0	36	1.4	1.4
2019	2	14	19:00	UTC	8	1015.9	99	0	37	2.7	8	1013.9	97	2.8	1014	100	0	35	2.4	2.4
2019	2	14	20:00	UTC	8	1016.1	92	0	37	3.3	8	1014.2	91	3.5	1013.9	96	0	35	3	2.5
2019	2	14	21:00	UTC	7	1016	91	0	37	3.3	7	1013.9	90	3.7	1013.6	95	0	35	3.1	2.3
2019	2	14	22:00	UTC	5	1015.8	91	0	37	3	7	1013.8	89	3.4	1013.7	93	0	35	3.1	2.1
2019	2	14	23:00	UTC	5	1015	90	0	37	3.1	7	1013.6	89	3.5	1013.6	92	0	35	3.2	2
2019	2	15	00:00	UTC	1	1014.2	86	0	37	3.7	2	1013.7	81	4.3	1013.8	85	0	35	3.6	1.3
2019	2	15	01:00	UTC	1	1013.4	86	0	37	3.4	0	1014.1	82	4	1014	83	0	35	3.7	1
2019	2	15	02:00	UTC	3	1012.5	81	0	36	3.6	5	1013.9	76	4.4	1013.8	79	0	35	3.9	0.6
2019	2	15	03:00	UTC	0	1011.7	70	0	36	4.4	0	1014	65	5.4	1013.8	69	0	35	4.6	-0.6
2019	2	15	04:00	UTC	1	1010.7	80	0	36	3.4	7	1014.3	72	4.3	1014	69	0	35	4.5	-0.6
2019	2	15	05:00	UTC	1	1009.8	79	0	36	3.3	7	1014.6	75	3.9	1014.4	77	0	35	3.5	-0.1
2019	2	15	06:00	UTC	5	1009.1	75	0	36	3.9	6	1015.1	73	4.3	1015	74	0	35	3.9	-0.3
2019	2	15	07:00	UTC	0	1008.3	66	0	36	5.2	5	1015.7	63	5.6	1015.6	69	0	35	4.7	-0.6
2019	2	15	08:00	UTC	1	1007.5	66	0	36	5	0	1015.4	60	5.9	1015.3	66	0	35	5	-0.9
2019	2	15	09:00	UTC	0	1006.7	63	0	36	5.7	0	1015.7	59	6.3	1015.6	64	0	35	5.4	-0.8
2019	2	15	10:00	UTC	0	1005.9	60	0	36	6.4	0	1015.6	56	7.1	1015.5	60	0	35	6	-1
2019	2	15	11:00	UTC	0	1005.2	58	0	36	6.9	0	1015.1	54	7.6	1015	59	0	35	6.6	-0.9
2019	2	15	12:00	UTC	0	1004.6	56	0	36	7.1	0	1014.8	52	8	1014.4	55	0	35	7	-1.3
2019	2	15	13:00	UTC	0	1003.8	61	0	36	6.2	0	1014.2	55	7.2	1013.9	59	0	35	6.3	-1
2019	2	15	14:00	UTC	0	1003.2	68	0	35	6	0	1014.3	63	6.7	1014.1	71	0	35	5.4	0.5
2019	2	15	15:00	UTC	0	1002.8	74	0	35	5	0	1014.3	70	6.4	1014.1	77	0	34	4.9	1.2
2019	2	15	16:00	UTC	0	1002.5	79	0	35	4.6	0	1014.7	74	5.6	1014.6	81	0	34	4.6	1.7
2019	2	15	17:00	UTC	0	1002.1	85	0	35	3.4	0	1015.1	81	4.4	1015.2	85	0	34	3.9	1.6
2019	2	15	18:00	UTC	0	1002.4	86	0	35	3.2	0	1015.3	85	3.7	1015.2	89	0	34	3.1	1.5
2019	2	15	19:00	UTC	0	1003	87	0	35	3.4	0	1016	87	3.3	1015.9	92	0	34	2.4	1.2
2019	2	15	20:00	UTC	0	1002.6	89	0	35	2.5	0	1016	93	1.7	1016	98	0	34	0.9	0.6
2019	2	15	21:00	UTC	1	1003.4	94	0	35	1.6	2	1016	94	1.4	1015.9	99	0	34	0.3	0.1
2019	2	15	22:00	UTC	0	1004	95	0	35	1.1	0	1015.7	94	1.4	1015.8	100	0	34	0.7	0.7
2019	2	15	23:00	UTC	0	1004.6	97	0	35	0.8	0	1015	97	0.5	1014.9	100	0	34	-0.3	-0.3
2019	2	16	00:00	UTC	9	1004.9	98	0	35	0.7	7	1014.2	98	0.1	1014.2	100	0	34	-0.1	-0.1
2019	2	16	01:00	UTC	9	1005.1	99	0	35	1	9	1013.4	99	0.6	1013.4	100	0	34	0.1	0.1
2019	2	16	02:00	UTC	9	1005.7	100	0	35	1.2	9	1012.5	99	1.1	1012.5	100	0	34	0.2	0.2
2019	2	16	03:00	UTC	9	1006	100	0	35	0.9	9	1011.6	99	0.8	1011.7	100	0	34	0.4	0.4
2019	2	16	04:00	UTC	7	1006.5	100	0	35	1.1	8	1010.7	99	1.2	1010.5	100	0	34	0.7	0.7
2019	2	16	05:00	UTC	5	1007.3	100	0	35	0.8	7	1009.6	98	1.2	1009.6	100	0	34	0.7	0.7
2019	2	16	06:00	UTC	0	1008.4	99	0	35	0.4	0	1009	98	0.7	1008.9	100	0	34	-0.6	-0.6
2019	2	16	07:00	UTC	0	1009.6	94	0	35	1.2	0	1008.3	94	1.1	1008.3	100	0	34	0.1	0.1
2019	2	16	08:00	UTC	0	1010.6	82	0	35	2.8	0	1007.5	82	2.8	1007.2	93	0	34	1.9	1
2019	2	16	09:00	UTC	0	1011.6	73	0	35	4.2	0	1006.8	72	4.3	1006.6	76	0	34	3.8	0.1
2019	2	16	10:00	UTC	0	1012.4	65	0	35	5.4	0	1005.9	61	5.8	1005.8	66	0	34	5	-0.9
2019	2	16	11:00	UTC	0	1013.6	60	0	35	5.9	0	1005.1	57	6.5	1004.9	60	0	34	5.8	-1.3
2019	2	16	12:00	UTC	0	1014.5	58	0	35	6.1	0	1004.5	55	6.5	1004.4	57	0	34	6.3	-1.7
2019	2	16	13:00	UTC	0	1015.3	55	0	34	6.4	0	1003.7	55	6.8	1003.7	57	0	34	6.1	-1.8
2019	2	16	14:00	UTC	0	1016.2	59	0	34	5.7	0	1003.3	57	6	1003.4	58	0	34	5.8	-1.8
2019	2	16	15:00	UTC	0	1017.3	69	0	34	4.1	0	1002.7	63	5	1002.9	67	0	34	4.2	-1.4
2019	2	16	16:00	UTC	7	1018.3	81	0	34	2.3	7	1002.4	69	4.3	1002.3	74	0	34	3.5	-0.7
2019	2	16	17:00	UTC	7	1019.1	78	0	34	3	8	1002	74	3.6	1001.9	78	0	34	2.9	-0.5
2019	2	16	18:00	UTC	1	1019.9	81	0	34	2.6	3	1002.2	76	3.2	1002.3	78	0	34	2.9	-0.5
2019	2	16	19:00	UTC	0	1020.3	82	0	34	2.2	0	1002.9	79	2.6	1002.9	83	0	34	2	-0.6
2019	2	16	20:00	UTC	7	1020.8	81	0	34	2.4	6	1002.8	77	2.7	1002.8	82	0	34	2	-0.7
2019	2	16	21:00	UTC	1	1021.4	80	0	34	2.1	2	1003.3	76	2.4	1003.4	82	0	34	1.7	-1.1
2019	2	16	22:00	UTC	0	1021.9	76	0	34	1.9	0	1004	70	2.7	1004.1	76	0	34	1.8	-2
2019	2	16	23:00	UTC	0	1022.1	78	0	34	1.6	0	1004.6	73	2	1004.7	76	0	34	1.3	-2.4
2019	2	17	00:00	UTC	0	1022	71	0	34	1.5	0	1004.7	65	2.2	1004.7	70	0	34	1.4	-3.4
2019	2	17	01:00	UTC	0	1022.4	64	0	34	1.9	3	1004.9	64	1.9	1004.9	69	0	34	1.1	-4
2019	2	17	02:00	UTC	0	1022.2	66	0	34	1.3	0	1005.5	65	1.5	1005.3	70	0	34	0.6	-4.2
2019	2	17	03:00	UTC	0	1022.4	68	0	34	0.9	0	1005.9	65	1.3	1005.7	72	0	34	0.3	-4.2
2019	2	17	04:00	UTC	0	1022.4	69	0	34	0.8	0	1006.5	66	1.1	1006.3	71	0	34	0.3	-4.4
2019	2	17	05:00	UTC	0	1022	71	0	34	0.2	0	1007.3	68	0.7	1007.2	71	0	34	0.1	-4.5
2019	2	17	06:00	UTC	0	1021.9	71	0	34	0.1	0	1008.4	68	0.4	1008.3	71	0	34	0	-4.7
2019	2	17	07:00	UTC	0	1021.5	69	0	34	0.3	0	1009.6	66	0.7	1009.6	72	0	34	-0.1	-4.6
2019	2	17	08:00	UTC	0	1021	65	0	34	1.3	0	1010.4	64	1.3	1010.6	69	0	34	0.6	-4.3
2019	2	17	09:00	UTC	0	1019.9	61	0	34	2.3	0	1011.5	61	2	1011.5	64	0	34	1.8	-4.3
2019	2	17	10:00	UTC	0	1018.9	59	0	34	3	0	1012.3	59	2.7	1012.3	61	0	34	2.5	-4.3
2019	2	17	11:00	UTC	0	1018.1	56	0	34	3.6	0	1013.5	56	3.2	1013.6	58	0	34	3	-4.5
2019	2	17	12:00	UTC	0	1017.2	55	0	34	3.7	0	1014.4	53	3.6	1014.5	57	0	34	3.3	-4.5
2019	2	17	13:00	UTC	0	1016	52	0	34	4.1	0	1015.3	53	3.6	1015.4	55	0	34	3.4	-4.8
2019	2	17	14:00	UTC	0	1014.8	52	0	34	3.8	0	1016.2	53	3.3	1016.3	55	0	34	2.8	-5.3
2019	2	17	15:00	UTC	0	1013.8	60	0	34	2.1	0	1017.3	57	2.3	1017.4	57	0	34	2	-5.6
2019	2	17	16:00	UTC	0	1012.9	65	0	34	0.6	0	1018.3	64	0.6	1018.4	64	0	34	0.4	-5.7
2019	2	17	17:00	UTC	0	1011.5	71	0	34	-0.7	0	1019.2	66	0	1019.3	73	0	34	-1.3	-5.5
2019	2	17	18:00	UTC	0	1010.5	72	0	34	-1.2	0	1020	80	-2.6	1020.1	69	0	34	-0.8	-5.8
2019	2	17	19:00	UTC	0	1009.3	73	0	34	-1.7	0	1020.4	75	-2.8	1020.6	69	0	34	-1.2	-6.2
2019	2	17	20:00	UTC	1	1008.6	69	0	34	-1.4	0	1020.9	82	-4	1021	74	0	34	-2.7	-6.7
2019	2	17	21:00	UTC	7	1008	73	0	34	-2.4	7	1021.5	89	-6.5	1021.5	72	0	34	-2.3	-6.7
2019	2	17	22:00	UTC	5	1007.6	73	0	34	-2.5	7	1022	89	-6.5	1022.1	75	0	34	-3.3	-7.2
2019	2	17	23:00	UTC	7	1007	71	0	34	-2	7	1022.2	90	-5.2	1022.5	80	0	34	-3.6	-6.6
2019	2	18	00:00	UTC	5	1006.5	69	0	34	-1.9	7	1022.2	91	-6.3	1022.3	76	0	34	-3.3	-6.9
2019	2	18	01:00	UTC	1	1005.9	77	0	34	-3.3	7	1022.4	89	-7.2	1022.5	88	0	34	-5.2	-6.8
2019	2	18	02:00	UTC	5	1005.5	75	0	34	-3.2	7	1022.3	94	-6.6	1022.4	87	0	34	-4.9	-6.8
2019	2	18	03:00	UTC	7	1004.8	73	0	34	-2.7	7	1022.5	94	-6.2	1022.5	72	0	34	-3.3	-7.6
2019	2	18	04:00	UTC	7	1004.1	77	0	34	-2.4	8	1022.5	91	-6.4	1022.5	80	0	34	-4.1	-7.1
2019	2	18	05:00	UTC	8	1003.5	77	0	34	-0.9	8	1022.1	88	-5.1	1022.2	78	0	34	-3.2	-6.5
2019	2	18	06:00	UTC	8	1003.1	76	0	34	-0.4	8	1021.9	79	-1.1	1021.8	79	0	34	-1.7	-4.8
2019	2	18	07:00	UTC	8	1002.9	76	0	34	-0.2	8	1021.6	75	-0.4	1021.4	80	0	34	-1	-4
2019	2	18	08:00	UTC	8	1002.1	72	0	34	0.2	8	1021	75	-0.2	1020.8	77	0	34	-0.4	-3.9
2019	2	18	09:00	UTC	7	1001.1	79	0	34	0.5	8	1019.9	76	0.3	1019.8	78	0	34	0	-3.4
2019	2	18	10:00	UTC	7	1000.1	77	0	34	1.1	8	1018.8	77	0.6	1018.8	80	0	34	0.4	-2.7
2019	2	18	11:00	UTC	3	999.2	80	0	34	1	7	1018.1	80	0.9	1017.9	80	0	34	1.1	-2
2019	2	18	12:00	UTC	7	998.2	81	0	34	0.8	8	1017.2	82	0.8	1016.9	85	0	34	0.7	-1.6
2019	2	18	13:00	UTC	7	997	81	0	34	1.3	7	1016	79	1.2	1015.7	83	0	34	1	-1.6
2019	2	18	14:00	UTC	8	996.1	81	0	34	1.4	8	1014.8	82	1.3	1014.7	82	0	34	1.2	-1.5
2019	2	18	15:00	UTC	8	995.1	80	0	34	1.8	8	1013.8	81	1.6	1013.5	82	0	34	1.4	-1.4
2019	2	18	16:00	UTC	8	994.3	80	0	34	1.8	8	1012.8	76	2.2	1012.6	84	0	34	1.7	-0.7
2019	2	18	17:00	UTC	8	993.8	88	0	34	1.8	8	1011.3	86	2.1	1011.2	92	0	34	2.1	0.9
2019	2	18	18:00	UTC	8	993.2	93	0	34	1.8	8	1010.2	91	2.2	1009.9	97	0	34	1.8	1.4
2019	2	18	19:00	UTC	8	992.6	94	0	34	1.8	8	1009.2	93	2	1009	98	0	34	1.8	1.5
2019	2	18	20:00	UTC	8	992.3	96	0	34	1.7	8	1008.4	94	2.1	1008.4	99	0	34	1.5	1.4
2019	2	18	21:00	UTC	8	992	98	0	34	1.5	8	1007.8	95	2	1007.7	100	0	33	1.4	1.4
2019	2	18	22:00	UTC	8	991.6	98	0	33	1.6	8	1007.3	97	1.8	1007.1	100	0	34	1.5	1.5
2019	2	18	23:00	UTC	8	991.1	99	0	33	1.7	8	1007	97	1.9	1006.8	100	0	33	1.6	1.6
2019	2	19	00:00	UTC	8	990.9	99	0	33	1.7	8	1006.4	98	1.9	1006.2	100	0	33	1.5	1.5
2019	2	19	01:00	UTC	9	990.6	100	0	33	1.8	8	1005.7	99	1.9	1005.6	100	0	33	1.5	1.5
2019	2	19	02:00	UTC	9	990.4	100	0	33	1.6	8	1005.4	99	1.9	1005.2	100	0	33	1.5	1.5
2019	2	19	03:00	UTC	9	990.3	100	0	33	1.6	9	1004.6	99	1.9	1004.4	100	0	32	1.4	1.4
2019	2	19	04:00	UTC	9	990.2	100	0	32	1.7	9	1004.1	99	1.9	1003.8	100	0	33	1.3	1.3
2019	2	19	05:00	UTC	9	990.1	100	0	32	1.6	9	1003.4	99	1.9	1003.2	100	0	33	1.3	1.3
2019	2	19	06:00	UTC	9	990	100	0	32	1.6	9	1003	99	1.8	1002.9	100	0	33	1.4	1.4
2019	2	19	07:00	UTC	9	990.1	100	0	32	1.5	9	1002.8	99	1.7	1002.6	100	0	33	1.5	1.4
2019	2	19	08:00	UTC	9	990.5	100	0	32	1.4	9	1002	99	1.5	1001.8	100	0	33	1.4	1.4
2019	2	19	09:00	UTC	9	991.6	100	0	32	1.5	9	1001	99	1.6	1000.9	100	0	33	1.4	1.4
2019	2	19	10:00	UTC	8	993.5	100	0	32	1.7	8	999.9	99	1.9	999.7	100	0	32	1.4	1.4
2019	2	19	11:00	UTC	8	994.9	100	0	31	1.6	8	999.1	99	1.9	999.1	100	0	32	1.6	1.6
2019	2	19	12:00	UTC	7	996.3	100	0.5	31	1.5	8	998.2	99	1.7	998	100	0	32	1.5	1.5
2019	2	19	13:00	UTC	9	997.9	100	0	31	1.6	8	996.9	99	1.8	996.8	100	0	32	1.5	1.5
2019	2	19	14:00	UTC	8	999.3	100	1.1	31	1.7	8	996	98	2	995.9	100	0.7	32	1.3	1.3
2019	2	19	15:00	UTC	8	1000.7	100	1.4	31	1.6	8	995.1	97	1.7	994.9	100	1	32	1.2	1.2
2019	2	19	16:00	UTC	7	1002.3	100	0.5	31	1.5	8	994.2	98	1.8	994.1	100	0.5	32	1.4	1.4
2019	2	19	17:00	UTC	8	1003.7	100	1.4	31	1.7	8	993.8	96	1.7	993.7	100	0.8	32	1.2	1.2
2019	2	19	18:00	UTC	8	1005.3	100	0	31	1.5	8	993.1	97	1.9	992.9	100	0	32	1.4	1.4
2019	2	19	19:00	UTC	8	1007.3	100	0	31	1.7	8	992.7	96	2.2	992.6	100	0	32	1.7	1.7
2019	2	19	20:00	UTC	7	1008.6	100	0	31	1.8	8	992.2	97	2.4	992.2	100	0	31	1.7	1.7
2019	2	19	21:00	UTC	7	1009.9	100	0	31	1.9	8	991.9	98	2.4	991.8	100	0	31	1.9	1.9
2019	2	19	22:00	UTC	8	1011.3	99	0	31	2.1	8	991.6	97	2.5	991.5	100	0	31	1.9	1.9
2019	2	19	23:00	UTC	8	1012.7	99	0	31	2.2	8	991	97	2.6	991	100	0	31	1.9	1.9
2019	2	20	00:00	UTC	7	1013.9	99	0	31	2.1	8	990.9	97	2.5	990.8	100	0	30	1.8	1.8
2019	2	20	01:00	UTC	8	1015.1	98	0	30	2.5	8	990.5	97	2.4	990.5	100	0	31	1.9	1.9
2019	2	20	02:00	UTC	8	1016.2	97	0	30	2.4	8	990.3	96	2.5	990.3	100	0	31	1.9	1.9
2019	2	20	03:00	UTC	7	1017	96	0	30	2.4	8	990.3	94	2.6	990.2	100	0	31	1.9	1.9
2019	2	20	04:00	UTC	8	1018	95	0	30	2.3	8	990.1	93	2.4	990	98	0	31	2.1	1.8
2019	2	20	05:00	UTC	8	1019	92	0	30	2.2	8	990.1	92	2.3	989.9	96	0	31	1.9	1.3
2019	2	20	06:00	UTC	7	1019.8	91	0	30	2	8	989.8	89	2.2	989.8	94	0	31	1.7	0.8
2019	2	20	07:00	UTC	8	1020.6	92	0	30	1.8	8	990	90	1.9	989.9	96	0	31	1.4	0.8
2019	2	20	08:00	UTC	7	1021.6	88	0	30	1.9	8	990.3	90	1.8	990.4	94	0	31	1.2	0.3
2019	2	20	09:00	UTC	7	1022.4	86	0	30	0.8	8	991.5	86	0.9	991.5	94	0	31	0.3	-0.6
2019	2	20	10:00	UTC	8	1023	74	0	30	-1.1	8	993.4	76	-1.6	993.8	81	0	31	-1.7	-4.6
2019	2	20	11:00	UTC	7	1023.7	72	0	30	-2.1	8	994.7	76	-2.6	994.9	78	0	31	-3	-6.2
2019	2	20	12:00	UTC	7	1024.1	70	0	29	-2.4	7	996.2	69	-2.7	996.2	72	0	31	-2.9	-7.3
2019	2	20	13:00	UTC	7	1024.8	71	0	29	-2.8	8	997.6	68	-3.1	997.6	72	0	31	-3.5	-7.8
2019	2	20	14:00	UTC	7	1025.5	69	0	29	-3	7	999.1	62	-3	999.4	67	0	31	-3.3	-8.6
2019	2	20	15:00	UTC	7	1026.2	65	0	29	-3.2	8	1000.5	63	-3.3	1000.8	66	0	31	-3.7	-9
2019	2	20	16:00	UTC	7	1027.2	68	0	29	-3.6	7	1002.2	65	-3.5	1002.6	67	0	31	-3.9	-9.1
2019	2	20	17:00	UTC	7	1028.3	64	0	29	-3.6	7	1003.5	62	-3.7	1004	67	0	31	-4.1	-9.3
2019	2	20	18:00	UTC	1	1029.1	60	0	29	-4.1	6	1005	60	-4.2	1005.4	62	0	31	-4.7	-10.8
2019	2	20	19:00	UTC	5	1029.9	61	0	29	-4.5	7	1007	60	-4.6	1007.4	64	0	31	-4.9	-10.7
2019	2	20	20:00	UTC	5	1030.8	63	0	29	-4.8	7	1008.4	65	-4.9	1008.6	67	0	31	-5.4	-10.5
2019	2	20	21:00	UTC	5	1032	64	0	29	-5.1	7	1009.8	65	-5	1010.1	69	0	31	-5.5	-10.3
2019	2	20	22:00	UTC	5	1033.1	64	0	29	-5.1	7	1011.2	63	-5.1	1011.3	67	0	31	-5.6	-10.8
2019	2	20	23:00	UTC	0	1033.6	65	0	29	-5.5	0	1012.7	65	-5.7	1012.9	68	0	31	-6	-11
2019	2	21	00:00	UTC	0	1034.5	67	0	29	-6	0	1013.9	67	-6.1	1014.2	71	0	31	-6.6	-11.1
2019	2	21	01:00	UTC	0	1035.4	69	0	29	-6.7	0	1015.1	68	-6.5	1015.3	71	0	31	-7.1	-11.5
2019	2	21	02:00	UTC	0	1036.1	69	0	29	-7	0	1016.3	68	-7.2	1016.5	70	0	31	-7.5	-12.1
2019	2	21	03:00	UTC	0	1037.1	68	0	29	-7.4	0	1017.1	67	-7.6	1017.4	71	0	31	-8	-12.4
2019	2	21	04:00	UTC	0	1037.9	68	0	29	-8	0	1018	68	-8	1018.3	70	0	31	-8.4	-12.8
2019	2	21	05:00	UTC	0	1038.6	68	0	29	-8.3	0	1019	68	-8.6	1019.3	70	0	31	-8.9	-13.4
2019	2	21	06:00	UTC	0	1039.6	69	0	29	-8.9	0	1019.9	68	-9	1020.1	70	0	31	-9.4	-13.8
2019	2	21	07:00	UTC	0	1040.3	66	0	29	-8.3	0	1020.7	68	-8.9	1020.9	70	0	31	-9.1	-13.5
2019	2	21	08:00	UTC	0	1041.3	61	0	28	-7.3	0	1021.8	63	-8.1	1022	66	0	31	-8.3	-13.6
2019	2	21	09:00	UTC	0	1041.8	56	0	28	-6.2	0	1022.5	60	-7.2	1022.8	63	0	31	-7.3	-13.1
2019	2	21	10:00	UTC	0	1042.1	53	0	28	-5.5	0	1023.2	56	-6.2	1023.5	59	0	31	-6.4	-13.1
2019	2	21	11:00	UTC	0	1041.9	45	0	29	-4.9	0	1023.7	45	-5.4	1024	47	0	31	-5.6	-15.2
2019	2	21	12:00	UTC	0	1042.2	41	0	28	-4.3	0	1024.2	42	-4.9	1024.4	45	0	31	-5	-15.1
2019	2	21	13:00	UTC	0	1041.7	42	0	28	-4.2	0	1024.9	42	-4.5	1025.1	46	0	31	-4.8	-14.6
2019	2	21	14:00	UTC	0	1041.4	40	0	28	-4.4	0	1025.5	47	-5	1025.7	48	0	31	-5	-14.3
2019	2	21	15:00	UTC	0	1040.9	45	0	29	-5	0	1026.3	51	-5.9	1026.5	48	0	31	-5.6	-14.9
2019	2	21	16:00	UTC	0	1040.4	50	0	29	-6	0	1027.4	56	-7.2	1027.6	57	0	31	-7.2	-14.2
2019	2	21	17:00	UTC	0	1039.9	53	0	28	-6.7	0	1028.4	57	-7.7	1028.6	59	0	31	-8.1	-14.7
2019	2	21	18:00	UTC	0	1039.5	54	0	28	-7.1	0	1029.2	58	-8.4	1029.4	62	0	31	-8.8	-14.8
2019	2	21	19:00	UTC	0	1038.9	57	0	28	-7.8	0	1030.1	57	-8.2	1030.4	64	0	31	-9.4	-15
2019	2	21	20:00	UTC	0	1037.8	59	0	28	-8.2	0	1030.9	61	-8.9	1031.1	66	0	31	-9.9	-15
2019	2	21	21:00	UTC	0	1037	61	0	28	-8.7	0	1032.2	63	-9.4	1032.4	66	0	31	-9.9	-15.1
2019	2	21	22:00	UTC	0	1035.8	62	0	28	-9	0	1033.3	64	-9.4	1033.5	68	0	31	-10.3	-15
2019	2	21	23:00	UTC	0	1034.7	65	0	28	-9.4	0	1033.8	68	-10.2	1034.1	71	0	31	-10.6	-14.9
2019	2	22	00:00	UTC	0	1033.7	69	0	28	-10.1	0	1034.7	70	-11	1034.9	73	0	31	-11.1	-15
2019	2	22	01:00	UTC	0	1032.6	71	0	28	-10.5	0	1035.5	72	-11.4	1035.7	76	0	31	-11.6	-14.9
2019	2	22	02:00	UTC	0	1030.9	73	0	28	-10.9	0	1036.3	76	-11.8	1036.4	78	0	31	-12	-15
2019	2	22	03:00	UTC	0	1030.2	76	0	28	-11.4	0	1037.3	77	-12.1	1037.5	81	0	31	-12.4	-15.1
2019	2	22	04:00	UTC	0	1028.8	76	0	28	-11.5	0	1038.1	81	-12.7	1038.4	82	0	31	-12.9	-15.3
2019	2	22	05:00	UTC	0	1028.7	76	0	28	-11.6	0	1038.8	82	-12.9	1039.1	84	0	31	-13.3	-15.5
2019	2	22	06:00	UTC	0	1028.7	78	0	28	-11.9	0	1039.8	85	-14.1	1040	84	0	31	-13.4	-15.5
2019	2	22	07:00	UTC	0	1028.6	73	0	28	-11	0	1040.5	77	-12.1	1040.8	81	0	31	-12.6	-15.2
2019	2	22	08:00	UTC	0	1027.9	64	0	28	-9.4	0	1041.4	68	-10.4	1041.6	74	0	31	-10.9	-14.7
2019	2	22	09:00	UTC	0	1027.6	56	0	28	-7.2	0	1042	61	-8.5	1042.2	65	0	31	-8.9	-14.3
2019	2	22	10:00	UTC	0	1027	50	0	28	-5.5	0	1042.2	52	-6.3	1042.3	56	0	31	-6.7	-14
2019	2	22	11:00	UTC	0	1027.1	42	0	28	-4.1	0	1041.9	48	-4.8	1042.2	51	0	31	-5.7	-14.2
2019	2	22	12:00	UTC	0	1026.5	38	0	28	-3.2	0	1042.2	43	-4.2	1042.2	49	0	31	-4.3	-13.4
2019	2	22	13:00	UTC	0	1026.2	33	0	28	-2.3	0	1041.7	34	-3	1041.8	39	0	31	-3	-14.9
2019	2	22	14:00	UTC	0	1025.7	40	0	28	-2.7	0	1041.4	37	-3	1041.3	40	0	31	-2.9	-14.8
2019	2	22	15:00	UTC	0	1025.6	47	0	28	-4.1	2	1040.9	37	-3.7	1040.8	44	0	31	-4.9	-15.3
2019	2	22	16:00	UTC	3	1026.2	47	0	28	-4.6	7	1040.5	40	-4.4	1040.4	46	0	31	-5.4	-15.2
2019	2	22	17:00	UTC	5	1026.3	55	0	28	-5.1	6	1040	49	-4.9	1039.9	55	0	31	-6.6	-14.2
2019	2	22	18:00	UTC	7	1026.3	51	0	28	-4.8	8	1039.6	50	-4.9	1039.5	56	0	31	-6	-13.3
2019	2	22	19:00	UTC	7	1026.1	58	0	28	-5	7	1039	55	-5.3	1039	58	0	31	-6.3	-13.2
2019	2	22	20:00	UTC	5	1025.9	66	0	29	-4.8	5	1037.8	63	-4.7	1037.8	67	0	31	-6.1	-11.3
2019	2	22	21:00	UTC	7	1025.8	73	0	29	-3.8	8	1037	71	-3.6	1036.9	73	0	31	-4.9	-8.9
2019	2	22	22:00	UTC	7	1025.9	76	0	29	-2.4	8	1035.8	74	-2.5	1035.7	77	0	31	-3.6	-7
2019	2	22	23:00	UTC	7	1025.7	75	0	29	-1.5	8	1034.8	73	-1.5	1034.6	79	0	31	-2.6	-5.7
2019	2	23	00:00	UTC	7	1025.2	77	0	29	-0.9	8	1033.8	75	-1	1033.6	81	0	31	-2	-4.8
2019	2	23	01:00	UTC	9	1024.7	91	1.4	29	-1.7	8	1032.7	90	-1.7	1032.6	95	1	31	-2.3	-3
2019	2	23	02:00	UTC	7	1024.5	92	0.4	29	-1	8	1031	91	-1	1030.9	97	1.3	31	-1.4	-1.8
2019	2	23	03:00	UTC	7	1024.2	93	0.5	30	-0.5	8	1030.4	91	-0.4	1030.4	97	0.2	32	-1	-1.4
2019	2	23	04:00	UTC	7	1023.5	92	0	30	-0.4	8	1028.7	90	-0.3	1029.3	94	0	32	-0.7	-1.5
2019	2	23	05:00	UTC	7	1023.1	91	0	30	-0.3	8	1028.6	89	-0.2	1028.6	95	0	32	-0.7	-1.4
2019	2	23	06:00	UTC	7	1022.8	89	0	30	-0.2	8	1029.1	88	-0.2	1028.6	93	0	32	-0.6	-1.6
2019	2	23	07:00	UTC	8	1021.6	90	0	30	-0.3	8	1028.4	89	-0.2	1028.2	94	0	32	-0.7	-1.5
2019	2	23	08:00	UTC	8	1020.9	90	0	30	0	8	1027.8	89	-0.1	1027.8	94	0	32	-0.4	-1.2
2019	2	23	09:00	UTC	8	1020.4	90	0.7	30	0.3	8	1027.5	89	0.3	1027.7	94	0	32	0	-0.9
2019	2	23	10:00	UTC	8	1018.9	88	0	30	1	8	1027.1	88	0.9	1027.1	94	0	32	0.6	-0.3
2019	2	23	11:00	UTC	7	1018.2	85	0	30	2.2	8	1027.1	86	2	1027.1	93	0	32	1.3	0.3
2019	2	23	12:00	UTC	1	1017.2	82	0	30	3.3	5	1026.6	84	2.8	1026.6	91	0	32	2.2	0.8
2019	2	23	13:00	UTC	0	1017	77	0	30	4.6	0	1026.2	82	3.6	1026.3	88	0	32	2.9	1.1
2019	2	23	14:00	UTC	0	1016.8	78	0	30	4.6	1	1025.7	78	4.9	1025.7	84	0	32	3.8	1.5
2019	2	23	15:00	UTC	0	1017.2	81	0	30	4.2	0	1025.6	79	4.8	1025.7	86	0	32	3.9	1.7
2019	2	23	16:00	UTC	0	1017.6	83	0	30	3.3	2	1026.1	81	4.4	1026.2	88	0	32	3.6	1.7
2019	2	23	17:00	UTC	0	1018	86	0	30	2.8	0	1026.3	82	3.8	1026.2	90	0	32	2.5	1
2019	2	23	18:00	UTC	0	1017.8	88	0	30	2.3	5	1026.2	86	2.5	1026.2	92	0	31	2.2	1
2019	2	23	19:00	UTC	7	1018	89	0	30	2.2	7	1026.1	87	2.8	1026.1	92	0	32	2.3	1.1
2019	2	23	20:00	UTC	8	1017.7	90	0	30	2.1	8	1025.9	88	2.6	1025.8	94	0	32	2	1.1
2019	2	23	21:00	UTC	7	1017.1	90	0	30	2.1	8	1025.7	91	1.8	1025.7	94	0	32	2.3	1.4
2019	2	23	22:00	UTC	5	1016.5	90	0	30	2	7	1025.9	90	2.1	1026.1	94	0	32	2	1.2
2019	2	23	23:00	UTC	7	1015.6	91	0	30	1.4	8	1025.5	92	1.7	1025.5	94	0	32	1.6	0.8
2019	2	24	00:00	UTC	7	1014.9	90	0	30	1.4	8	1025.2	90	1.4	1025.1	92	0	32	1.6	0.4
2019	2	24	01:00	UTC	5	1014.4	90	0	30	1.4	6	1024.8	90	1.4	1024.5	94	0	32	1.2	0.3
2019	2	24	02:00	UTC	7	1014.4	92	0	30	0.9	8	1024.4	91	1	1024.5	98	0	32	0	-0.3
2019	2	24	03:00	UTC	7	1014.3	92	0	30	0.9	7	1024.1	92	0.9	1024.2	98	0	32	0.1	-0.2
2019	2	24	04:00	UTC	5	1014.1	93	0	30	0.7	7	1023.5	92	0.7	1023.5	99	0	32	-0.6	-0.7
2019	2	24	05:00	UTC	5	1014	94	0	30	0.5	7	1023	92	0.6	1022.9	99	0	32	-0.1	-0.2
2019	2	24	06:00	UTC	7	1014.4	95	0	30	1	8	1022.9	92	1	1022.9	98	0	32	0.4	0.1
2019	2	24	07:00	UTC	5	1014.1	94	0	30	1.4	7	1021.5	91	1.5	1021.3	97	0	31	0.5	0
2019	2	24	08:00	UTC	8	1014.2	99	0	30	1.2	7	1020.7	97	1.3	1020.6	96	0	31	1.6	1
2019	2	24	09:00	UTC	8	1014	98	0	30	1.4	8	1020.4	95	1.7	1020	98	0	32	1.5	1.3
2019	2	24	10:00	UTC	8	1014.5	98	0	30	1.3	8	1018.8	96	1.6	1018.7	98	0	32	1.6	1.3
2019	2	24	11:00	UTC	8	1014.9	98	0	30	1.6	8	1018.1	94	2	1018.1	100	0	32	1.6	1.6
2019	2	24	12:00	UTC	8	1015.9	95	0	29	2.3	8	1017.1	93	2.4	1016.9	98	0	31	2.1	1.9
2019	2	24	13:00	UTC	8	1015.3	93	0	29	2.7	8	1017	91	2.9	1016.8	96	0	31	2.6	2
2019	2	24	14:00	UTC	7	1015.9	89	0	29	3.2	8	1016.8	88	3.6	1016.8	93	0	31	2.7	1.7
2019	2	24	15:00	UTC	1	1016	86	0	29	3.7	2	1017.2	85	3.9	1017.4	91	0	31	3.3	1.9
2019	2	24	16:00	UTC	1	1015.9	85	0	29	3.5	1	1017.5	82	4.1	1017.4	83	0	31	4.3	1.6
2019	2	24	17:00	UTC	1	1016.3	85	0	29	3.5	1	1017.9	80	4.2	1017.8	85	0	31	3.5	1.2
2019	2	24	18:00	UTC	0	1015.8	79	0	29	3.7	0	1017.8	76	4.4	1017.9	82	0	31	3.4	0.6
2019	2	24	19:00	UTC	0	1015.4	72	0	29	3.9	0	1017.9	68	4.7	1017.9	75	0	31	3.6	-0.4
2019	2	24	20:00	UTC	0	1014.7	66	0	29	4.4	0	1017.7	63	5	1017.5	70	0	31	3.7	-1.2
2019	2	24	21:00	UTC	0	1014.5	65	0	29	4.3	0	1017	62	4.8	1017.1	70	0	31	3.5	-1.6
2019	2	24	22:00	UTC	0	1014	61	0	29	4.8	0	1016.5	59	5.2	1016.4	64	0	31	4.4	-1.8
2019	2	24	23:00	UTC	0	1013.5	60	0	29	4.8	0	1015.6	57	5.5	1015.5	64	0	31	4.4	-1.9
2019	2	25	00:00	UTC	0	1013.3	62	0	29	4.7	0	1014.9	59	5.2	1014.8	66	0	31	4.1	-1.7
2019	2	25	01:00	UTC	0	1012.8	59	0	29	5.1	0	1014.4	59	5.3	1014.3	64	0	31	4.5	-1.8
2019	2	25	02:00	UTC	0	1012.9	61	0	29	4.9	3	1014.5	61	4.9	1014.4	65	0	31	4.2	-1.7
2019	2	25	03:00	UTC	0	1013.4	64	0	29	4.4	7	1014.3	61	5	1014.4	66	0	31	4.3	-1.6
2019	2	25	04:00	UTC	0	1014.3	63	0	29	4.8	4	1014.1	62	4.9	1013.9	67	0	31	4.2	-1.4
2019	2	25	05:00	UTC	0	1015	64	0	29	4.3	0	1014	62	4.9	1014.2	67	0	31	3.9	-1.6
2019	2	25	06:00	UTC	0	1016.1	63	0	28	4.5	0	1014.2	61	4.9	1014.1	67	0	31	4	-1.6
2019	2	25	07:00	UTC	1	1016.9	60	0	29	5.1	5	1014	61	5	1014.1	63	0	31	4.7	-1.7
2019	2	25	08:00	UTC	0	1017.6	58	0	28	5.7	0	1014	59	5.4	1014.2	62	0	31	4.9	-1.7
2019	2	25	09:00	UTC	0	1018	54	0	29	6.6	0	1013.8	56	6.1	1013.8	56	0	31	5.9	-2.2
2019	2	25	10:00	UTC	0	1019	51	0	29	7.2	0	1014.2	53	6.6	1014.4	55	0	31	6.2	-2.1
2019	2	25	11:00	UTC	0	1019.9	49	0	29	7.6	0	1014.8	52	6.8	1014.7	53	0	31	6.8	-2.2
2019	2	25	12:00	UTC	0	1020.5	49	0	29	7.9	0	1015.8	53	6.8	1016	54	0	31	6.6	-2
2019	2	25	13:00	UTC	0	1020.6	49	0	28	7.8	0	1015.1	51	7.2	1015.3	54	0	31	6.7	-2
2019	2	25	14:00	UTC	0	1021.4	54	0	29	6.7	0	1015.8	55	6.3	1015.7	55	0	31	6.3	-2.2
2019	2	25	15:00	UTC	1	1022.2	60	0	29	5.5	5	1016	58	5.7	1016	61	0	31	5	-1.9
2019	2	25	16:00	UTC	7	1022.4	64	0	28	4.4	7	1015.9	60	5	1015.9	67	0	31	3.9	-1.7
2019	2	25	17:00	UTC	7	1022.9	67	0	29	3.9	8	1016.2	63	4.5	1016.2	68	0	31	3.7	-1.7
2019	2	25	18:00	UTC	8	1022.9	68	0	29	3.6	8	1015.8	65	4	1015.7	72	0	31	3	-1.6
2019	2	25	19:00	UTC	8	1023	70	0	29	3.2	8	1015.3	66	3.7	1015.4	74	0	31	2.7	-1.5
2019	2	25	20:00	UTC	8	1023.3	72	0	29	3	8	1014.8	69	3.3	1014.8	75	0	31	2.5	-1.5
2019	2	25	21:00	UTC	7	1022.7	70	0	29	3	8	1014.4	70	3	1014.4	76	0	31	2.3	-1.5
2019	2	25	22:00	UTC	8	1022.6	77	0	29	2.9	8	1014	74	3.1	1014.1	84	0	31	2.3	-0.1
2019	2	25	23:00	UTC	8	1021.9	85	0	29	2.3	8	1013.5	82	2.6	1013.6	90	0	31	1.8	0.3
2019	2	26	00:00	UTC	9	1021	93	1	28	1.3	8	1013.2	92	1.6	1013.3	98	0.4	31	0.9	0.7
2019	2	26	01:00	UTC	7	1019.9	96	0	28	1	8	1012.9	94	1.2	1012.9	100	0	31	0.7	0.7
2019	2	26	02:00	UTC	8	1018.5	97	0	28	0.9	8	1012.9	94	1.2	1012.9	100	0	31	0.7	0.7
2019	2	26	03:00	UTC	8	1017.3	95	0	29	1.6	8	1013.4	96	1.3	1013.4	99	0	31	1.2	1.1
2019	2	26	04:00	UTC	8	1015.4	93	0	28	1.8	8	1014.3	93	1.7	1014.4	97	0	31	1.5	1.1
2019	2	26	05:00	UTC	8	1014.3	91	0	28	1.9	8	1014.8	88	1.7	1015.1	95	0	31	1.4	0.7
2019	2	26	06:00	UTC	8	1013.1	89	0	28	1.8	8	1016	89	1.6	1016.3	96	0	31	1.2	0.7
2019	2	26	07:00	UTC	8	1011.1	88	0	28	2	8	1016.9	88	1.8	1017.1	96	0	31	1.4	0.7
2019	2	26	08:00	UTC	7	1009.8	84	0	28	2.4	8	1017.5	93	1.7	1017.9	94	0	30	1.5	0.7
2019	2	26	09:00	UTC	8	1009.2	82	0	28	2.7	8	1018	83	2.2	1018.3	88	0	30	1.9	0.2
2019	2	26	10:00	UTC	7	1007.5	78	0	28	3.2	7	1019.1	84	2.5	1019.4	86	0	30	2.2	0.1
2019	2	26	11:00	UTC	3	1006.7	73	0	28	4	6	1020	77	3.1	1020.2	81	0	31	3	0.1
2019	2	26	12:00	UTC	0	1004.9	70	0	28	4.5	6	1020.5	73	3.6	1020.6	79	0	30	3.5	0.1
2019	2	26	13:00	UTC	1	1003.5	67	0	28	5	1	1020.7	75	3.5	1021	81	0	30	3.4	0.5
2019	2	26	14:00	UTC	1	1002.1	69	0	28	4.9	0	1021.6	75	3.7	1021.7	81	0	30	3.2	0.2
2019	2	26	15:00	UTC	0	1001	75	0	28	3.8	0	1022.2	77	3.4	1022.5	82	0	30	2.9	0.1
2019	2	26	16:00	UTC	0	999.8	80	0	28	2.7	0	1022.4	80	2.6	1022.5	87	0	30	1.8	-0.2
2019	2	26	17:00	UTC	0	998.2	86	0	28	1.7	0	1022.9	82	2.3	1023.1	86	0	30	1.8	-0.3
2019	2	26	18:00	UTC	0	996.7	88	0	28	1.1	0	1023	92	0.2	1023.1	86	0	30	1.8	-0.2
2019	2	26	19:00	UTC	0	995.8	90	0	28	0.5	0	1023.2	96	-1.6	1023.4	93	0	30	0.1	-0.9
2019	2	26	20:00	UTC	3	994.9	93	0	28	0	6	1023.3	97	-2.6	1023.4	94	0	30	0	-0.9
2019	2	26	21:00	UTC	1	993.9	93	0	28	-0.2	2	1022.8	98	-1.6	1023.1	98	0	30	-0.9	-1.3
2019	2	26	22:00	UTC	5	993.2	94	0	28	-0.1	6	1022.7	98	-2.1	1022.4	99	0	30	-1.3	-1.5
2019	2	26	23:00	UTC	7	992.2	92	0	28	0.2	7	1022	97	-1.9	1021.8	99	0	30	-1.2	-1.3
2019	2	27	00:00	UTC	7	991	92	0	28	0.3	8	1021	97	-1.3	1020.8	99	0	30	-0.9	-1
2019	2	27	01:00	UTC	7	989.9	92	0	28	0.7	7	1019.9	91	0.6	1019.9	99	0	30	-0.2	-0.4
2019	2	27	02:00	UTC	7	988.9	91	0	28	1.1	8	1018.6	89	1.4	1018.6	96	0	30	0.8	0.2
2019	2	27	03:00	UTC	7	988.2	90	0	28	1.4	8	1017.3	88	1.7	1017.2	95	0	30	0.9	0.2
2019	2	27	04:00	UTC	7	987.4	90	0	28	1.6	8	1015.3	88	1.8	1015.3	94	0	30	1.3	0.5
2019	2	27	05:00	UTC	7	987.1	91	0	28	1.7	7	1014.3	89	1.9	1014.4	96	0	30	1	0.4
2019	2	27	06:00	UTC	7	986.5	88	0	28	1.9	7	1013	88	1.9	1012.8	95	0	30	1.2	0.4
2019	2	27	07:00	UTC	7	986.1	90	0	28	1.8	7	1011	86	2.2	1011.1	90	0	30	1.7	0.3
2019	2	27	08:00	UTC	7	986.2	86	0	28	2.4	6	1009.7	85	2.4	1009.8	89	0	30	2	0.4
2019	2	27	09:00	UTC	5	986.2	84	0	28	2.9	7	1009	82	2.9	1009	86	0	30	2.4	0.4
2019	2	27	10:00	UTC	5	986.5	80	0	28	3.4	5	1007.5	78	3.5	1007.7	81	0	30	3.3	0.4
2019	2	27	11:00	UTC	1	986.9	74	0	28	4.4	1	1006.6	74	4.4	1006.5	74	0	30	4.2	-0.1
2019	2	27	12:00	UTC	0	987.3	69	0	28	4.9	1	1004.7	62	5.9	1004.7	66	0	30	5.1	-0.7
2019	2	27	13:00	UTC	0	988.5	69	0	28	4.9	1	1003.4	63	5.7	1003.3	67	0	30	5.4	-0.3
2019	2	27	14:00	UTC	0	989.7	67	0	28	5.1	0	1002	64	5.6	1002	68	0	30	5.1	-0.4
2019	2	27	15:00	UTC	0	991	66	0	28	4.4	0	1000.8	60	5.4	1000.8	66	0	30	4.2	-1.6
2019	2	27	16:00	UTC	1	993	61	0	28	4.5	1	999.7	60	4.7	999.7	62	0	30	4.3	-2.4
2019	2	27	17:00	UTC	0	994.7	64	0	28	3.4	0	998	58	4.2	997.9	61	0	30	3.7	-3.1
2019	2	27	18:00	UTC	0	996.2	61	0	28	3.5	0	996.6	57	4	996.5	58	0	30	3.7	-3.7
2019	2	27	19:00	UTC	0	997.3	55	0	28	4.2	0	995.6	51	4.9	995.4	58	0	30	3.5	-3.9
2019	2	27	20:00	UTC	0	998.4	56	0	28	3.9	3	994.8	52	4.8	994.6	58	0	30	3.5	-4
2019	2	27	21:00	UTC	0	999.5	59	0	28	3.4	5	993.7	53	4.7	993.7	59	0	30	3.6	-3.7
2019	2	27	22:00	UTC	7	1000.5	60	0	28	3.6	8	993	55	4.7	992.9	60	0	30	4	-3
2019	2	27	23:00	UTC	7	1001.3	63	0	28	3.6	7	992	58	4.7	991.9	64	0	30	3.8	-2.3
2019	2	28	00:00	UTC	7	1002.2	63	0	28	4.6	7	991	62	4.6	990.9	69	0	30	3.8	-1.4
2019	2	28	01:00	UTC	3	1003	67	0	28	4.1	3	989.8	67	4	989.7	74	0	30	3	-1.3
2019	2	28	02:00	UTC	7	1003.7	71	0	28	3.6	8	988.9	69	3.9	988.8	75	0	30	2.9	-1
2019	2	28	03:00	UTC	3	1004.5	73	0	28	3.2	6	988.1	71	3.7	988.1	79	0	30	2.3	-1
2019	2	28	04:00	UTC	5	1004.9	75	0	28	3	3	987.3	74	3	987.4	82	0	30	1.8	-0.9
2019	2	28	05:00	UTC	7	1005.7	77	0	28	2.6	7	987.2	78	2.3	987.1	85	0	30	1.4	-0.8
2019	2	28	06:00	UTC	7	1006.2	80	0	28	2	5	986.4	80	2	986.5	86	0	30	1.3	-0.8
2019	2	28	07:00	UTC	5	1006.9	78	0	28	2.4	6	986	78	2.4	986.2	86	0	30	1.4	-0.7
2019	2	28	08:00	UTC	3	1007.3	78	0	28	2.7	7	986	76	2.8	986	81	0	30	2.6	-0.5
2019	2	28	09:00	UTC	7	1007.9	73	0	28	3.7	8	986.2	76	3.2	986.2	81	0	30	2.9	-0.1
2019	2	28	10:00	UTC	8	1008.2	85	0	27	3	8	986.5	87	2.3	986.6	92	0	30	2.2	0.9
2019	2	28	11:00	UTC	8	1008.4	86	0	27	3.1	8	986.8	87	2.5	987	92	0	29	2.2	1.1
2019	2	28	12:00	UTC	7	1008.5	82	0	27	3.2	8	987.3	84	2.8	987.6	89	0	30	2.5	0.8
2019	2	28	13:00	UTC	7	1008.5	87	0	26	2.8	8	988.5	87	2.4	988.9	94	0	29	2.1	1.3
2019	2	28	14:00	UTC	8	1008.5	90	0	27	2.4	8	989.6	89	2.3	990.1	96	0	29	1.6	1.1
2019	2	28	15:00	UTC	5	1008.7	82	0	27	1.9	7	991	82	1.8	991.7	85	0	28	1.1	-1.1
2019	2	28	16:00	UTC	7	1009.2	73	0	27	0.6	8	993.1	75	0.4	993.6	77	0	28	-0.1	-3.7
2019	2	28	17:00	UTC	8	1009.2	75	0	27	-0.7	8	994.9	71	-0.8	995.3	79	0	28	-1.4	-4.6
2019	2	28	18:00	UTC	5	1009	63	0	26	-1.4	7	996.2	64	-1.5	996.7	68	0	28	-1.8	-6.9
2019	2	28	19:00	UTC	7	1008.8	64	0	26	-1.8	8	997.4	65	-1.9	997.8	65	0	28	-2.4	-8
2019	2	28	20:00	UTC	7	1008.7	54	0	26	-2.6	5	998.5	55	-2.9	998.8	61	0	28	-3.1	-9.6
2019	2	28	21:00	UTC	5	1008.4	52	0	26	-3.3	7	999.3	53	-3.5	999.8	56	0	28	-3.6	-11.1
2019	2	28	22:00	UTC	8	1007.9	52	0	26	-3.4	8	1000.6	49	-3.6	1000.7	58	0	28	-3.9	-11
2019	2	28	23:00	UTC	7	1007.2	57	0	26	-3.8	8	1001.4	57	-4	1001.6	56	0	28	-4.6	-11.9
2019	3	1	00:00	UTC	7	1006.3	64	0	26	-4.6	8	1002.2	72	-5.1	1002.5	70	0	28	-5.4	-9.9
2019	3	1	01:00	UTC	7	1005.3	78	0	26	-5.4	8	1003.1	79	-5.7	1003.4	64	0	28	-5.7	-11.5
2019	3	1	02:00	UTC	0	1004.1	64	0	26	-6.3	0	1003.8	65	-6.5	1004.1	67	0	28	-6.9	-12
2019	3	1	03:00	UTC	0	1003.4	67	0	26	-6.9	0	1004.5	68	-7.1	1004.8	71	0	28	-7.5	-11.9
2019	3	1	04:00	UTC	0	1002.8	72	0	26	-7.3	0	1005	73	-7.7	1005.2	77	0	28	-8	-11.3
2019	3	1	05:00	UTC	0	1002	72	0	26	-7.6	0	1005.7	73	-7.9	1006	76	0	28	-8.4	-11.8
2019	3	1	06:00	UTC	0	1001.4	73	0	26	-7.8	0	1006.3	73	-8.3	1006.6	76	0	28	-8.5	-12
2019	3	1	07:00	UTC	0	1001	69	0	26	-7.3	0	1006.9	71	-7.8	1007.2	73	0	28	-7.9	-11.9
2019	3	1	08:00	UTC	0	1000.3	64	0	26	-6.4	0	1007.4	67	-6.9	1007.6	69	0	28	-6.8	-11.5
2019	3	1	09:00	UTC	0	999.3	58	0	26	-5	0	1007.9	62	-5.8	1008.2	63	0	28	-5.7	-11.7
2019	3	1	10:00	UTC	0	998.1	55	0	26	-4.1	0	1008.2	55	-4.6	1008.4	59	0	28	-4.9	-11.7
2019	3	1	11:00	UTC	0	996.7	50	0	26	-3.6	0	1008.4	53	-3.7	1008.5	57	0	28	-4	-11.2
2019	3	1	12:00	UTC	0	995.2	48	0	26	-2.8	0	1008.6	51	-3.6	1008.7	55	0	28	-3.3	-11.2
2019	3	1	13:00	UTC	0	993.8	46	0	26	-2.6	0	1008.5	49	-3.3	1008.6	50	0	28	-3.2	-12.1
2019	3	1	14:00	UTC	0	993.4	43	0	26	-2.5	0	1008.5	48	-3.4	1008.6	47	0	28	-3.2	-12.8
2019	3	1	15:00	UTC	0	993.3	43	0	26	-3	0	1008.7	47	-3.5	1008.8	46	0	28	-3.8	-13.8
2019	3	1	16:00	UTC	0	993	45	0	26	-4.3	0	1009.2	46	-4.4	1009.2	44	0	28	-4.3	-14.6
2019	3	1	17:00	UTC	0	993.1	51	0	26	-5.4	0	1009.2	49	-5.1	1009.2	58	0	28	-6.5	-13.3
2019	3	1	18:00	UTC	0	993.9	53	0	26	-6.2	6	1008.9	50	-5.8	1009	56	0	28	-6.8	-14.2
2019	3	1	19:00	UTC	5	994.3	56	0	26	-6.1	7	1008.8	52	-6.1	1008.8	61	0	28	-7.5	-13.7
2019	3	1	20:00	UTC	5	994.9	56	0	26	-6	5	1008.7	56	-6.3	1008.6	65	0	28	-7.7	-13.2
2019	3	1	21:00	UTC	7	996.1	55	0	26	-6	6	1008.4	54	-5.8	1008.4	60	0	28	-6.7	-13.1
2019	3	1	22:00	UTC	7	996.6	62	0	26	-5.7	7	1007.9	60	-5.6	1007.8	67	0	28	-6.4	-11.4
2019	3	1	23:00	UTC	5	997.2	71	0	26	-5.1	8	1007.2	68	-5.2	1007.2	74	0	28	-6.1	-10.1
2019	3	2	00:00	UTC	8	997.5	73	0	26	-4.3	8	1006.3	71	-4.2	1006.1	77	0	28	-5	-8.4
2019	3	2	01:00	UTC	8	998.1	77	0	26	-3.1	8	1005.2	74	-3.1	1005.1	79	0	28	-4.2	-7.3
2019	3	2	02:00	UTC	7	998.4	79	0	26	-2	7	1004	77	-2.2	1004.1	83	0	28	-3.2	-5.8
2019	3	2	03:00	UTC	7	998.9	80	0	26	-1.5	8	1003.4	78	-1.5	1003.5	85	0	28	-3.1	-5.3
2019	3	2	04:00	UTC	7	998.8	81	0	26	-1.5	8	1002.9	80	-1.7	1002.9	87	0	28	-2.9	-4.8
2019	3	2	05:00	UTC	3	999	83	0	26	-1.8	4	1002.1	81	-1.6	1002.1	91	0	28	-3.8	-5
2019	3	2	06:00	UTC	0	999.3	84	0	26	-1.7	0	1001.5	84	-2.1	1001.5	93	0	28	-3.5	-4.6
2019	3	2	07:00	UTC	0	999.4	80	0	26	-0.8	0	1001	81	-1.2	1000.9	88	0	28	-2	-3.8
2019	3	2	08:00	UTC	0	999.3	73	0	26	0.2	0	1000.2	72	0.1	1000.1	79	0	28	-0.5	-3.8
2019	3	2	09:00	UTC	0	999.1	64	0	26	1.6	0	999.2	61	1.7	998.9	66	0	28	1.3	-4.3
2019	3	2	10:00	UTC	1	998.9	69	0	26	2.4	2	997.9	65	2.3	997.6	61	0	28	2.2	-4.6
2019	3	2	11:00	UTC	5	999	71	0	26	2.4	3	996.5	67	2.3	996.2	59	0	28	2.6	-4.7
2019	3	2	12:00	UTC	3	998.4	75	0	26	1.9	4	995	71	2.1	994.5	70	0	28	2.1	-2.9
2019	3	2	13:00	UTC	7	997.8	72	0	26	2.6	7	993.7	72	2.5	993.5	66	0	28	2.6	-3
2019	3	2	14:00	UTC	7	997.1	66	0	26	2.8	8	993.2	65	2.8	993	70	0	28	2.3	-2.6
2019	3	2	15:00	UTC	7	996.4	69	0	26	2.1	7	993.3	67	2.3	993.3	74	0	27	1.8	-2.5
2019	3	2	16:00	UTC	7	995.8	72	0	26	1.8	8	992.9	71	1.9	992.8	77	0	28	1.4	-2.2
2019	3	2	17:00	UTC	8	995.4	77	0	26	1.6	8	993.1	76	1.6	993.5	97	0.7	28	-0.1	-0.5
2019	3	2	18:00	UTC	7	994.6	79	0	26	1.1	8	993.9	81	1	993.8	92	0	27	0.2	-0.9
2019	3	2	19:00	UTC	7	994	75	0	26	1.1	7	994.3	76	1.1	994.2	81	0	28	0.3	-2.6
2019	3	2	20:00	UTC	7	993.7	70	0	26	0.8	7	995.1	71	0.5	995.2	72	0	28	-0.5	-5
2019	3	2	21:00	UTC	3	993.2	59	0	26	-0.6	7	996.1	63	-1.1	996.2	68	0	28	-2	-7
2019	3	2	22:00	UTC	0	992.7	60	0	26	-1.7	0	996.6	63	-2.2	996.8	68	0	28	-3	-8
2019	3	2	23:00	UTC	3	992.5	67	0	26	-2.8	7	997.3	69	-3.3	997.3	73	0	28	-3.9	-8
2019	3	3	00:00	UTC	0	992.5	73	0	26	-3.8	1	997.6	73	-4.4	997.8	78	0	28	-5.1	-8.4
2019	3	3	01:00	UTC	0	992.5	75	0	26	-5.1	0	998.1	73	-5.5	998.2	77	0	29	-6.1	-9.5
2019	3	3	02:00	UTC	1	992	75	0	26	-6.1	5	998.5	76	-6.4	998.6	80	0	29	-7	-9.8
2019	3	3	03:00	UTC	1	991.8	77	0	26	-6.8	0	998.9	77	-7.1	999.1	81	0	29	-7.7	-10.4
2019	3	3	04:00	UTC	0	991.5	78	0	26	-7.5	1	998.9	78	-7.8	999	84	0	29	-8.6	-10.8
2019	3	3	05:00	UTC	0	991.3	78	0	26	-8.3	0	999.1	79	-8.6	999.2	83	0	29	-9.1	-11.5
2019	3	3	06:00	UTC	5	991.3	76	0	26	-8.4	0	999.5	79	-9	999.6	84	0	30	-9.6	-11.8
2019	3	3	07:00	UTC	1	991.3	73	0	26	-7.9	0	999.4	76	-8.7	999.6	80	0	29	-9.1	-12
2019	3	3	08:00	UTC	0	991	67	0	26	-7	0	999.3	71	-7.8	999.4	74	0	29	-8.1	-11.9
2019	3	3	09:00	UTC	0	990.6	64	0	26	-6.4	0	999.3	67	-6.9	999.4	68	0	29	-6.5	-11.5
2019	3	3	10:00	UTC	3	990.4	61	0	26	-5	1	999.1	64	-5.6	999.1	65	0	29	-5.8	-11.3
2019	3	3	11:00	UTC	1	990.2	59	0	26	-4.3	4	998.9	56	-4.2	999	60	0	29	-4.7	-11.4
2019	3	3	12:00	UTC	1	989.4	58	0	26	-3.8	4	998.3	54	-3.5	998.4	56	0	29	-3.6	-11.2
2019	3	3	13:00	UTC	5	989	67	0	26	-4.3	6	997.8	63	-4.3	997.8	59	0	29	-3.9	-10.9
2019	3	3	14:00	UTC	7	988.3	68	0	26	-4.6	7	997.1	68	-4.6	997	61	0	29	-3.8	-10.2
2019	3	3	15:00	UTC	7	987.9	73	0	26	-4.7	5	996.5	71	-4.9	996.5	68	0	29	-4.6	-9.7
2019	3	3	16:00	UTC	5	987.4	74	0	26	-4.8	7	996	74	-5.3	996	73	0	29	-5.3	-9.3
2019	3	3	17:00	UTC	7	986.7	73	0	26	-4.7	2	995.6	72	-5.3	995.7	77	0	29	-5.6	-9.1
2019	3	3	18:00	UTC	7	986.1	78	0	26	-4.5	2	994.9	74	-5.5	995	77	0	29	-6.2	-9.5
2019	3	3	19:00	UTC	7	985	79	0	26	-4.4	7	994.2	76	-5.5	994.4	76	0	29	-6.7	-10.2
2019	3	3	20:00	UTC	7	984.5	80	0	26	-4.1	7	993.8	76	-5.9	994	78	0	29	-7.3	-10.6
2019	3	3	21:00	UTC	7	983.2	81	0	26	-3.8	8	993.4	78	-5.7	993.6	80	0	29	-6.6	-9.4
2019	3	3	22:00	UTC	8	982.1	79	0	26	-3.6	8	993	78	-5.5	993.1	82	0	29	-6.5	-9.1
2019	3	3	23:00	UTC	7	981.3	80	0	26	-3.6	8	992.8	77	-5.7	993	82	0	29	-6.5	-9.1
2019	3	4	00:00	UTC	7	981	79	0	26	-5.1	8	992.7	79	-5.7	992.9	83	0	29	-6.4	-8.9
2019	3	4	01:00	UTC	7	980.3	79	0	26	-5.2	8	992.7	80	-5.7	992.9	84	0	29	-6.4	-8.7
2019	3	4	02:00	UTC	8	979.7	81	0	26	-5.3	8	992.2	81	-5.8	992.3	86	0	29	-6.5	-8.5
2019	3	4	03:00	UTC	7	979.5	82	0	26	-5	8	991.9	81	-5.5	992.1	86	0	29	-6.3	-8.3
2019	3	4	04:00	UTC	7	979.6	82	0	26	-5.2	8	991.7	82	-5.6	991.9	87	0	29	-6.5	-8.3
2019	3	4	05:00	UTC	7	980.1	82	0	26	-5.2	8	991.6	82	-5.6	991.8	87	0	29	-6.4	-8.2
2019	3	4	06:00	UTC	7	980.7	82	0	26	-5.1	8	991.3	82	-5.5	991.5	86	0	29	-6.3	-8.2
2019	3	4	07:00	UTC	7	981.4	80	0	26	-4.4	8	991.4	81	-5.1	991.5	85	0	29	-5.6	-7.7
2019	3	4	08:00	UTC	7	982.1	78	0	26	-3.7	8	991.1	79	-4.2	991.2	83	0	29	-4.8	-7.2
2019	3	4	09:00	UTC	7	983.1	78	0	26	-2.7	8	990.7	78	-3.4	990.8	82	0	29	-3.9	-6.5
2019	3	4	10:00	UTC	7	984.3	80	0	26	-2.3	8	990.5	81	-2.7	990.6	82	0	29	-3.1	-5.8
2019	3	4	11:00	UTC	7	985.5	81	0	26	-1.9	8	990.3	82	-2.6	990.3	82	0	29	-2.8	-5.5
2019	3	4	12:00	UTC	7	986.6	82	0	26	-2	8	989.5	82	-2.3	989.6	82	0	29	-2.5	-5.2
2019	3	4	13:00	UTC	7	988	82	0	26	-1.9	8	989.1	82	-2.1	989.1	84	0	29	-2.5	-4.8
2019	3	4	14:00	UTC	7	989.5	84	0	26	-2	8	988.3	83	-2.1	988.4	85	0	29	-2.6	-4.8
2019	3	4	15:00	UTC	7	991.2	86	0	26	-2.1	8	988	84	-2.2	988	86	0	29	-2.6	-4.5
2019	3	4	16:00	UTC	7	993.1	86	0	26	-2	8	987.5	87	-2.2	987.6	89	0	29	-2.6	-4.2
2019	3	4	17:00	UTC	7	994.9	88	0	26	-1.9	8	986.8	88	-2.1	986.9	91	0	29	-2.6	-3.8
2019	3	4	18:00	UTC	7	996.7	89	0	26	-1.7	8	986.2	88	-1.8	986.3	93	0	29	-2.6	-3.6
2019	3	4	19:00	UTC	7	998.2	87	0	26	-1.7	8	985.1	89	-1.8	985.4	94	0	29	-2.7	-3.5
2019	3	4	20:00	UTC	7	999.7	88	0	26	-1.7	8	984.6	87	-1.9	984.9	94	0	29	-2.7	-3.4
2019	3	4	21:00	UTC	7	1001.5	88	0	26	-1.7	8	983.4	88	-2	983.5	95	0	29	-2.8	-3.5
2019	3	4	22:00	UTC	7	1002.9	89	0	26	-2	8	982.4	89	-2.3	982.6	95	0	29	-2.9	-3.6
2019	3	4	23:00	UTC	7	1004	89	0	26	-2.2	8	981.6	89	-2.6	981.8	94	0	29	-3.1	-4
2019	3	5	00:00	UTC	7	1005.2	90	0	26	-2.6	8	981.2	89	-2.9	981.5	93	0	29	-3.5	-4.5
2019	3	5	01:00	UTC	9	1006.1	93	0.8	26	-3.3	8	980.5	92	-3.4	980.7	94	0	29	-3.5	-4.3
2019	3	5	02:00	UTC	9	1007	93	1.2	27	-3.4	8	979.9	92	-3.5	980.2	95	0.7	29	-3.8	-4.5
2019	3	5	03:00	UTC	9	1007.9	92	0.3	28	-3.6	8	979.7	91	-3.6	980	94	0.5	29	-3.9	-4.7
2019	3	5	04:00	UTC	9	1008.7	91	0.6	29	-3.7	8	979.9	89	-3.8	980.1	93	0.2	30	-4.2	-5.2
2019	3	5	05:00	UTC	7	1009.4	87	0	29	-4.2	8	980.2	88	-4.4	980.5	91	0.3	31	-4.5	-5.8
2019	3	5	06:00	UTC	7	1010	85	0	30	-4.1	8	980.8	82	-4.2	981.1	83	0	31	-4.4	-6.9
2019	3	5	07:00	UTC	7	1010.5	77	0	30	-3.7	8	981.5	78	-4.1	981.8	78	0	31	-4.3	-7.5
2019	3	5	08:00	UTC	7	1011.1	72	0	30	-3.5	8	982.3	72	-3.9	982.6	77	0	30	-4.3	-7.7
2019	3	5	09:00	UTC	5	1011.6	73	0	29	-3.4	7	983.2	74	-4	983.5	78	0	31	-4.3	-7.5
2019	3	5	10:00	UTC	3	1011.8	70	0	29	-3.4	6	984.3	69	-3.7	984.8	72	0	29	-3.8	-8.2
2019	3	5	11:00	UTC	7	1011.8	67	0	29	-3.2	7	985.6	72	-4.1	986.1	71	0	29	-4.2	-8.7
2019	3	5	12:00	UTC	3	1011.4	64	0	29	-3.2	7	986.8	68	-4.5	987.2	63	0	29	-4.1	-10.1
2019	3	5	13:00	UTC	1	1011.2	54	0	29	-3.6	2	988	56	-3.9	988.2	58	0	30	-3.7	-10.7
2019	3	5	14:00	UTC	0	1010.9	48	0	29	-3.5	0	989.6	50	-4	989.9	51	0	29	-4.2	-12.8
2019	3	5	15:00	UTC	0	1010.5	50	0	29	-4.3	0	991.3	50	-4.5	991.6	55	0	30	-5.2	-12.8
2019	3	5	16:00	UTC	0	1010.1	54	0	28	-5.7	0	993.1	55	-6	993.5	53	0	29	-6.4	-14.3
2019	3	5	17:00	UTC	0	1010	53	0	28	-6.7	0	994.9	54	-7	995.3	56	0	28	-7.5	-14.8
2019	3	5	18:00	UTC	0	1009.8	56	0	28	-7.7	0	996.6	55	-7.8	996.9	58	0	28	-8.2	-15.1
2019	3	5	19:00	UTC	0	1009.7	55	0	28	-8.4	0	998.3	52	-8.6	998.5	55	0	28	-9	-16.5
2019	3	5	20:00	UTC	0	1009.4	51	0	28	-9.1	0	999.8	52	-9.3	1000.1	54	0	28	-10	-17.6
2019	3	5	21:00	UTC	0	1009.2	52	0	28	-9.9	0	1001.4	52	-10	1001.6	55	0	28	-10.4	-17.8
2019	3	5	22:00	UTC	0	1008.8	55	0	28	-10.4	0	1003	56	-10.7	1003.2	60	0	28	-11.2	-17.5
2019	3	5	23:00	UTC	0	1008.4	58	0	28	-10.8	0	1004.1	60	-11.5	1004.3	63	0	29	-11.6	-17.2
2019	3	6	00:00	UTC	0	1007.7	64	0	28	-12	0	1005.3	63	-11.9	1005.4	68	0	29	-12.3	-16.9
2019	3	6	01:00	UTC	0	1007.1	67	0	28	-12.3	0	1006.3	69	-13.4	1006.5	72	0	29	-13	-17
2019	3	6	02:00	UTC	0	1006.4	69	0	28	-12.5	0	1007.1	73	-13.6	1007.3	76	0	29	-14.1	-17.3
2019	3	6	03:00	UTC	0	1005.8	78	0	28	-14.3	0	1008	82	-15.6	1008.1	81	0	29	-15	-17.6
2019	3	6	04:00	UTC	0	1005.4	80	0	28	-15.1	0	1008.8	88	-16.5	1008.8	82	0	29	-15.2	-17.6
2019	3	6	05:00	UTC	0	1004.9	82	0	28	-15.1	0	1009.5	85	-18.6	1009.6	86	0	29	-15.7	-17.5
2019	3	6	06:00	UTC	0	1004.5	81	0	28	-14.5	0	1010.1	83	-17	1010.2	81	0	30	-15.1	-17.7
2019	3	6	07:00	UTC	0	1003.8	59	0	28	-10.5	0	1010.7	72	-13	1010.7	74	0	30	-13.6	-17.1
2019	3	6	08:00	UTC	0	1003.3	43	0	28	-7.8	0	1011.3	55	-9.6	1011.3	61	0	30	-10.4	-16.5
2019	3	6	09:00	UTC	0	1002.5	31	0	28	-6.5	0	1011.5	30	-6.6	1011.5	34	0	30	-6.8	-20.2
2019	3	6	10:00	UTC	0	1001.6	32	0	28	-5.3	0	1011.8	26	-5.6	1011.7	30	0	30	-5.5	-20.5
2019	3	6	11:00	UTC	0	1000.3	30	0	28	-4.3	0	1011.8	28	-4.7	1011.8	32	0	30	-4.6	-19
2019	3	6	12:00	UTC	0	998.9	52	0	28	-3.3	0	1011.4	49	-4.3	1011.4	54	0	30	-4.3	-12.3
2019	3	6	13:00	UTC	3	998	48	0	28	-3.3	1	1011	48	-3.6	1011	46	0	30	-3.8	-13.8
2019	3	6	14:00	UTC	7	997.4	62	0	28	-4	8	1010.8	56	-4	1010.7	56	0	30	-4.2	-11.7
2019	3	6	15:00	UTC	7	996.4	62	0	28	-4	8	1010.5	58	-4	1010.4	61	0	29	-4.4	-10.8
2019	3	6	16:00	UTC	7	995.8	65	0	28	-4.1	7	1010.1	63	-4	1010.1	66	0	29	-4.6	-10
2019	3	6	17:00	UTC	8	995.1	73	0	28	-3.7	8	1010.1	68	-3.7	1010	70	0	29	-4.6	-9.2
2019	3	6	18:00	UTC	8	994.3	76	0	28	-3.2	8	1009.8	74	-3.2	1009.8	77	0	29	-4.3	-7.7
2019	3	6	19:00	UTC	8	993.4	78	0	28	-3.2	8	1009.7	76	-3.1	1009.6	82	0	29	-3.9	-6.5
2019	3	6	20:00	UTC	8	992.7	79	0	28	-2.8	8	1009.4	79	-2.8	1009.3	87	0	29	-3.6	-5.5
2019	3	6	21:00	UTC	8	992	84	0	28	-2.5	8	1009.2	84	-2.4	1009.2	87	0	29	-3.1	-5
2019	3	6	22:00	UTC	8	991.4	87	0	28	-1.9	8	1008.8	86	-2.1	1008.7	90	0	29	-2.6	-4
2019	3	6	23:00	UTC	8	990.7	93	0	28	-1.7	8	1008.4	92	-1.7	1008.3	96	0	29	-2.3	-2.8
2019	3	7	00:00	UTC	7	989.9	95	0.4	28	-1.6	8	1007.7	94	-1.7	1007.5	97	0	29	-2	-2.4
2019	3	7	01:00	UTC	8	989.2	90	0	28	-0.8	8	1007.1	91	-1	1006.9	98	0	29	-1.6	-1.9
2019	3	7	02:00	UTC	8	988.7	89	0	29	-0.4	8	1006.4	88	-0.4	1006.3	97	0	29	-1.1	-1.6
2019	3	7	03:00	UTC	8	988.4	89	0	29	-0.3	8	1005.8	87	-0.2	1005.7	95	0	29	-0.9	-1.5
2019	3	7	04:00	UTC	7	988.4	87	0	29	-0.4	8	1005.4	84	-0.2	1005.3	93	0	28	-0.7	-1.7
2019	3	7	05:00	UTC	8	988.9	86	0	29	-0.4	8	1005	85	-0.4	1004.9	91	0	26	-0.8	-2.1
2019	3	7	06:00	UTC	8	989.3	86	0	29	-0.6	8	1004.5	84	-0.7	1004.5	90	0	28	-0.7	-2.2
2019	3	7	07:00	UTC	7	989.5	81	0	28	-0.5	7	1003.9	81	-0.5	1003.8	87	0	29	-0.9	-2.7
2019	3	7	08:00	UTC	7	989.4	80	0	28	-0.2	8	1003.3	78	-0.3	1003.3	83	0	29	-0.6	-3
2019	3	7	09:00	UTC	8	989.4	87	0.4	29	-0.3	8	1002.5	87	-0.7	1002.4	91	0	31	-0.8	-2
2019	3	7	10:00	UTC	8	989.1	90	0.6	29	-0.3	8	1001.7	90	-0.3	1001.6	94	0.8	30	-0.7	-1.5
2019	3	7	11:00	UTC	8	988.6	95	0.5	30	-0.2	8	1000.4	94	-0.6	1000.4	98	1.3	30	-0.8	-1
2019	3	7	12:00	UTC	8	988	94	0.8	31	0.3	8	998.8	94	0	998.9	98	0.2	29	0	-0.3
2019	3	7	13:00	UTC	8	987.2	96	1.6	31	0.5	8	998	95	0.1	998.1	99	1	33	0	-0.2
2019	3	7	14:00	UTC	8	986.4	98	1.1	32	0.4	8	997.4	97	0.2	997.3	100	1	32	0.1	0.1
2019	3	7	15:00	UTC	8	985.5	98	0.8	33	0.3	8	996.4	97	0.3	996.4	100	0.9	32	0.2	0.2
2019	3	7	16:00	UTC	8	984.8	98	0.9	33	0	8	995.9	97	0	995.7	100	0.4	32	0	0
2019	3	7	17:00	UTC	8	983.7	98	0.3	34	0.2	8	995.1	97	0	995.2	100	0.4	33	-0.2	-0.2
2019	3	7	18:00	UTC	8	982.8	98	0	34	0.3	8	994.4	98	0.3	994.3	100	0	33	0	0
2019	3	7	19:00	UTC	8	981.8	98	0	34	0.5	8	993.6	98	0.4	993.5	100	0	32	0.3	0.3
2019	3	7	20:00	UTC	8	981.2	98	0.5	34	0.7	8	992.9	97	0.6	992.9	100	0.2	34	0.3	0.3
2019	3	7	21:00	UTC	8	980.8	98	0.4	33	1	8	992.1	98	0.9	992.1	100	0	35	0.4	0.4
2019	3	7	22:00	UTC	8	980.3	99	0.2	33	1.2	8	991.5	98	1.3	991.4	100	0	35	1.1	1.1
2019	3	7	23:00	UTC	7	980	99	0.8	33	1.5	8	990.8	98	1.7	990.7	100	0.4	34	1.2	1.2
2019	3	8	00:00	UTC	8	979.3	99	0.8	32	1.8	8	989.9	98	2	989.8	100	0.7	34	1.6	1.6
2019	3	8	01:00	UTC	8	978.6	99	0.5	32	2.1	8	989.1	98	2.2	989.1	100	0.5	34	1.9	1.9
2019	3	8	02:00	UTC	8	979.3	99	0	31	1.8	8	988.6	97	2.6	988.5	100	0	34	2.3	2.3
2019	3	8	03:00	UTC	7	982.1	97	0	31	2.6	8	988.3	96	2.7	988.2	100	0	34	2.2	2.2
2019	3	8	04:00	UTC	8	984.5	95	0	31	2.5	8	988.4	93	2.8	988.2	100	0	33	2.5	2.5
2019	3	8	05:00	UTC	8	986.6	94	0	31	2.6	8	988.8	92	3.1	988.7	99	0	33	2.5	2.4
2019	3	8	06:00	UTC	7	987.9	94	0	30	2.5	8	989.2	93	2.7	989	99	0	32	2.5	2.3
2019	3	8	07:00	UTC	7	988.6	90	0	30	2.7	8	989.4	90	2.8	989.2	95	0	32	2.4	1.7
2019	3	8	08:00	UTC	5	989.6	87	0	30	3.1	7	989.4	88	2.9	989.1	92	0	32	3.1	1.9
2019	3	8	09:00	UTC	8	990.5	89	0	29	2.7	8	989.3	89	2.7	989.1	95	0	31	2.5	1.7
2019	3	8	10:00	UTC	7	991.4	89	0	29	3.3	8	989	90	2.9	988.8	94	0	31	2.9	2.1
2019	3	8	11:00	UTC	7	991.8	85	0	29	4.3	8	988.5	88	3.7	988.4	94	0	30	3.2	2.3
2019	3	8	12:00	UTC	7	992	85	0	28	4.2	7	988	84	4.4	987.9	91	0	30	3.9	2.5
2019	3	8	13:00	UTC	7	992	84	0	28	4.4	7	987.1	85	4.4	987	90	0	29	4.2	2.7
2019	3	8	14:00	UTC	7	991.7	85	0	27	4.1	7	986.2	82	4.8	986.2	87	0	29	4.1	2.2
2019	3	8	15:00	UTC	7	991.4	90	0.6	27	3.5	8	985.4	87	4.4	985.4	93	0.7	29	3.8	2.8
2019	3	8	16:00	UTC	7	990.9	93	1.7	27	3	8	984.5	90	3.9	984.7	97	2.2	28	3.4	2.9
2019	3	8	17:00	UTC	8	990.4	95	0.8	27	2.8	8	983.7	95	3	983.5	97	0	28	2.7	2.2
2019	3	8	18:00	UTC	8	989.8	94	0	27	3.1	8	982.8	93	3.3	982.6	98	0	28	3.1	2.8
2019	3	8	19:00	UTC	7	988.9	95	0	26	2.7	8	981.7	93	3.2	981.6	98	0	27	2.9	2.6
2019	3	8	20:00	UTC	8	988.1	96	0.8	26	2.5	8	981.2	94	2.6	981.1	99	0.4	27	2.3	2.2
2019	3	8	21:00	UTC	8	987.3	98	0	26	2.2	8	980.8	97	2.3	980.6	100	0.5	27	2	2
2019	3	8	22:00	UTC	8	986.5	98	0	26	2.3	8	980.3	96	2.5	980.1	100	0	26	2.1	2.1
2019	3	8	23:00	UTC	8	985.7	96	1.5	26	1	8	979.8	94	1.5	979.6	99	0	27	1.5	1.4
2019	3	9	00:00	UTC	8	984.9	97	0	26	0.4	8	979.3	95	0.5	979.1	100	0.7	27	0.4	0.4
2019	3	9	01:00	UTC	8	984.1	98	1.2	26	0.3	8	978.7	97	0.4	978.7	100	0.3	27	0.2	0.2
2019	3	9	02:00	UTC	8	983.4	98	0.6	27	0.3	8	979.2	98	0.4	979.3	100	1.3	28	0.2	0.2
2019	3	9	03:00	UTC	8	982.8	93	0	27	-1.6	8	981.8	87	-1.5	981.9	95	0	29	-2.2	-2.9
2019	3	9	04:00	UTC	7	982.6	90	0.3	27	-2.1	8	984.4	89	-2.1	984.4	94	0	30	-2.7	-3.5
2019	3	9	05:00	UTC	7	982.7	80	0	27	-2.1	8	986.4	80	-2	986.2	87	0	30	-2.6	-4.5
2019	3	9	06:00	UTC	7	983.3	83	0	27	-2.1	8	987.9	80	-2	987.8	86	0	30	-2.7	-4.7
2019	3	9	07:00	UTC	7	983.9	85	0	27	-1.3	8	988.6	86	-1.7	988.5	92	0.5	29	-2.4	-3.5
2019	3	9	08:00	UTC	5	984.4	79	0	27	-0.5	7	989.4	79	-0.8	989.2	87	0	29	-1.2	-3
2019	3	9	09:00	UTC	1	985.4	74	1.2	27	-0.3	6	990.4	73	-0.3	990.2	80	0	29	-0.8	-3.9
2019	3	9	10:00	UTC	1	985.8	73	0	27	-0.2	4	991.3	69	-0.2	991.1	73	0	29	-0.3	-4.5
2019	3	9	11:00	UTC	1	986.5	71	0	27	1.3	2	991.8	68	0.7	991.7	72	0	29	0.6	-3.9
2019	3	9	12:00	UTC	3	987	65	0	27	1.9	2	991.9	62	1.7	991.8	67	0	29	1.4	-4.1
2019	3	9	13:00	UTC	7	987.5	73	0	27	1.3	7	992	66	1.4	991.8	67	0	29	0.9	-4.6
2019	3	9	14:00	UTC	7	987.8	69	0	27	1.5	7	991.6	68	1.5	991.5	68	0	29	1	-4.3
2019	3	9	15:00	UTC	7	988.2	83	0	27	0.8	7	991.3	75	1.3	991.1	74	0	29	1.1	-3.1
2019	3	9	16:00	UTC	7	988.2	94	0.9	27	0	8	991	85	0.2	990.7	84	0	29	0.5	-1.9
2019	3	9	17:00	UTC	7	988.2	97	0	27	0.3	8	990.5	97	0.2	990.4	99	0.2	29	-0.4	-0.5
2019	3	9	18:00	UTC	7	988.1	97	1.2	27	0.7	8	989.8	96	0.8	989.7	100	0	29	0.3	0.3
2019	3	9	19:00	UTC	7	988.3	92	0.1	28	1.3	8	988.9	91	1.4	988.8	99	0	29	0.7	0.6
2019	3	9	20:00	UTC	7	988.4	90	0	28	1.5	8	988.2	89	1.6	988.1	99	0.4	31	0.8	0.7
2019	3	9	21:00	UTC	7	988.5	95	0.4	28	0.8	8	987.3	95	0.9	987.1	97	0	30	0.9	0.5
2019	3	9	22:00	UTC	7	988.4	96	0	28	1	8	986.6	97	0.6	986.6	100	0.5	30	0.4	0.4
2019	3	9	23:00	UTC	7	988.2	94	0.3	28	1.2	8	985.7	96	0.8	985.8	100	0	30	0.5	0.5
2019	3	10	00:00	UTC	7	988.3	95	0	28	0.9	8	984.9	94	1.2	984.8	99	0	31	0.8	0.7
2019	3	10	01:00	UTC	7	988.3	98	0	28	0.4	8	984.2	97	0.5	984.2	100	0	30	0.5	0.5
2019	3	10	02:00	UTC	7	988.4	98	0.3	28	0.7	8	983.5	97	0.6	983.6	100	0.3	30	0.1	0.1
2019	3	10	03:00	UTC	7	988.5	98	0.4	28	0.9	8	982.9	97	0.5	982.9	100	0.5	30	0.2	0.2
2019	3	10	04:00	UTC	7	988.7	98	0.8	28	0.2	8	982.7	98	0.1	982.7	100	0.2	30	0.1	0.1
2019	3	10	05:00	UTC	7	988.9	99	0.4	28	0.2	8	982.7	98	0.2	983.1	100	0.4	29	-1.5	-1.5
2019	3	10	06:00	UTC	7	989.1	93	0	28	-1.2	8	983.3	92	-1.2	983.6	95	0	29	-1.8	-2.5
2019	3	10	07:00	UTC	7	989.5	91	0	28	-1.6	8	983.9	89	-1.7	984.1	93	0	29	-2.1	-3.1
2019	3	10	08:00	UTC	7	990	87	0	28	-1	7	984.4	86	-1.5	984.5	89	0	29	-1.7	-3.3
2019	3	10	09:00	UTC	3	990.6	84	0	28	-0.9	1	985.2	82	-1.5	985.4	81	0	29	-0.9	-3.7
2019	3	10	10:00	UTC	8	991.3	77	0	28	-0.5	7	985.8	75	-1	985.9	75	0	29	-1.2	-5
2019	3	10	11:00	UTC	1	991.8	65	0	28	-0.4	3	986.5	64	-0.9	986.6	71	0	29	-1.9	-6.5
2019	3	10	12:00	UTC	5	992.4	55	0	28	0.4	6	987	57	-0.9	987.1	65	0	29	-1.3	-7
2019	3	10	13:00	UTC	1	993	58	0	28	-1.3	3	987.5	57	-1.4	987.6	61	0	29	-2.2	-8.8
2019	3	10	14:00	UTC	5	993.5	57	0	28	-1.2	5	987.9	58	-1.5	987.9	60	0	29	-1.5	-8.3
2019	3	10	15:00	UTC	5	994	57	0	28	-1	7	988.2	61	-1.5	988.2	65	0	29	-2	-7.7
2019	3	10	16:00	UTC	7	994.6	60	0	28	-1.5	7	988.3	62	-1.6	988.3	63	0	30	-2.5	-8.6
2019	3	10	17:00	UTC	1	995.3	66	0	28	-2.7	6	988.2	61	-2	988.2	71	0	30	-2.6	-7.2
2019	3	10	18:00	UTC	1	996	72	0	28	-2.9	3	988.1	71	-2.7	988.1	90	0	30	-4.9	-6.3
2019	3	10	19:00	UTC	3	996.4	77	0	28	-3.2	2	988.4	78	-3.7	988.4	93	0	31	-4.5	-5.5
2019	3	10	20:00	UTC	5	997	80	0	28	-3.6	7	988.4	77	-3.4	988.5	91	0	30	-6.3	-7.5
2019	3	10	21:00	UTC	0	997.6	75	0	28	-4.4	0	988.5	78	-4.7	988.5	85	0	30	-6.9	-8.9
2019	3	10	22:00	UTC	0	998.2	77	0	28	-5.1	0	988.4	77	-5.3	988.4	88	0	30	-7.6	-9.3
2019	3	10	23:00	UTC	0	998.9	79	0	28	-5.5	2	988.3	76	-5.2	988.3	88	0	31	-6.6	-8.3
2019	3	11	00:00	UTC	1	999.4	80	0	28	-5.4	0	988.4	80	-5.5	988.5	90	0	30	-7.8	-9.1
2019	3	11	01:00	UTC	0	1000	86	0	28	-6.3	3	988.3	89	-7.4	988.4	94	0	29	-8.4	-9.2
2019	3	11	02:00	UTC	0	1000.8	88	0	28	-6.3	0	988.5	92	-8.2	988.5	96	0	29	-9.2	-9.8
2019	3	11	03:00	UTC	1	1001.4	92	0	28	-7.1	4	988.7	95	-10.2	988.8	97	0	30	-8.5	-8.9
2019	3	11	04:00	UTC	3	1002.1	93	0	28	-7.1	8	988.8	94	-7.9	988.8	97	0	31	-7.3	-7.8
2019	3	11	05:00	UTC	8	1002.7	92	0	28	-6.6	8	989	93	-7	988.9	96	0	31	-7.1	-7.6
2019	3	11	06:00	UTC	7	1003.2	90	0	28	-6.4	8	989.1	92	-6.8	989.2	95	0	31	-6.9	-7.5
2019	3	11	07:00	UTC	7	1003.4	84	0	28	-5.9	8	989.5	85	-6	989.6	92	0	30	-5.9	-7
2019	3	11	08:00	UTC	3	1003.8	80	0	27	-5.6	8	990.1	85	-6	990.2	90	0	30	-6.4	-7.8
2019	3	11	09:00	UTC	3	1004.2	68	0	27	-4.2	5	990.7	70	-5.1	990.8	77	0	30	-5.3	-8.7
2019	3	11	10:00	UTC	7	1004.4	72	0	28	-4.1	7	991.3	76	-4.8	991.4	84	0	30	-4.9	-7.1
2019	3	11	11:00	UTC	8	1005.1	75	0	28	-3.6	7	991.8	73	-4.2	991.9	80	0	31	-4.5	-7.4
2019	3	11	12:00	UTC	8	1005.3	76	0	28	-3.6	8	992.5	84	-4.4	992.5	86	0	31	-4.5	-6.6
2019	3	11	13:00	UTC	7	1005.7	79	0	28	-3.5	7	993.1	77	-4.2	993.2	85	0	31	-4.4	-6.6
2019	3	11	14:00	UTC	7	1006.1	69	0	29	-3.2	7	993.6	70	-3.8	993.5	79	0	32	-4	-7.1
2019	3	11	15:00	UTC	1	1006.3	72	0	29	-4	6	994	73	-4	994.1	77	0	32	-4.1	-7.5
2019	3	11	16:00	UTC	0	1006.7	79	0	29	-4.7	4	994.6	75	-4.2	994.6	82	0	32	-4.6	-7.3
2019	3	11	17:00	UTC	7	1007.3	83	0	29	-4.8	8	995.3	86	-4.8	995.4	87	0	33	-5	-6.9
2019	3	11	18:00	UTC	7	1007.4	84	0	29	-5.1	7	996	88	-5.1	996.1	93	0	33	-6.1	-7.1
2019	3	11	19:00	UTC	8	1007.6	87	0	29	-5.5	7	996.4	88	-5.4	996.5	92	0	32	-5.9	-7
2019	3	11	20:00	UTC	3	1007.9	90	0	29	-6.3	7	997	88	-5.7	997.2	93	0	32	-6.4	-7.3
2019	3	11	21:00	UTC	1	1007.7	92	0	29	-7	1	997.7	94	-7.5	997.8	97	0	33	-7.5	-8
2019	3	11	22:00	UTC	0	1008.2	93	0	29	-7.7	0	998.3	94	-8.3	998.4	96	0	32	-7.7	-8.3
2019	3	11	23:00	UTC	0	1008.1	92	0	29	-7.6	0	999.1	94	-9.9	999.2	94	0	33	-8.4	-9.2
2019	3	12	00:00	UTC	0	1007.5	90	0	29	-8	0	999.5	91	-8.9	999.6	94	0	32	-9.6	-10.4
2019	3	12	01:00	UTC	1	1007.9	91	0	29	-9	0	1000.1	91	-10.1	1000.3	93	0	33	-9.7	-10.6
2019	3	12	02:00	UTC	0	1008	91	0	29	-9.6	0	1000.9	91	-10.3	1001	94	0	33	-10.8	-11.5
2019	3	12	03:00	UTC	3	1007.7	91	0	29	-9.4	6	1001.5	92	-11.3	1001.7	94	0	33	-10.9	-11.6
2019	3	12	04:00	UTC	7	1007.8	90	0	29	-9.8	5	1002.2	92	-10.3	1002.4	94	0	33	-11.5	-12.3
2019	3	12	05:00	UTC	3	1007.6	90	0	29	-9.3	1	1002.8	89	-9.7	1002.9	93	0	33	-10.8	-11.7
2019	3	12	06:00	UTC	0	1007.6	89	0	29	-8.4	0	1003.2	89	-8.8	1003.3	93	0	33	-9.4	-10.3
2019	3	12	07:00	UTC	1	1007.3	83	0	29	-5.8	0	1003.4	84	-7	1003.6	91	0	33	-8	-9.2
2019	3	12	08:00	UTC	1	1007.2	78	0	29	-4.6	1	1003.9	82	-5.7	1004	88	0	33	-5.6	-7.2
2019	3	12	09:00	UTC	1	1007.2	72	0	28	-2.7	7	1004.1	77	-3.9	1004.3	80	0	33	-3.9	-6.9
2019	3	12	10:00	UTC	3	1007	67	0	28	-1.9	7	1004.4	74	-3.1	1004.5	77	0	33	-3	-6.4
2019	3	12	11:00	UTC	8	1007.1	69	0	29	-1.8	8	1005	73	-2.8	1005.1	76	0	33	-2.8	-6.4
2019	3	12	12:00	UTC	8	1006.6	71	0	29	-2	8	1005.2	66	-2	1005.3	75	0	33	-2.4	-6.3
2019	3	12	13:00	UTC	8	1006.1	67	0	29	-1.5	7	1005.6	70	-2.1	1005.8	74	0	33	-2.3	-6.3
2019	3	12	14:00	UTC	8	1005.3	70	0	29	-1.8	8	1006.1	71	-2.3	1006.2	74	0	33	-2.4	-6.5
2019	3	12	15:00	UTC	8	1004.9	73	0	29	-2	8	1006.3	70	-2.3	1006.4	74	0	33	-2.6	-6.5
2019	3	12	16:00	UTC	7	1004.7	70	0	29	-2.3	5	1006.7	70	-2.3	1006.7	78	0	33	-3.6	-6.9
2019	3	12	17:00	UTC	1	1004.8	76	0	29	-3.4	1	1007.4	74	-3.3	1007.4	83	0	33	-5.4	-7.8
2019	3	12	18:00	UTC	0	1004.5	79	0	29	-4.1	0	1007.5	87	-6.7	1007.6	88	0	32	-6.1	-7.8
2019	3	12	19:00	UTC	0	1004.1	79	0	29	-4.3	0	1007.7	94	-8.7	1007.7	94	0	32	-7.2	-7.9
2019	3	12	20:00	UTC	0	1003.6	82	0	29	-4.9	0	1008	96	-8.9	1008.2	97	0	32	-9.4	-9.8
2019	3	12	21:00	UTC	0	1003.1	89	0	29	-5.9	0	1007.9	92	-11.2	1007.9	99	0	33	-8.9	-9
2019	3	12	22:00	UTC	0	1002.6	91	0	29	-7.4	0	1008.3	92	-11.6	1008.5	95	0	33	-10.9	-11.5
2019	3	12	23:00	UTC	0	1002	92	0	29	-7.9	0	1008.3	91	-12.3	1008.3	95	0	32	-10	-10.7
2019	3	13	00:00	UTC	0	1001.6	92	0	29	-8.8	0	1007.6	92	-11.8	1007.7	93	0	33	-10.9	-11.8
2019	3	13	01:00	UTC	0	1001.2	91	0	29	-8.4	0	1008	88	-13	1008.2	93	0	33	-11.9	-12.8
2019	3	13	02:00	UTC	0	1000.7	93	0	29	-9.5	0	1008.1	89	-13.3	1008.2	92	0	33	-13.2	-14.3
2019	3	13	03:00	UTC	0	1000.6	93	0	29	-9.9	0	1007.9	89	-13.6	1008.1	90	0	32	-13.5	-14.8
2019	3	13	04:00	UTC	0	1000.2	92	0	29	-10.4	0	1008	89	-14	1008.2	88	0	32	-13.5	-15.1
2019	3	13	05:00	UTC	1	1000	91	0	29	-10.4	0	1007.8	89	-14.2	1008	92	0	33	-12	-13.1
2019	3	13	06:00	UTC	7	999.9	92	0	29	-7.9	7	1007.7	89	-11.9	1007.8	94	0	33	-9.6	-10.3
2019	3	13	07:00	UTC	8	999.8	87	0	29	-5.3	8	1007.4	93	-5.7	1007.5	92	0	33	-7.1	-8.2
2019	3	13	08:00	UTC	7	999.7	80	0	29	-2.6	8	1007.4	92	-3.9	1007.5	93	0	32	-5	-5.9
2019	3	13	09:00	UTC	8	999.6	71	0	29	-1.6	8	1007.3	74	-1.9	1007.3	86	0	32	-2.8	-4.8
2019	3	13	10:00	UTC	8	998.8	70	0	29	-1.2	8	1007.1	75	-1.8	1007.1	75	0	32	-2.1	-6
2019	3	13	11:00	UTC	8	998.5	66	0	29	-0.9	8	1007.1	68	-1.6	1007.1	72	0	32	-1.8	-6.2
2019	3	13	12:00	UTC	7	998.2	65	0	29	-0.6	7	1006.6	68	-1.5	1006.6	71	0	32	-1.8	-6.4
2019	3	13	13:00	UTC	1	997.6	66	0	29	-0.7	6	1006.1	68	-1.4	1006.2	72	0	33	-1.9	-6.3
2019	3	13	14:00	UTC	5	997.2	71	0	29	-1.3	6	1005.5	71	-1.5	1005.6	73	0	33	-2	-6.1
2019	3	13	15:00	UTC	5	996.6	72	0	29	-1.1	7	1004.8	73	-1.4	1005	76	0	33	-2.1	-5.8
2019	3	13	16:00	UTC	7	996.6	76	0	29	-1.1	7	1004.8	77	-1.3	1004.9	80	0	33	-2.1	-5.1
2019	3	13	17:00	UTC	7	996.5	74	0	29	-0.6	7	1004.9	77	-0.9	1004.8	81	0	33	-1.7	-4.6
2019	3	13	18:00	UTC	8	996.3	74	0	29	-0.7	8	1004.4	74	-0.9	1004.5	79	0	33	-1.3	-4.5
2019	3	13	19:00	UTC	8	995.9	74	0	29	-0.7	8	1004	73	-0.7	1004.1	80	0	33	-1.3	-4.3
2019	3	13	20:00	UTC	8	995.5	93	1.6	29	-1.6	8	1003.6	81	-0.9	1003.6	91	0.7	32	-1.8	-3
2019	3	13	21:00	UTC	8	995	96	1.1	30	-1.4	8	1002.9	93	-1.3	1003.1	98	1.5	35	-1.6	-1.9
2019	3	13	22:00	UTC	8	994.5	96	1.1	32	-1.1	8	1002.6	94	-1	1002.6	98	1	37	-1.4	-1.6
2019	3	13	23:00	UTC	8	994.4	96	0.9	32	-0.8	8	1001.9	94	-0.7	1002.1	99	1	39	-1.1	-1.2
2019	3	14	00:00	UTC	8	994	97	1.2	33	-0.7	8	1001.6	95	-0.6	1001.6	99	1.2	40	-0.8	-1
2019	3	14	01:00	UTC	8	993.9	97	0	34	-0.3	8	1001.3	94	-0.3	1001.2	98	0	40	-0.5	-0.8
2019	3	14	02:00	UTC	8	993.9	97	0.7	34	0.1	8	1000.9	95	0.1	1000.9	99	0	41	-0.2	-0.3
2019	3	14	03:00	UTC	8	994	97	0	34	0.4	8	1000.6	95	0.4	1000.6	100	0	41	0	0
2019	3	14	04:00	UTC	8	994	98	0	34	0.5	8	1000.4	96	0.6	1000.3	100	0	40	0.2	0.2
2019	3	14	05:00	UTC	7	994.3	97	0	34	0.6	8	1000	96	0.7	1000.1	100	0	40	0.3	0.3
2019	3	14	06:00	UTC	7	994.4	96	0	34	0.7	8	1000	95	0.8	999.9	100	0	40	0.5	0.5
2019	3	14	07:00	UTC	7	994.6	95	0	34	0.9	8	999.9	95	0.8	999.8	100	0	41	0.5	0.5
2019	3	14	08:00	UTC	7	995.1	94	0	33	1	8	999.8	94	0.9	999.7	100	0.4	40	0.6	0.6
2019	3	14	09:00	UTC	7	995.5	93	0	33	1.3	8	999.6	93	1	999.6	99	0	40	0.7	0.6
2019	3	14	10:00	UTC	7	995.6	91	0	33	1.4	8	998.9	92	1	999	98	0	40	0.9	0.6
2019	3	14	11:00	UTC	7	995.6	91	0	32	1.4	8	998.5	92	1.1	998.5	97	0	39	0.9	0.4
2019	3	14	12:00	UTC	7	995.6	90	0	32	1.4	7	998.1	90	1.3	998.2	96	0	39	1	0.4
2019	3	14	13:00	UTC	7	995.4	87	0	32	2	8	997.8	89	1.7	997.6	94	0	38	1.5	0.6
2019	3	14	14:00	UTC	7	995.1	89	0	31	1.9	8	997.2	90	1.7	997.3	96	0	38	1.3	0.7
2019	3	14	15:00	UTC	7	994.9	89	0	31	1.8	8	996.7	89	1.8	996.8	94	0	37	1.5	0.6
2019	3	14	16:00	UTC	7	994.5	89	0	31	1.7	8	996.7	88	1.8	996.8	94	0	37	1.3	0.4
2019	3	14	17:00	UTC	7	994.2	89	0	31	1.7	8	996.6	88	1.7	996.7	94	0	37	1.2	0.4
2019	3	14	18:00	UTC	7	993.7	89	0	31	1.7	8	996.4	87	1.9	996.5	94	0	37	1.4	0.5
2019	3	14	19:00	UTC	7	993.1	89	0	31	1.7	8	995.8	88	1.9	996.1	93	0	37	1.5	0.4
2019	3	14	20:00	UTC	7	992.7	89	0	31	1.9	8	995.4	88	2	995.7	93	0	37	1.6	0.6
2019	3	14	21:00	UTC	7	991.8	88	0	31	2.1	8	995.1	88	2.1	995.3	91	0	37	1.9	0.7
2019	3	14	22:00	UTC	7	991.5	88	0	30	2.2	8	994.6	87	2.3	994.7	94	0	37	1.7	0.8
2019	3	14	23:00	UTC	7	991	91	0	30	2.1	8	994.4	89	2.1	994.5	96	0	37	1.6	1
2019	3	15	00:00	UTC	7	990.5	92	0	30	1.9	8	994	90	2.1	994.2	95	0	36	1.9	1.2
2019	3	15	01:00	UTC	7	990.2	93	0	30	1.9	8	994	92	2.2	994	96	0	36	2	1.4
2019	3	15	02:00	UTC	7	990	94	0	30	2	8	994	93	2.1	994	98	0	36	1.9	1.5
2019	3	15	03:00	UTC	7	989.9	97	0	30	1.7	8	994	94	2.1	994	99	1	36	1.7	1.6
2019	3	15	04:00	UTC	7	989.9	97	0	30	1.7	8	994	94	2.1	994	100	0.3	36	1.6	1.6
2019	3	15	05:00	UTC	7	990.1	98	0	29	1.4	8	994.3	97	1.5	994.2	100	0	35	1.3	1.3
2019	3	15	06:00	UTC	7	990.2	98	0.3	29	1.3	8	994.4	97	1.2	994.4	100	0	35	1.1	1.1
2019	3	15	07:00	UTC	7	990.6	99	0	29	1.4	8	994.7	98	1.5	994.5	100	0	35	1.2	1.2
2019	3	15	08:00	UTC	7	991.2	98	0	29	1.6	8	995	98	1.8	994.9	100	0	34	1.3	1.3
2019	3	15	09:00	UTC	7	991.7	96	0	29	1.8	8	995.5	94	2	995.5	100	0	34	1.3	1.3
2019	3	15	10:00	UTC	8	992.1	98	0	28	1.8	8	995.7	97	1.7	995.6	100	0	33	1.6	1.6
2019	3	15	11:00	UTC	8	992.5	95	0	28	2	8	995.7	95	1.8	995.6	100	0	33	1.5	1.5
2019	3	15	12:00	UTC	8	993.1	93	0	28	1.9	8	995.6	93	1.8	995.5	100	0	33	1.6	1.6
2019	3	15	13:00	UTC	8	993.7	94	0	28	1.9	8	995.4	94	1.8	995.3	99	0	31	1.6	1.4
2019	3	15	14:00	UTC	8	994	94	0	28	2.1	8	995.1	95	2	995.1	100	0	32	1.4	1.4
2019	3	15	15:00	UTC	7	994.4	97	1.3	28	1.7	8	995	95	1.9	995	99	0	31	1.6	1.5
2019	3	15	16:00	UTC	7	995	97	0	28	1.8	8	994.6	96	1.9	994.6	100	1	31	1.5	1.5
2019	3	15	17:00	UTC	7	995.3	98	0.7	27	2.1	8	994.3	97	1.9	994.3	100	0.3	31	1.3	1.3
2019	3	15	18:00	UTC	8	995.7	98	0	28	2.2	8	993.8	97	2	993.8	100	0	31	1.5	1.5
2019	3	15	19:00	UTC	7	996.3	97	0	27	2.2	8	993.3	94	2.5	993.3	100	0	31	1.8	1.8
2019	3	15	20:00	UTC	5	996.4	94	0	27	2.2	7	992.7	93	2.1	992.8	100	0	31	1.5	1.5
2019	3	15	21:00	UTC	8	996.8	90	0	27	2.7	8	991.9	93	2.2	992.1	100	0	31	1.6	1.6
2019	3	15	22:00	UTC	7	997.1	91	0.3	27	2.4	8	991.5	88	2.5	991.7	96	0.6	31	2	1.5
2019	3	15	23:00	UTC	8	997.3	93	0.9	27	2	8	991	91	2.2	991.2	97	1.1	31	1.6	1.2
2019	3	16	00:00	UTC	8	997.5	93	0.3	27	1.9	8	990.5	93	1.8	990.6	99	0.7	31	1.5	1.3
2019	3	16	01:00	UTC	7	998.1	94	0	27	1.9	8	990.2	94	1.6	990.4	99	0.2	30	1.4	1.3
2019	3	16	02:00	UTC	7	998.3	95	0.5	27	1.6	8	990	95	1.4	990.2	100	1.1	30	1	1
2019	3	16	03:00	UTC	7	998.2	96	0.6	27	1.5	8	989.9	95	1.4	990.1	100	1.1	30	0.7	0.7
2019	3	16	04:00	UTC	7	998.4	95	0.3	27	1.7	8	989.9	95	1.6	990.1	100	0	30	1.2	1.2
2019	3	16	05:00	UTC	8	998.8	96	0	26	1.5	8	990.2	95	1.5	990.3	100	0	30	1.4	1.3
2019	3	16	06:00	UTC	7	999.2	96	0.4	26	1.5	8	990.3	95	1.4	990.4	100	0.4	31	1.2	1.2
2019	3	16	07:00	UTC	7	999.6	95	0	26	1.4	8	990.7	95	1.1	990.9	99	0.4	30	1	0.9
2019	3	16	08:00	UTC	8	999.7	96	0.3	26	1.2	8	991.1	96	1.1	991.4	100	0.6	30	0.8	0.8
2019	3	16	09:00	UTC	7	1000.1	97	0.4	27	0.9	8	991.7	96	0.8	991.9	100	0.7	30	0.6	0.6
2019	3	16	10:00	UTC	8	1000.1	97	0	27	1.3	8	992.2	96	1.2	992.3	100	0.2	31	0.9	0.9
2019	3	16	11:00	UTC	8	999.5	96	0	27	1.5	8	992.6	96	1.5	992.8	100	0	30	1.1	1.1
2019	3	16	12:00	UTC	7	999.3	96	0	26	1.6	8	993.2	95	1.4	993.3	100	0	30	1.3	1.3
2019	3	16	13:00	UTC	8	998.6	95	0	26	1.7	8	993.8	95	1.5	993.9	100	0	30	1.4	1.4
2019	3	16	14:00	UTC	7	997.7	95	0	26	1.6	8	994	95	1.6	994.1	100	0	30	1.3	1.3
2019	3	16	15:00	UTC	7	996.8	96	0	26	1.4	8	994.5	95	1.5	994.5	100	0	30	1.3	1.3
2019	3	16	16:00	UTC	8	996.3	95	0	26	1.6	8	995.1	96	1.4	995.2	100	0	30	1.2	1.1
2019	3	16	17:00	UTC	7	995.4	97	0.3	26	1.5	8	995.5	97	1.3	995.6	100	0	30	1	1
2019	3	16	18:00	UTC	8	994.7	97	0	26	1.9	8	995.9	97	1.3	995.9	100	0	30	1	1
2019	3	16	19:00	UTC	8	994	97	0	26	1.8	8	996.4	96	1.8	996.5	100	0.6	30	1.2	1.2
2019	3	16	20:00	UTC	7	993.7	97	0.3	25	1.7	8	996.5	96	1.7	996.6	100	0.2	30	1.2	1.2
2019	3	16	21:00	UTC	7	993.9	98	0	25	1.6	8	996.8	97	1.7	996.9	100	0	29	1.4	1.4
2019	3	16	22:00	UTC	8	994.2	98	0.3	25	1.7	8	997.2	97	1.6	997.3	100	0.3	30	1.5	1.5
2019	3	16	23:00	UTC	9	994.6	99	0.3	25	1.6	8	997.4	98	1.6	997.3	100	1	30	1	1
2019	3	17	00:00	UTC	7	994.3	99	0	25	1.5	8	997.5	99	1.6	997.6	100	0.2	30	1.5	1.5
2019	3	17	01:00	UTC	8	994.4	99	0	25	1.5	8	998.1	99	1.4	998.1	100	0	30	1.1	1.1
2019	3	17	02:00	UTC	8	994.8	99	0	25	1.5	8	998.2	99	1.2	998.2	100	0	30	1	1
2019	3	17	03:00	UTC	9	995.3	100	0	25	1.3	9	998.2	99	1.3	998.2	100	0	29	1	1
[truncated: 213 more rows]

## Sheet: Location
Havaintoasema	Asemakoodi	Latitudi (desimaaliasteita)	Longitudi (desimaaliasteita)	Alkuhetki	Loppuhetki	Datan luontihetki
Helsinki Malmi lentokenttä	101009	60.25299	25.04549	2018-12-30T00:00:00.000Z	2019-03-26T00:00:00.000Z	2019-03-26T08:35:07.808Z
Helsinki Kumpula	101004	60.20307	24.96131	2018-12-30T00:00:00.000Z	2019-03-26T00:00:00.000Z	2019-03-26T08:27:35.593Z
Vantaa Helsinki-Vantaan lentoasema	100968	60.32670	24.95675	2018-12-31T00:00:00.000Z	2019-03-26T00:00:00.000Z	2019-03-26T08:54:51.425Z

## Sheet: Sun and Atmosphere
Date	Solar Azimuth	Solar Evelation Angle at Noon	Solar Declination (degreese)	Cosine of Zenith Angle	Solar Elevation Angle	Solar Noon	Measurement Period	Ozone Column Thickness
2018-02-28	179.9°	22.0°	-7.91	0.376°	22.0° – 18.8°	12:32 EET	12:20-13:20 EET	492 DU
2019-01-27	179.8°	11.6°	-18.48	0.200°	11.6 - 10.9°	12:32 EET	12:05-13:45 EET	395 DU
data can be calculated from e.g. https://www.esrl.noaa.gov/gmd/grad/solcalc/azel.html
